# Supplementary material for: Catalytic asymmetric synthesis of enantioenriched β-nitronitrile bearing a C-CF3stereogenic center
Source: Royal Society of Chemistry journal article supplement (doi:10.1039/c6ra00093b), 2016-01-01
Supplement: c6ra00093b1.pdf [file c6ra00093b1.pdf]

## Supporting Information

### Catalytic asymmetric synthesis of enantioenriched $\beta$ -nitronitrile bearing a C-CF<sub>3</sub> stereogenic center

Ajay Jakhar,<sup>a,b</sup> Prathibha Kumari,<sup>a,b</sup> Mohd Nazish,<sup>a,b</sup> Noor-ul H. Khan,<sup>\*a,b</sup> Rukhsana I. Kureshy,<sup>a,b</sup> Sayed H. R. Abdi,<sup>a,b</sup> and E. Suresh<sup>b,c</sup>

<sup>a</sup> Inorganic Materials and Catalysis Division, <sup>b</sup> Academy of Scientific and Innovative Research, <sup>c</sup> Analytical Division and Centralized Instrument Facility, CSIR-Central Salt and Marine Chemicals Research Institute, G. B. Marg, Bhavnagar- 364 002, Gujarat, India. e-mail: [khan251293@yahoo.in](mailto:khan251293@yahoo.in)

### Contents

| List of Contents                                                                                                                       | Page No |
|----------------------------------------------------------------------------------------------------------------------------------------|---------|
| 1. Effect of additives on asymmetric hydrocyanation reaction of $\beta$ -CF <sub>3</sub> - $\beta$ -nitroolefins.....                  | S2      |
| 2. Characterization data of the products .....                                                                                         | S2-S19  |
| 3. Synthesis of ( <i>S</i> )-2-((( <i>tert</i> -Butoxycarbonyl)amino)methyl)-3,3,3-trifluoro-2-phenylpropanoic acid ( <b>5a</b> )..... | S20     |
| 4. Copy of <sup>1</sup> H, <sup>13</sup> C and <sup>19</sup> F NMR Spectra .....                                                       | S21-S43 |
| 5. Copy of HRMS.....                                                                                                                   | S43-S50 |
| 6. Crystal reports for product ( <b>2a</b> ).....                                                                                      | S51-52  |

## 1. Effect of additives on asymmetric hydrocyanation reaction of $\beta$ -CF<sub>3</sub>- $\beta$ -nitroolefins

**Table S1.** Effect of additives on asymmetric hydrocyanation reaction using the L3: Ti(O<sup>*t*</sup>Bu)<sub>4</sub> catalyst <sup>[a]</sup>

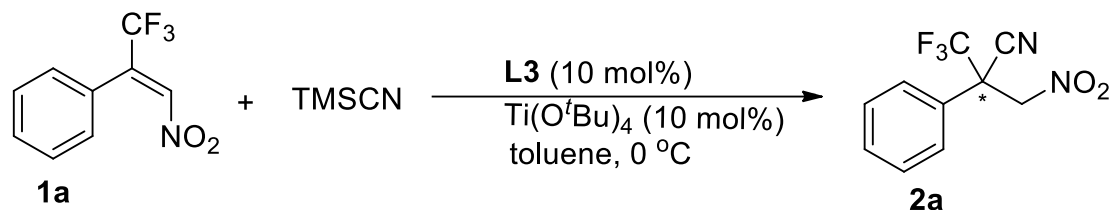

| Entry | additive loading (mol%)                          | temp (°C) | time (h) | yield <sup>b</sup> (%) | ee <sup>c</sup> (%) |
|-------|--------------------------------------------------|-----------|----------|------------------------|---------------------|
| 1     | 4-phenylpyridine- <i>N</i> -oxide (20 mol%)      | 0         | 20       | 90                     | 83                  |
| 2     | <i>t</i> -BuOH (20 mol%)                         | 0         | 20       | 92                     | 84                  |
| 3     | 2- <i>tert</i> -butylphenol (20 mol%)            | 0         | 16       | 93                     | 87                  |
| 4     | 4- <i>tert</i> -butylphenol (20 mol%)            | 0         | 16       | 93                     | 87                  |
| 5     | 2,4-di- <i>tert</i> -butylphenol (20 mol%)       | 0         | 16       | 93                     | 87                  |
| 6     | 4-nitrophenol (20 mol%)                          | 0         | 16       | 94                     | 88                  |
| 7     | 4-admantyl-2- <i>tert</i> -butylphenol (20 mol%) | 0         | 24       | 89                     | 87                  |
| 8     | 4Å molecular sieves (100mg)                      | 0         | 20       | 92                     | 87                  |
| 9     | <i>t</i> -BuOK (20 mol %)                        | 0         | 20       | 92                     | 85                  |

<sup>a</sup> Enantioselective hydrocyanation reaction of **1a** (0.1 mmol) was carried out with **L3**: Ti(O<sup>*t*</sup>Bu)<sub>4</sub> catalyst (10 mol%) in toluene (1 mL) using TMSCN (0.20 mmol) as a source of cyanide. <sup>b</sup> Isolated yield. <sup>c</sup> ee were determined by chiral HPLC using OD-H column.

## 2. Characterization data of the products

### 4-(Adamantan-1-yl)-2-(*tert*-butyl)phenol (A1):

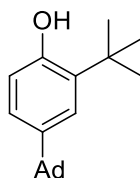

White solid; m.p. = 95-97 °C; <sup>1</sup>H NMR (200 MHz, CDCl<sub>3</sub>)  $\delta$  = 7.27-7.21 (m, 1H), 7.07-7.01 (m, 1H), 6.62-6.56 (m, 1H), 4.64 (s, 1H), 2.13-1.75 (m, br, 15H), 1.41 (s, 9H) ppm; <sup>13</sup>C NMR (50 MHz,

$\text{CDCl}_3$ )  $\delta = 151.8, 143.3, 135.1, 123.5, 123.1, 116.0, 43.4, 36.8, 35.7, 34.7, 29.6, 29.0$  ppm; HRMS (ESI+):  $m/z$  Calcd. for  $\text{C}_{20}\text{H}_{29}\text{O}$   $[\text{M}+\text{H}]^+$  285.2218, Found: 285.2213.

**5-(Adamantan-1-yl)-3-(*tert*-butyl)-2-hydroxybenzaldehyde (A2):**

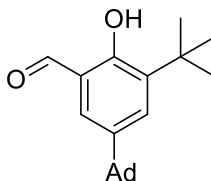

White solid; m.p. = 103-105 °C;  $^1\text{H}$  NMR (200 MHz,  $\text{CDCl}_3$ )  $\delta = 11.63$  (s, 1H), 9.86 (s, 1H), 7.57-7.56 (m, 1H), 7.32-7.30 (m, 1H), 2.14-1.78 (m, br, 15H), 1.43 (s, 9H) ppm;  $^{13}\text{C}$  NMR (50 MHz,  $\text{CDCl}_3$ )  $\delta = 197.3, 159.0, 141.9, 137.4, 131.3, 127.8, 120.1, 43.2, 36.6, 35.6, 35.0, 29.3, 28.8$  ppm; HRMS (ESI+):  $m/z$  Calcd. for  $\text{C}_{21}\text{H}_{29}\text{O}_2$   $[\text{M}+\text{H}]^+$  313.2168, Found: 313.2158.

**(*R, R*)-(-)-*N, N*-Bis(5-Adamantyl-3-*tert*-butylsalicylidene)-1,2-cyclohexanediamine (L5):**

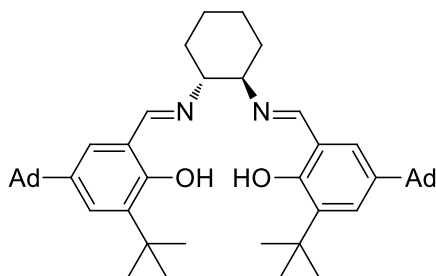

Yellow solid; m.p. = 150-152 °C;  $[\alpha]_{\text{D}}^{29} = -155.7$  (c 1.0,  $\text{CHCl}_3$ );  $^1\text{H}$  NMR (200 MHz,  $\text{CDCl}_3$ )  $\delta = 13.67$  (s, 2H), 8.27 (s, 2H), 7.27-7.20 (m, 2H), 6.97-6.92 (m, 2H), 3.32-3.28 (m, br, 1H), 2.15-1.72 (m, br, 38H), 1.41 (s, 18H) ppm;  $^{13}\text{C}$  NMR (50 MHz,  $\text{CDCl}_3$ )  $\delta = 166.0, 157.9, 140.3, 136.2, 126.1, 125.9, 117.9, 72.3, 43.2, 36.7, 35.4, 34.9, 33.2, 29.4, 28.9, 24.3$  ppm; HRMS (ESI+):  $m/z$  Calcd. for  $\text{C}_{48}\text{H}_{67}\text{N}_2\text{O}_2$   $[\text{M}+\text{H}]^+$  703.5203, Found: 703.5214.

**(*S*)-3,3,3-Trifluoro-2-(nitromethyl)-2-phenylpropanenitrile (2a):**

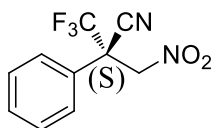

White solid; m.p. = 96-98 °C;  $[\alpha]_{\text{D}}^{27} = +47.4$  (c 1.0,  $\text{CHCl}_3$ ); **After Crystallization:**  $[\alpha]_{\text{D}}^{27} = +59.3$  (c 1.0,  $\text{CHCl}_3$ );  $^1\text{H}$  NMR (500 MHz,  $\text{CDCl}_3$ )  $\delta = 7.62$ -7.51 (m, 5H), 5.28-5.20 (dd,  $J = 26, 14.5$  Hz, 2H) ppm;  $^{19}\text{F}$  NMR (376 MHz,  $\text{CDCl}_3$ )  $\delta = -70.56$  (s, 3F) ppm;  $^{13}\text{C}$  NMR (125 MHz,  $\text{CDCl}_3$ )  $\delta = 131.0, 129.7, 127.1, 125.7, 123.3, 121.0, 113.3, 73.8, 52.0$  (q,  $J = 28.7$  ppm; HRMS (ESI+):  $m/z$  Calcd. for  $\text{C}_{10}\text{H}_8\text{F}_3\text{N}_2\text{O}_2$   $[\text{M}+\text{H}]^+$  245.0538, Found: 245.0549; CHIRALCEL OD-H column, *n*-hexane/2-propanol = 80:20, flow rate 1 mL/min,  $t_{\text{r}1}$  (minor) = 9.99 min,  $t_{\text{r}2}$  (major) = 15.15 min.

## HPLC Chromatograms

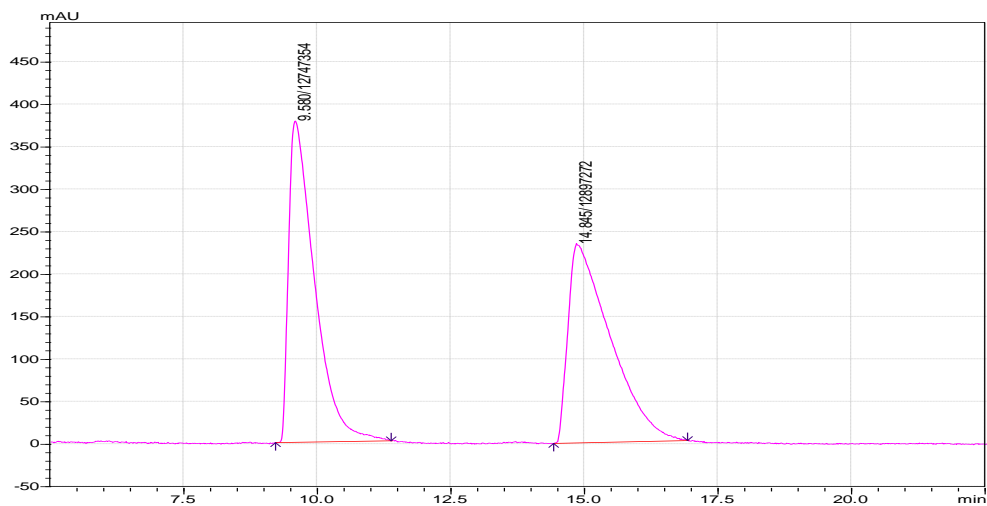

| Peak | Ret. Time | Area     | Peak Start | Peak End | Area%   |
|------|-----------|----------|------------|----------|---------|
| 1    | 9.580     | 12747354 | 9.216      | 11.381   | 49.7077 |
| 2    | 14.845    | 12897272 | 14.421     | 16.928   | 50.2923 |

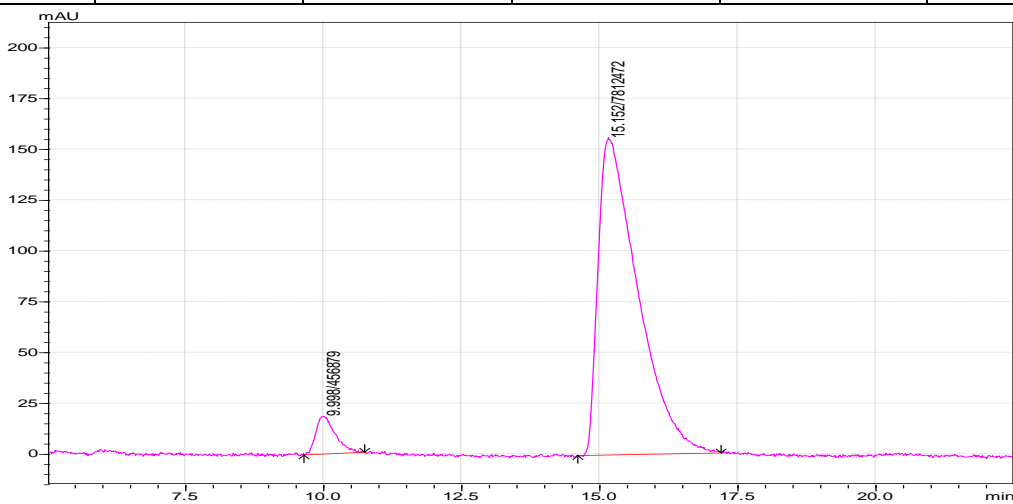

| Peak | Ret. Time | Area    | Peak Start | Peak End | Area%   |
|------|-----------|---------|------------|----------|---------|
| 1    | 9.998     | 456879  | 9.643      | 10.741   | 5.5250  |
| 2    | 15.152    | 7812472 | 14.603     | 17.195   | 94.4750 |

## After Crystallization

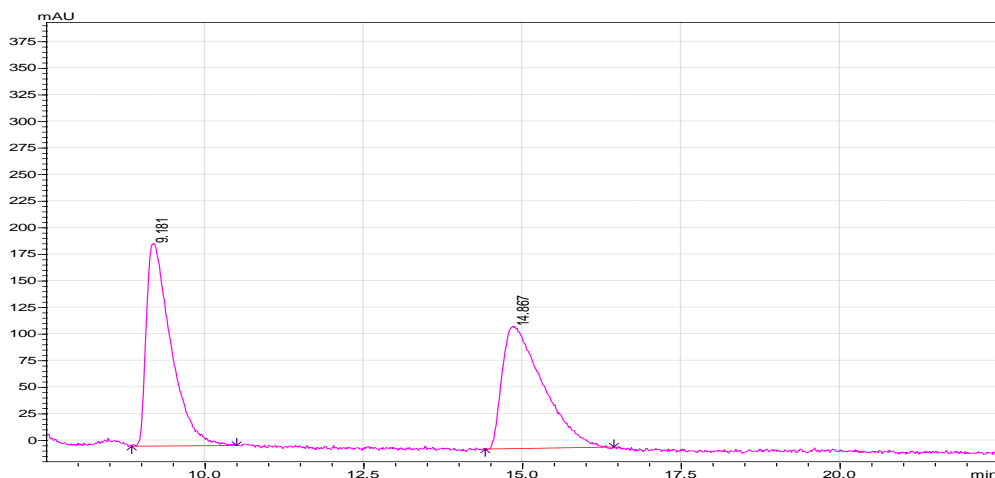

| Peak | Ret. Time | Area    | Peak Start | Peak End | Area%   |
|------|-----------|---------|------------|----------|---------|
| 1    | 9.181     | 5150880 | 8.843      | 10.496   | 50.2092 |
| 2    | 14.867    | 5107967 | 14.411     | 16.437   | 49.7908 |

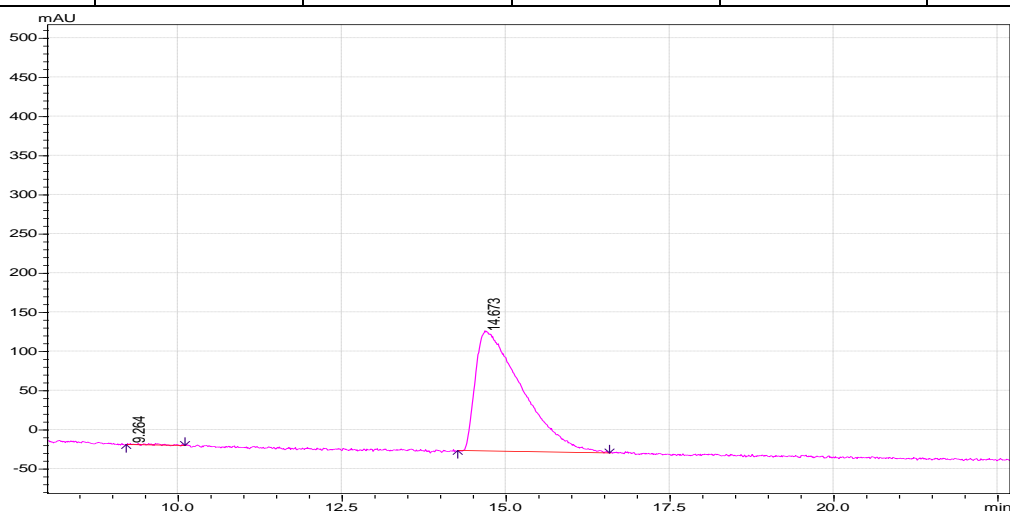

| Peak | Ret. Time | Area    | Peak Start | Peak End | Area%   |
|------|-----------|---------|------------|----------|---------|
| 1    | 9.264     | 19694   | 9.205      | 10.101   | 0.2604  |
| 2    | 14.673    | 7544724 | 14.261     | 16.576   | 99.7396 |

### 3,3,3-Trifluoro-2-(nitromethyl)-2-(*m*-tolyl)propanenitrile (2b):

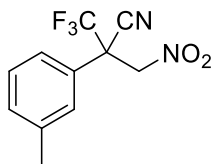

Colorless liquid;  $[\alpha]_D^{27} = +16.5$  ( $c = 0.2$ ,  $\text{CHCl}_3$ );  $^1\text{H NMR}$  (500 MHz,  $\text{CDCl}_3$ )  $\delta = 7.41$ - $7.32$  (m, 3H),  $5.26$ - $5.18$  (dd,  $J = 26.5$ , 14 Hz, 2H),  $2.42$  (s, 3H) ppm;  $^{19}\text{F NMR}$  (376 MHz,  $\text{CDCl}_3$ )  $\delta = -70.52$  (s, 3F) ppm;  $^{13}\text{C NMR}$  (125 MHz,  $\text{CDCl}_3$ )  $\delta = 139.9$ ,  $131.8$ ,  $129.5$ ,  $127.8$ ,  $125.5$ ,  $123.9$ ,

123.3, 121.1, 113.4, 73.9, 52 (q,  $J = 28.8$  Hz), 21.4 ppm; TOF-MS (ESI+) Anal. Calcd. for (C<sub>11</sub>H<sub>9</sub>F<sub>3</sub>N<sub>2</sub>O<sub>2</sub>+Na) 281.06, Found: 281.08; CHIRALCEL OD-H column, hexane/2-propanol = 80:20, flow rate 1 mL/min,  $t_{r1}$  (minor) = 8.39 min,  $t_{r2}$  (major) = 14.55 min.

### HPLC Chromatograms

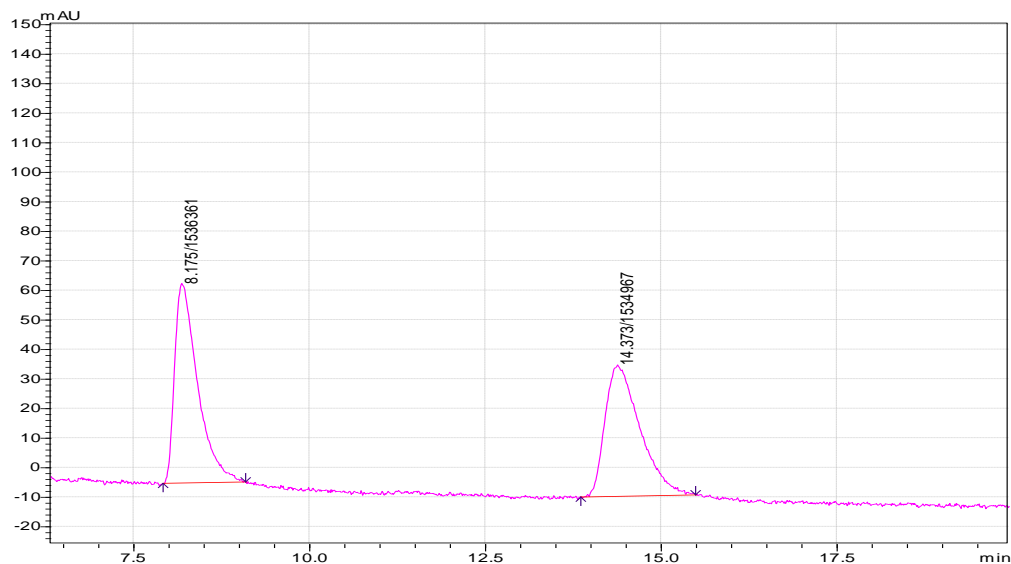

| Peak | Ret. Time | Area    | Peak Start | Peak End | Area%   |
|------|-----------|---------|------------|----------|---------|
| 1    | 8.175     | 1536361 | 7.915      | 9.088    | 50.0227 |
| 2    | 14.373    | 1534967 | 13.856     | 15.488   | 49.9773 |

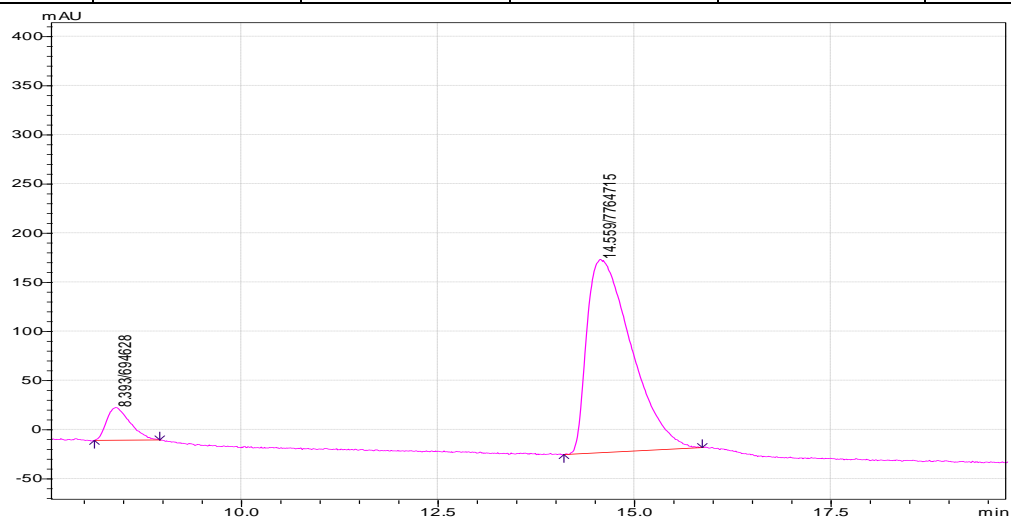

| Peak | Ret. Time | Area    | Peak Start | Peak End | Area%   |
|------|-----------|---------|------------|----------|---------|
| 1    | 8.393     | 694628  | 8.128      | 8.960    | 8.2114  |
| 2    | 14.559    | 7764715 | 14.101     | 15.861   | 91.7886 |

**3,3,3-Trifluoro-2-(nitromethyl)-2-(*p*-tolyl)propanenitrile (2c):**

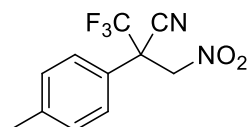

Colorless liquid;  $[\alpha]_D^{27} = +59.5$  (c 1.1,  $\text{CHCl}_3$ );  $^1\text{H NMR}$  (500 MHz,  $\text{CDCl}_3$ )  $\delta = 7.49$ - $7.47$  (m, 2H),  $7.31$ - $7.30$  (m, 2H),  $5.24$ - $5.17$  (dd,  $J = 22.5, 14$  Hz, 2H),  $2.39$  (s, 3H) ppm;  $^{19}\text{F NMR}$  (376 MHz,  $\text{CDCl}_3$ )  $\delta = -70.78$  (s, 3F) ppm;  $^{13}\text{C NMR}$  (125 MHz,  $\text{CDCl}_3$ )  $\delta = 141.4, 130.4, 126.9, 123.3, 122.5, 121.1, 113.4, 73.9, 51.9, 51.6, 21.0$  ppm; HRMS (ESI+):  $m/z$  Calcd. for  $\text{C}_{11}\text{H}_{10}\text{F}_3\text{N}_2\text{O}_2$   $[\text{M}+\text{H}]^+$  259.0694, Found: 259.0680; CHIRALCEL OD-H column, *n*-hexane/2-propanol = 80:20, flow rate 1 mL/min,  $t_{r1}$  (minor) = 9.40 min,  $t_{r2}$  (major) = 26.37 min.

### HPLC Chromatograms

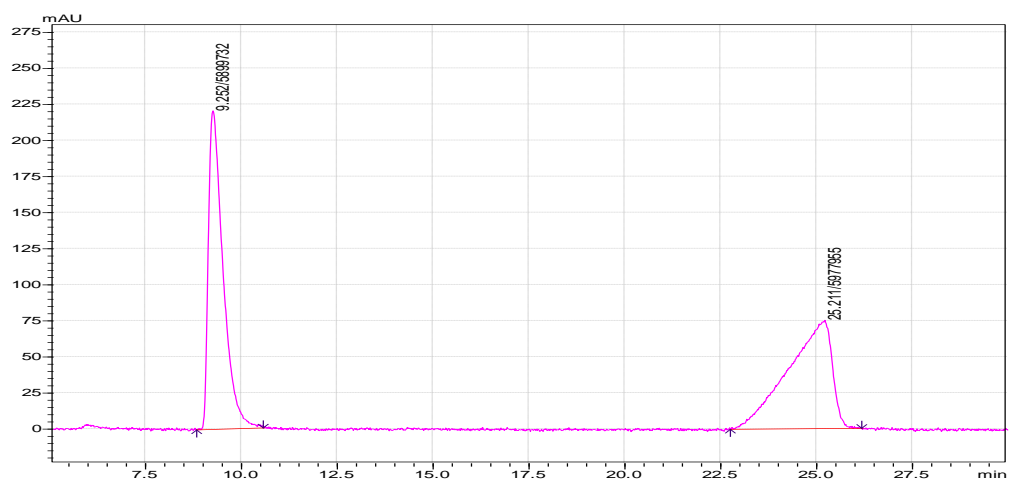

| Peak | Ret. Time | Area    | Peak Start | Peak End | Area%   |
|------|-----------|---------|------------|----------|---------|
| 1    | 9.252     | 5899732 | 8.832      | 10.571   | 49.6707 |
| 2    | 25.211    | 5977955 | 22.752     | 26.176   | 50.3293 |

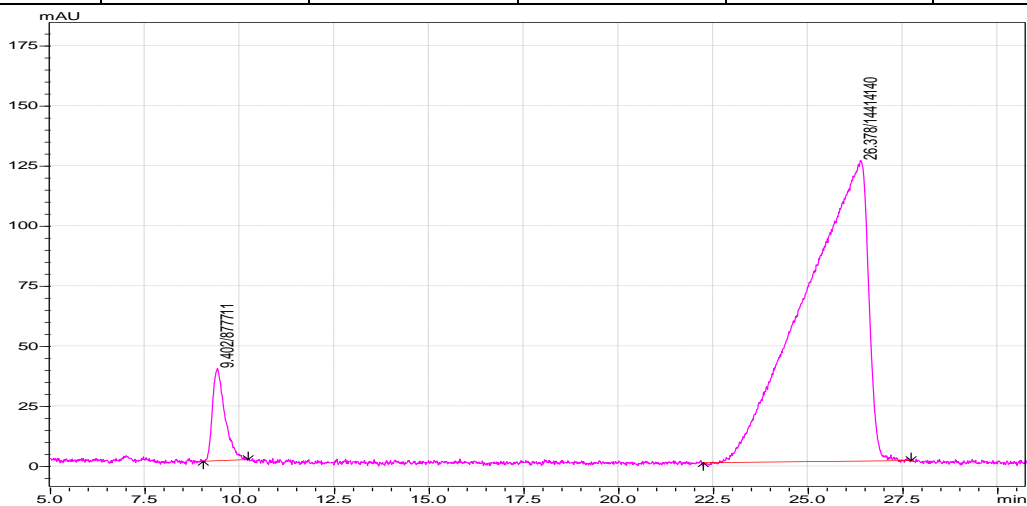

| Peak | Ret. Time | Area     | Peak Start | Peak End | Area%   |
|------|-----------|----------|------------|----------|---------|
| 1    | 9.402     | 877711   | 9.035      | 10.219   | 5.7397  |
| 2    | 26.378    | 14414140 | 22.229     | 27.712   | 94.2603 |

### 3,3,3-Trifluoro-2-(2-methoxyphenyl)-2-(nitromethyl)propanenitrile (2d):

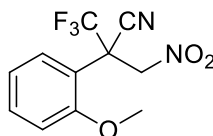

White solid;  $[\alpha]_D^{27} = +21.7$  (c 0.2,  $\text{CHCl}_3$ );  $^1\text{H NMR}$  (500 MHz,  $\text{CDCl}_3$ )  $\delta = 7.75$ - $7.73$  (d,  $J = 8$  Hz, 1H),  $7.48$ - $7.45$  (m, 1H),  $7.12$ - $7.09$  (t,  $J = 15.5, 7.5$  Hz, 1H),  $6.99$ - $6.97$  (d,  $J = 8$  Hz, 1H)  $5.92$ - $5.89$  (d,  $J = 14.5$  Hz, 1H),  $5.11$ - $5.08$  (d,  $J = 14.5$  Hz, 1H),  $3.83$  (s, 3H) ppm;  $^{19}\text{F NMR}$  (376 MHz,  $\text{CDCl}_3$ )  $\delta = -70.11$  (s, 3F) ppm;  $^{13}\text{C NMR}$  (125 MHz,  $\text{CDCl}_3$ )  $\delta = 157.2, 132.3, 131.8, 123.7, 121.8, 121.4, 114.8, 113.8, 112.6, 73.4, 55.7, 51.7$  ppm; HRMS (ESI+):  $m/z$  Calcd. for  $\text{C}_{11}\text{H}_{10}\text{F}_3\text{N}_2\text{O}_3$   $[\text{M}+\text{H}]^+ 275.0644$ , Found:  $275.0644$ ; CHIRALCEL OD-H column,  $n$ -hexane/2-propanol = 80:20, flow rate 1 mL/min,  $t_{r1}$  (major) = 7.35 min,  $t_{r2}$  (minor) = 8.59 min.

### HPLC Chromatograms

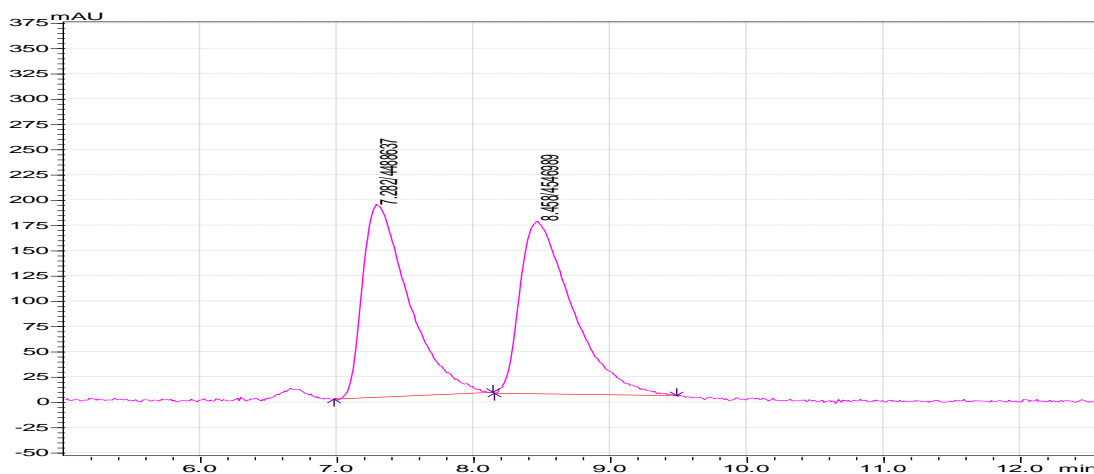

| Peak | Ret. Time | Area    | Peak Start | Peak End | Area%   |
|------|-----------|---------|------------|----------|---------|
| 1    | 7.282     | 4488637 | 6.976      | 8.139    | 49.6771 |
| 2    | 8.458     | 4546989 | 8.149      | 9.483    | 50.3229 |



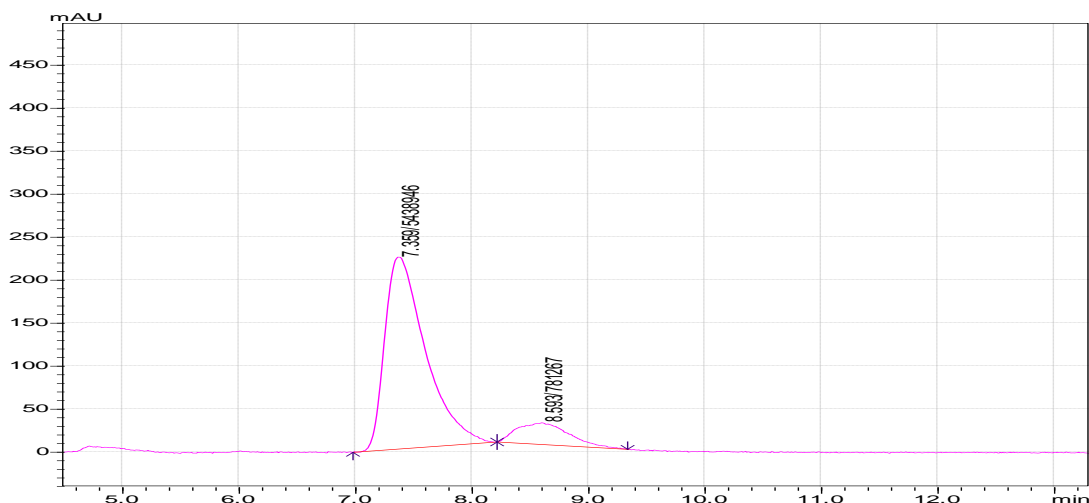

| Peak | Ret. Time | Area    | Peak Start | Peak End | Area%   |
|------|-----------|---------|------------|----------|---------|
| 1    | 7.359     | 5438946 | 6.976      | 8.213    | 87.4399 |
| 2    | 8.593     | 781267  | 8.213      | 9.333    | 12.5601 |

### 3,3,3-Trifluoro-2-(4-methoxyphenyl)-2-(nitromethyl)propanenitrile (2e):

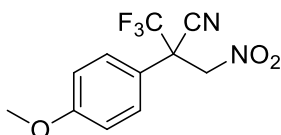

Colorless liquid;  $[\alpha]_D^{27} = +46.7$  (c 1.0,  $\text{CHCl}_3$ );  $^1\text{H NMR}$  (200 MHz,  $\text{CDCl}_3$ )  $\delta = 7.54$ - $7.49$  (m, 2H),  $7.02$ - $6.97$  (m, 2H),  $5.18$  (s, 2H),  $3.84$  (s, 3H) ppm;  $^{19}\text{F NMR}$  (376 MHz,  $\text{CDCl}_3$ )  $\delta = -71.03$  (s, 3F) ppm;  $^{13}\text{C NMR}$  (125 MHz,  $\text{CDCl}_3$ )  $\delta = 161.4$ ,  $128.5$ ,  $123.4$ ,  $121.1$ ,  $117.0$ ,  $115.0$ ,  $113.5$ ,  $74.0$ ,  $55.4$ ,  $51.5$  (q,  $J = 29.3$  Hz) ppm; HRMS (ESI+):  $m/z$  Calcd. for  $\text{C}_{11}\text{H}_{10}\text{F}_3\text{N}_2\text{O}_3$   $[\text{M}+\text{H}]^+$  275.0644, Found: 275.0652; CHIRALCEL OD-H column, *n*-hexane/2-propanol = 80:20, flow rate 1 mL/min,  $t_{r1}$  (minor) = 12.78 min,  $t_{r2}$  (major) = 40.04 min.

### HPLC Chromatograms

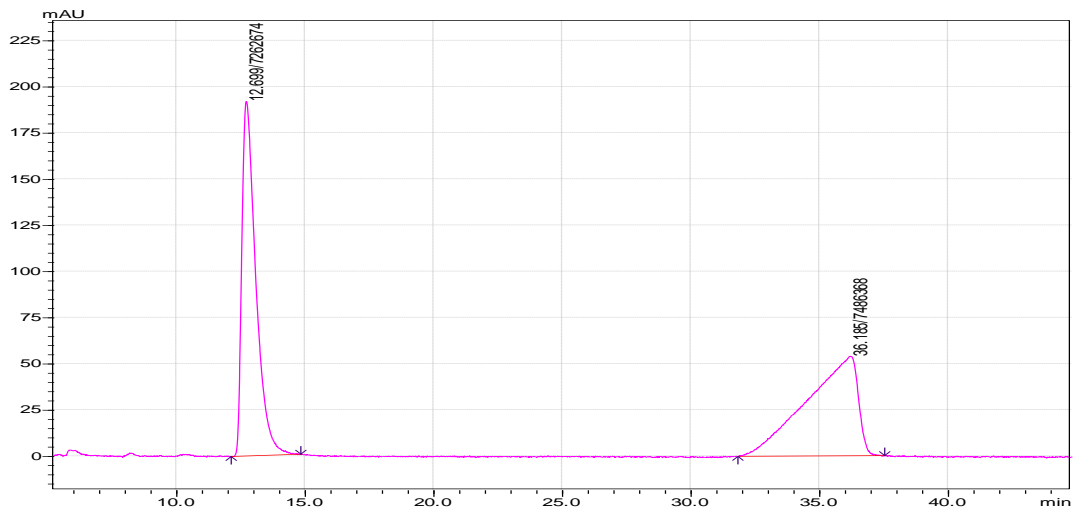

| Peak | Ret. Time | Area    | Peak Start | Peak End | Area%   |
|------|-----------|---------|------------|----------|---------|
| 1    | 12.699    | 7262674 | 12.117     | 14.827   | 49.2417 |
| 2    | 36.185    | 7486368 | 31.819     | 37.525   | 50.7583 |

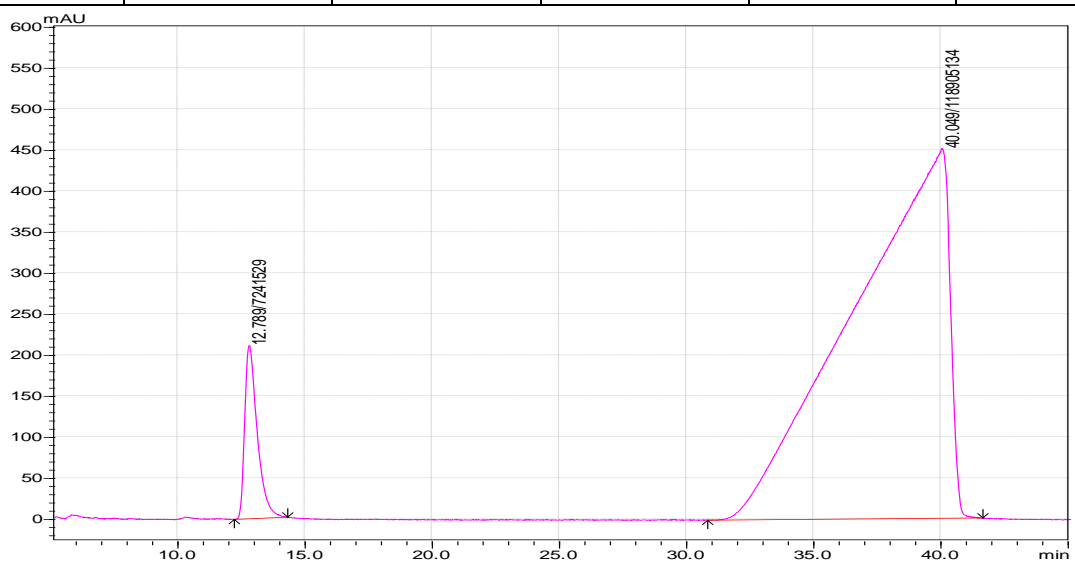

| Peak | Ret. Time | Area      | Peak Start | Peak End | Area%   |
|------|-----------|-----------|------------|----------|---------|
| 1    | 12.789    | 7241529   | 12.213     | 14.315   | 5.7406  |
| 2    | 40.049    | 118905134 | 30.827     | 41.653   | 94.2594 |

**2-(4-Chlorophenyl)-3,3,3-trifluoro-2-(nitromethyl)propanenitrile (2f):**

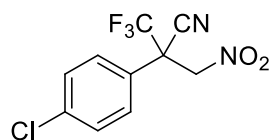

Colorless liquid;  $[\alpha]_D^{27} = +36.9$  (c 0.9,  $\text{CHCl}_3$ );  $^1\text{H}$  NMR (200 MHz,  $\text{CDCl}_3$ )  $\delta = 7.58$ - $7.47$  (m, 4H), 5.22 (s, 2H) ppm;  $^{19}\text{F}$  NMR (376 MHz,  $\text{CDCl}_3$ )  $\delta = -70.60$  (s, 3F) ppm;  $^{13}\text{C}$  NMR (125 MHz,  $\text{CDCl}_3$ )  $\delta = 137.7, 130.0, 128.5, 124.2, 122.0$  (q,  $J = 284.3$  Hz), 113.0, 73.7, 51.6 (q,  $J = 29.3$  Hz) ppm; HRMS (ESI+): m/z Calcd. for  $\text{C}_{10}\text{H}_7\text{F}_3\text{N}_2\text{O}_2\text{Cl}$   $[\text{M}+\text{H}]^+$  279.0148, Found: 279.0153; CHIRALCEL OD-H column, *n*-hexane/2-propanol = 80:20, flow rate 1 mL/min,  $t_{r1}$  (minor) = 10.52 min,  $t_{r2}$  (major) = 19.88 min.

## HPLC Chromatograms

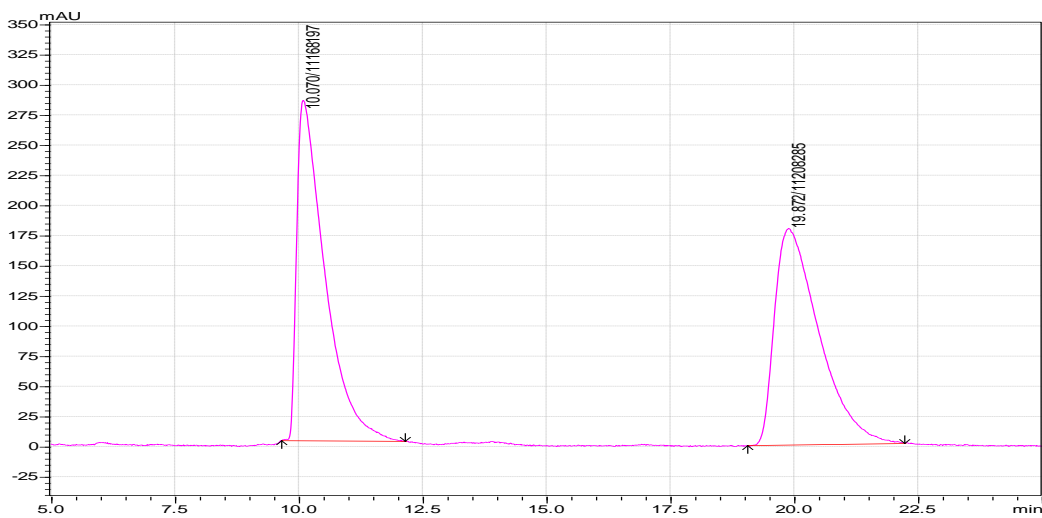

| Peak | Ret. Time | Area     | Peak Start | Peak End | Area%   |
|------|-----------|----------|------------|----------|---------|
| 1    | 10.070    | 11168197 | 9.643      | 12.139   | 49.9104 |
| 2    | 19.872    | 11208285 | 19.051     | 22.219   | 50.0896 |

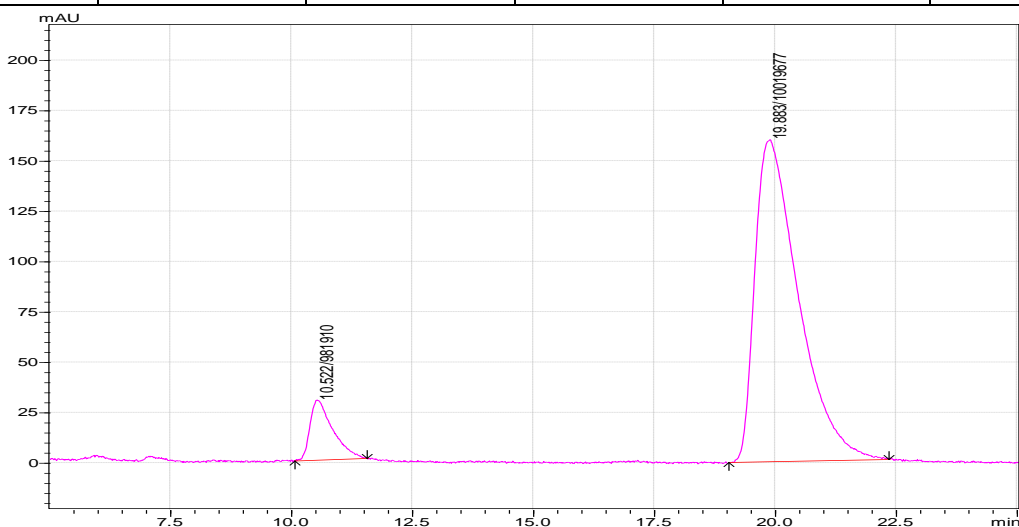

| Peak | Ret. Time | Area     | Peak Start | Peak End | Area%   |
|------|-----------|----------|------------|----------|---------|
| 1    | 10.522    | 981910   | 10.069     | 11.563   | 8.9252  |
| 2    | 19.883    | 10019677 | 19.040     | 22.347   | 91.0748 |

### 3,3,3-Trifluoro-2-(4-fluorophenyl)-2-(nitromethyl)propanenitrile (2g)

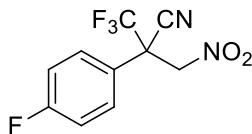

Colorless liquid;  $[\alpha]_D^{27} = +15.4$  (c 0.9,  $\text{CHCl}_3$ );  $^1\text{H NMR}$  (200 MHz,  $\text{CDCl}_3$ )  $\delta = 7.65$ - $7.58$  (m, 2H),  $7.26$ - $7.17$  (m, 2H),  $5.22$  (s, 2H) ppm;  $^{19}\text{F NMR}$  (376 MHz,  $\text{CDCl}_3$ )  $\delta = -70.78$  (s, 3F),  $-108.43$  to  $-108.48$  (m, 1F) ppm;  $^{13}\text{C NMR}$  (125 MHz,  $\text{CDCl}_3$ )  $\delta = 164.0$  (d,  $J = 252.5$  Hz),  $129.4$  (d,  $J = 7.5$  Hz),  $122.1$  (q,  $J = 283.7$  Hz),  $121.5$ ,  $117.0$  (d,  $J = 22.5$  Hz),  $113.2$ ,  $73.9$ ,  $51.5$  (q,  $J = 29.3$  Hz), ppm; HRMS (ESI+):  $m/z$  Calcd. for  $\text{C}_{10}\text{H}_7\text{F}_4\text{N}_2\text{O}_2$   $[\text{M}+\text{H}]^+$  263.0444, Found: 263.0442; CHIRALCEL OD-H column, hexane/2-propanol = 80:20, flow rate 1 mL/min,  $t_{r1}$  (minor) = 9.76 min,  $t_{r2}$  (major) = 12.98 min.

### HPLC Chromatograms

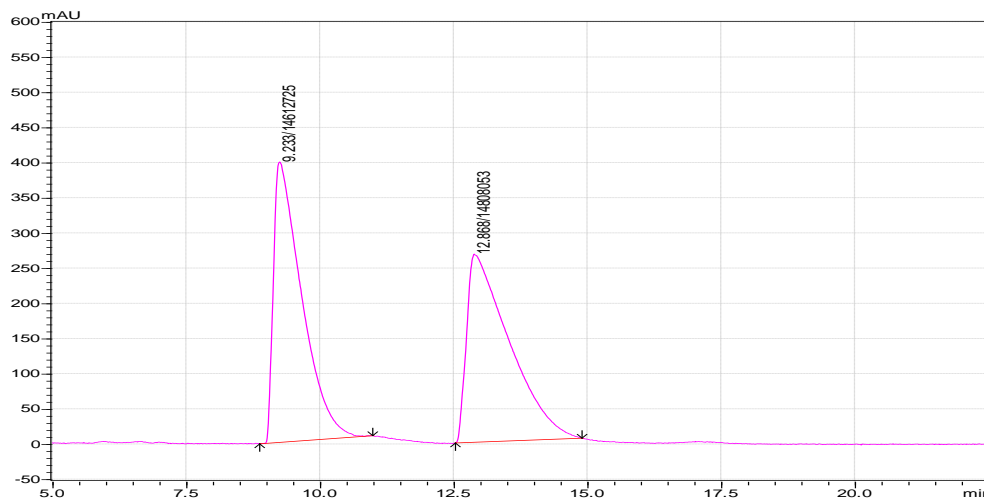

| Peak | Ret. Time | Area     | Peak Start | Peak End | Area%   |
|------|-----------|----------|------------|----------|---------|
| 1    | 9.233     | 14612725 | 8.864      | 10.976   | 49.6680 |
| 2    | 12.868    | 14808053 | 12.523     | 14.891   | 50.3320 |

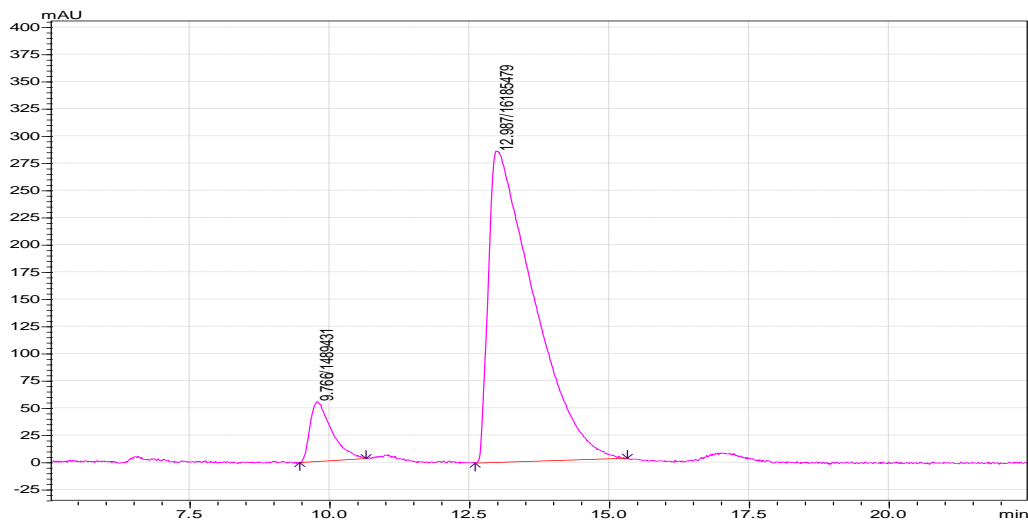

| Peak | Ret. Time | Area     | Peak Start | Peak End | Area%   |
|------|-----------|----------|------------|----------|---------|
| 1    | 9.766     | 1489431  | 9.461      | 10.645   | 8.4268  |
| 2    | 12.987    | 16185479 | 12.597     | 15.317   | 91.5732 |

### 3,3,3-Trifluoro-2-(3-fluorophenyl)-2-(nitromethyl)propanenitrile (2h):

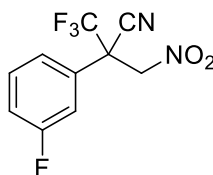

White solid; m.p. = 50-52 °C;  $[\alpha]_D^{27} = +18.2$  (c 0.4,  $\text{CHCl}_3$ );  $^1\text{H NMR}$  (200 MHz,  $\text{CDCl}_3$ )  $\delta = 7.57$ - $7.21$  (m, 4H),  $5.22$  (s, 2H) ppm;  $^{19}\text{F NMR}$  (376 MHz,  $\text{CDCl}_3$ )  $\delta = -70.37$  (s, 3F),  $-108.86$  to  $-108.92$  (m, 1F) ppm;  $^{13}\text{C NMR}$  (125 MHz,  $\text{CDCl}_3$ )  $\delta = 162.9$  (d,  $J = 248.7$ ),  $131.5$  (d,  $J = 7.5$  Hz),  $127.9$  (d,  $J = 6.2$  Hz),  $123.1$ ,  $122.9$ ,  $120.8$ ,  $118.4$  (d,  $J = 20$  Hz),  $114.9$  (d,  $J = 25$  Hz),  $112.9$ ,  $73.7$ ,  $51.8$ ,  $51.6$  ppm; HRMS (ESI+): m/z Calcd. for  $\text{C}_{10}\text{H}_7\text{F}_4\text{N}_2\text{O}_2$   $[\text{M}+\text{H}]^+$  263.0444, Found: 263.0435; CHIRALCEL OD-H column, *n*-hexane/2-propanol = 80:20, flow rate 1 mL/min,  $t_{r1}$  (minor) = 10.39 min,  $t_{r2}$  (major) = 14.96 min.

### HPLC Chromatograms

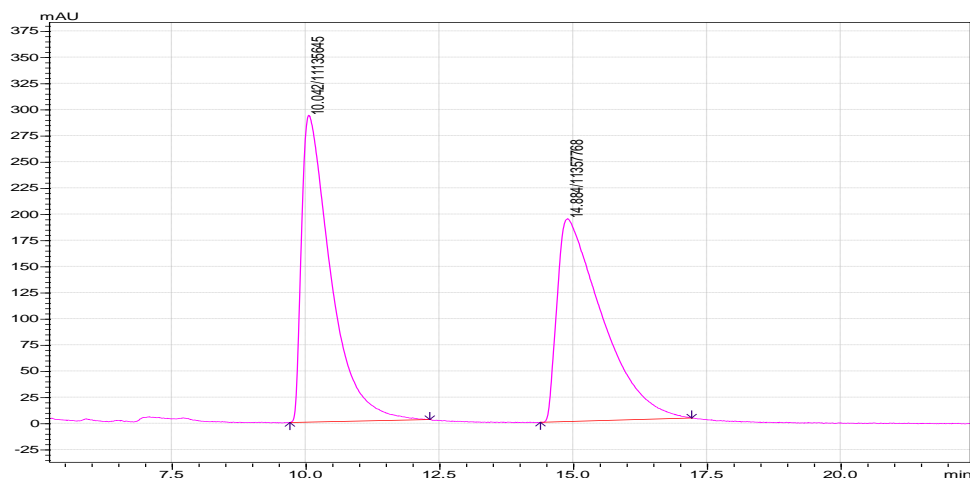

| Peak | Ret. Time | Area     | Peak Start | Peak End | Area%   |
|------|-----------|----------|------------|----------|---------|
| 1    | 10.042    | 11135645 | 9.696      | 12.309   | 49.5063 |
| 2    | 14.884    | 11357768 | 14.379     | 17.205   | 50.4937 |

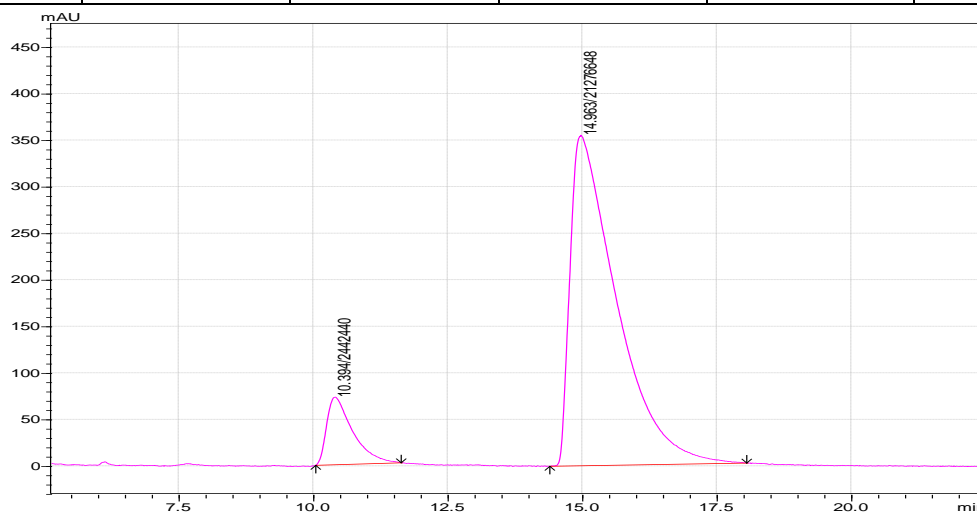

| Peak | Ret. Time | Area     | Peak Start | Peak End | Area%   |
|------|-----------|----------|------------|----------|---------|
| 1    | 10.394    | 2442440  | 10.037     | 11.627   | 10.2974 |
| 2    | 14.963    | 21276648 | 14.389     | 18.048   | 89.7026 |

### 3,3,3-Trifluoro-2-(2-fluorophenyl)-2-(nitromethyl)propanenitrile (2i)

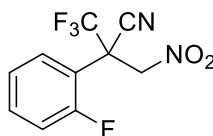

White solid; m.p. = 72-74 °C;  $[\alpha]_D^{27} = +15.0$  (c 0.2, CHCl<sub>3</sub>); <sup>1</sup>H NMR (500 MHz, CDCl<sub>3</sub>)  $\delta$  = 7.83-7.80 (m, 1H), 7.56-7.52 (m, 1H), 7.36-7.33 (m, 1H), 7.21-7.17 (m, 1H), 5.68-5.65 (d, *J* = 14.5 Hz, 1H), 5.21-5.17 (dd, *J* = 14.5, 2.5 Hz, 1H) ppm; <sup>19</sup>F NMR (376 MHz, CDCl<sub>3</sub>)  $\delta$  = -70.58 (s, 3F), -

106.68 (s, 1F) ppm;  $^{13}\text{C}$  NMR (125 MHz,  $\text{CDCl}_3$ )  $\delta$  = 160.0 (d,  $J$  = 249.1 Hz), 133.4 (d,  $J$  = 9 Hz), 131.6, 125.6 (d,  $J$  = 16.2 Hz), 123.2, 120.9, 117.6 (d,  $J$  = 23.2 Hz), 113.2, 113.1 (d,  $J$  = 10.2 Hz), 72.8 (d,  $J$  = 10.2 Hz), 51.1 ppm; HRMS (ESI+):  $m/z$  Calcd. for  $\text{C}_{10}\text{H}_7\text{F}_4\text{N}_2\text{O}_2$   $[\text{M}+\text{H}]^+$  263.0444, Found: 263.0445; CHIRALCEL OD-H column, *n*-hexane/2-propanol = 90:10, flow rate 0.8 mL/min,  $t_{r1}$  (minor) = 10.39 min,  $t_{r2}$  (major) = 14.96 min.

## HPLC Chromatograms

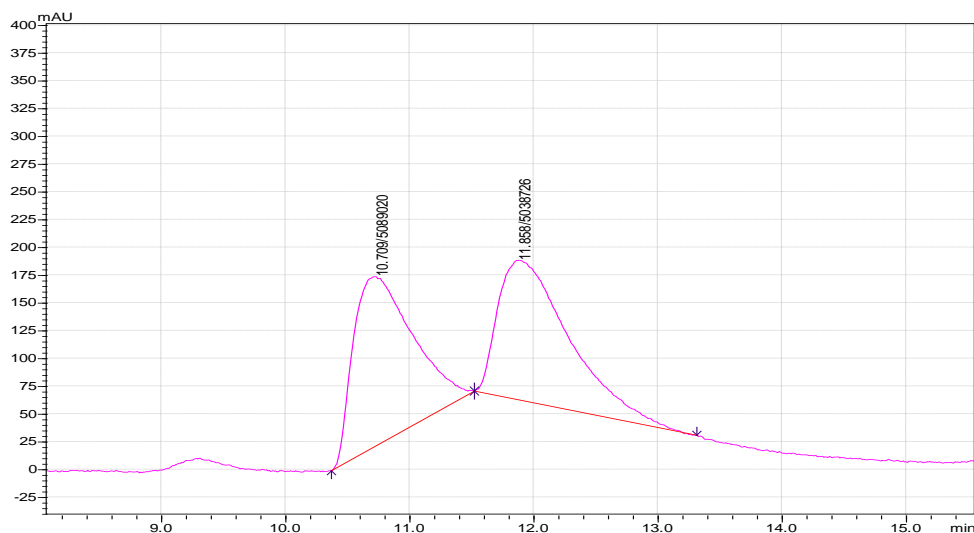

| Peak | Ret. Time | Area    | Peak Start | Peak End | Area%   |
|------|-----------|---------|------------|----------|---------|
| 1    | 10.709    | 5089020 | 10.368     | 11.520   | 50.2483 |
| 2    | 11.858    | 5038726 | 11.520     | 13.312   | 49.7517 |

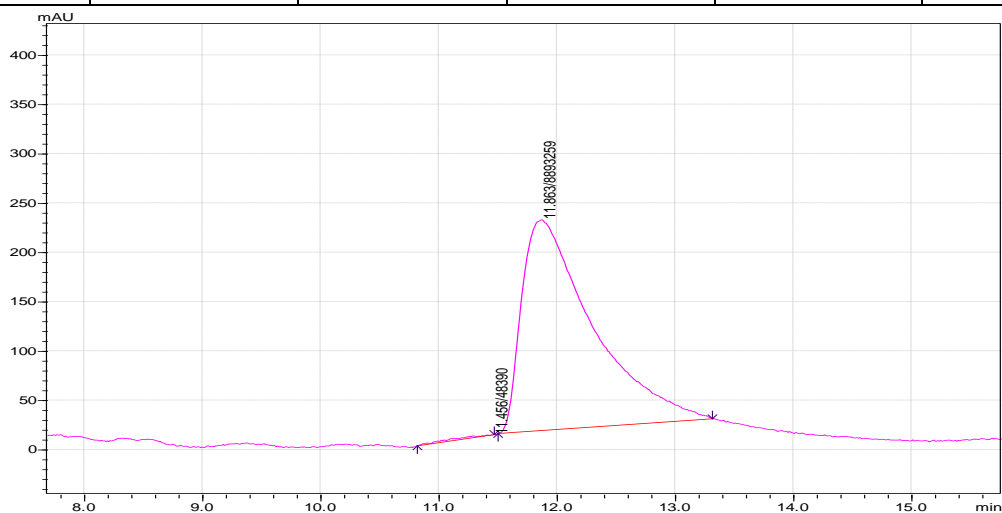

| Peak | Ret. Time | Area    | Peak Start | Peak End | Area%   |
|------|-----------|---------|------------|----------|---------|
| 1    | 11.456    | 48390   | 10.816     | 11.467   | 0.5412  |
| 2    | 11.863    | 8893259 | 11.499     | 13.312   | 99.4588 |

**2-(3,4-Difluorophenyl)-3,3,3-trifluoro-2-(nitromethyl)propanenitrile (2j)**

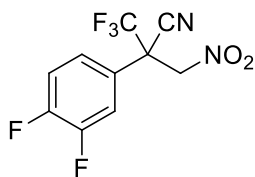

Colorless liquid;  $[\alpha]_D^{30} = +32.4$  (c 0.8,  $\text{CHCl}_3$ );  $^1\text{H NMR}$  (500 MHz,  $\text{CDCl}_3$ )  $\delta = 7.50$ - $7.32$  (m, 3H),  $5.24$ - $5.16$  (dd,  $J = 23.5, 14.5$  Hz, 2H) ppm;  $^{19}\text{F NMR}$  (376 MHz,  $\text{CDCl}_3$ )  $\delta = -70.54$  (s, 3F),  $-131.93$  to  $-132.04$  (m, 1F),  $-132.49$  to  $-132.59$  (m, 3F) ppm;  $^{13}\text{C NMR}$  (125 MHz,  $\text{CDCl}_3$ )  $\delta = 152.9$  (d,  $J = 11.3$  Hz),  $151.7$  (d,  $J = 12.2$  Hz),  $150.9$  (d,  $J = 11.2$  Hz),  $149.7$  (d,  $J = 12.2$  Hz),  $123.9$ ,  $123.0$ ,  $122.5$ ,  $120.7$ ,  $119.0$  (d,  $J = 17.8$  Hz),  $117.2$  (d,  $J = 20.1$  Hz),  $112.7$ ,  $73.6$ ,  $51.3$  (q,  $J = 29.7$  Hz) ppm; HRMS (ESI+): m/z Calcd. for  $\text{C}_{10}\text{H}_6\text{F}_5\text{N}_2\text{O}_2$   $[\text{M}+\text{H}]^+$  281.0349, Found: 281.0345; CHIRALCEL OD-H column, hexane/2-propanol = 80:20, flow rate 1 mL/min,  $t_{r1}$  (minor) = 10.25 min,  $t_{r2}$  (major) = 14.01 min.

### HPLC Chromatograms

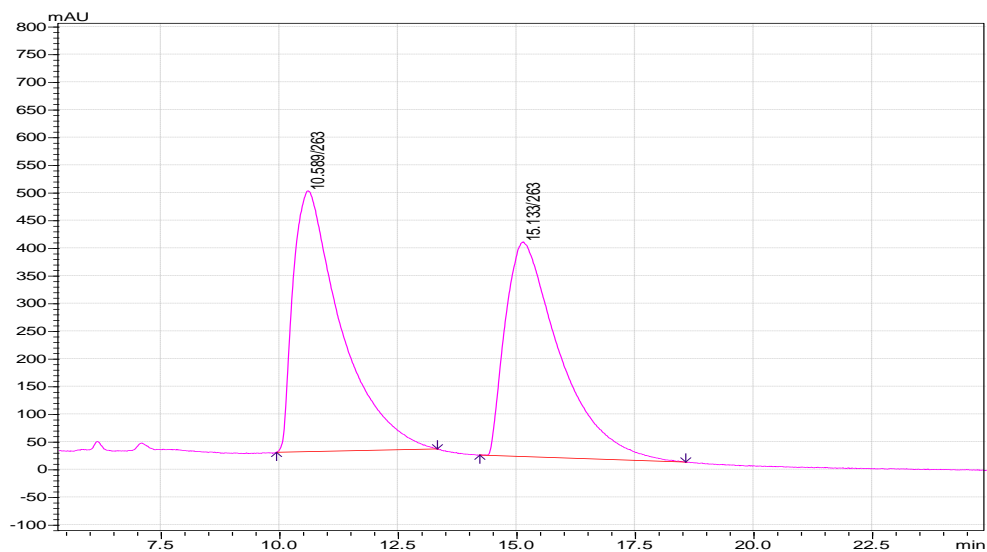

| Peak | Ret. Time | Area     | Peak Start | Peak End | Area%   |
|------|-----------|----------|------------|----------|---------|
| 1    | 10.589    | 33082550 | 9.931      | 13.323   | 51.6594 |
| 2    | 15.133    | 30957186 | 14.219     | 18.560   | 48.3406 |



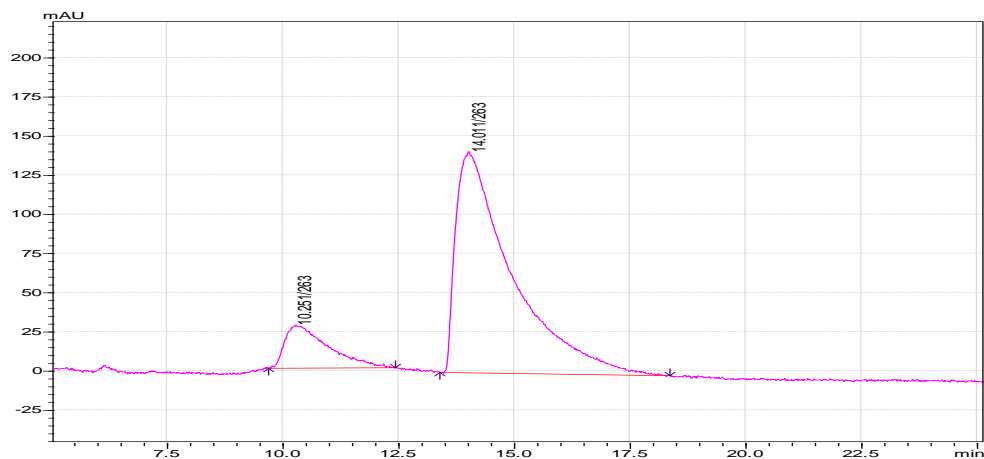

| Peak | Ret. Time | Area     | Peak Start | Peak End | Area%   |
|------|-----------|----------|------------|----------|---------|
| 1    | 10.251    | 1783763  | 9.685      | 12.427   | 13.0371 |
| 2    | 14.011    | 11898442 | 13.387     | 18.357   | 86.9629 |

### 3,3,3-Trifluoro-2-(nitromethyl)-2-(3-(trifluoromethyl)phenyl)-propanenitrile (2k):

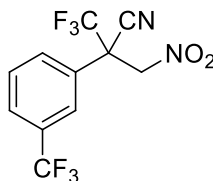

White solid; m.p. = 86-88 °C;  $[\alpha]_D^{27} = +13.5$  (c 0.4,  $\text{CHCl}_3$ );  $^1\text{H NMR}$  (500 MHz,  $\text{CDCl}_3$ )  $\delta = 7.85$ -7.82 (m, 3H), 7.72-7.68(m, 1H), 5.29-5.28 (m, 2H) ppm;  $^{19}\text{F NMR}$  (376 MHz,  $\text{CDCl}_3$ )  $\delta = -62.89$  (s, 3F), -70.33 (s, 3F) ppm;  $^{13}\text{C NMR}$  (125 MHz,  $\text{CDCl}_3$ )  $\delta = 132.5$ (q,  $J = 33.1$  Hz), 130.6, 130.5, 128.1, 127.1, 126.3, 124.1, 124.0, 123.0, 122.0, 120.8, 112.7, 73.6, 52.9 (q,  $J = 30.0$  Hz), ppm; HRMS (ESI+): m/z Calcd. for  $\text{C}_{11}\text{H}_7\text{F}_6\text{N}_2\text{O}_2$   $[\text{M}+\text{H}]^+$  313.0412, Found: 313.0404; CHIRALCEL OD-H column, *n*-hexane/2-propanol = 80:20, flow rate 1 mL/min,  $t_{r1}$  (minor) = 9.12 min,  $t_{r2}$  (major) = 16.47 min.

### HPLC Chromatograms

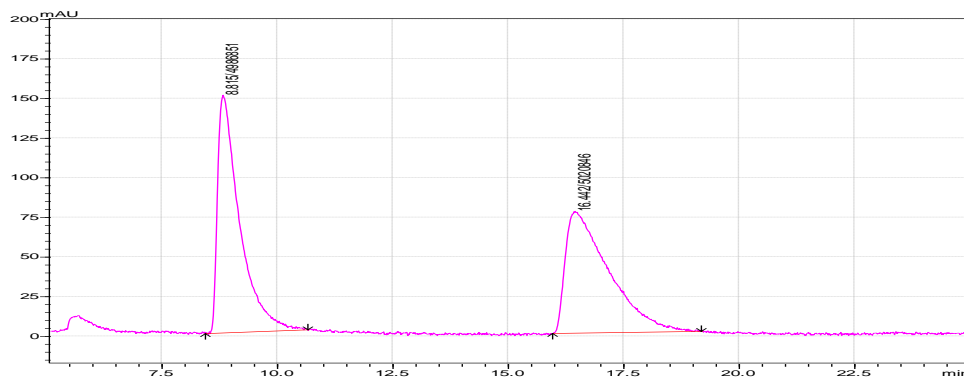

| Peak | Ret. Time | Area    | Peak Start | Peak End | Area%   |
|------|-----------|---------|------------|----------|---------|
| 1    | 8.815     | 4986851 | 8.437      | 10.656   | 49.8302 |
| 2    | 16.442    | 5020846 | 15.957     | 19.179   | 50.1698 |

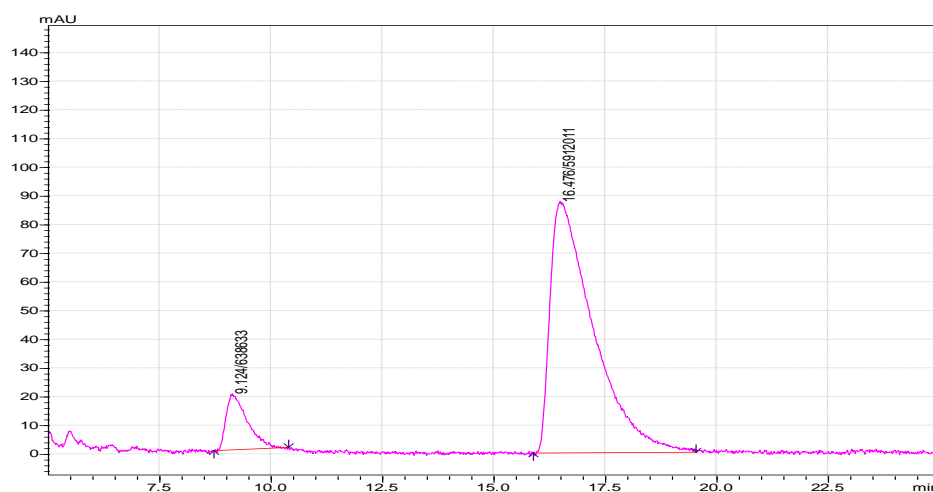

| Peak | Ret. Time | Area    | Peak Start | Peak End | Area%   |
|------|-----------|---------|------------|----------|---------|
| 1    | 9.124     | 638633  | 8.715      | 10.389   | 9.7492  |
| 2    | 16.476    | 5912011 | 15.883     | 19.531   | 90.2508 |

### 2-Benzyl-3,3,3-trifluoro-2-(nitromethyl)propanenitrile (2l):

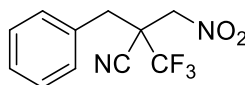

White solid; m.p. = 56-58 °C;  $[\alpha]_D^{27} = +2.6$  (c 0.5, CHCl<sub>3</sub>); <sup>1</sup>H NMR (500 MHz, CDCl<sub>3</sub>)  $\delta$  = 7.42-7.36 (m, 5H), 4.72-4.69 (d,  $J$  = 13.5 Hz, 1H), 4.58-4.55 (d,  $J$  = 13.5 Hz, 1H), 3.47-3.44 (d,  $J$  = 14.5, 1H), 3.30-3.27 (d,  $J$  = 14 Hz, 1H) ppm; <sup>19</sup>F NMR (376 MHz, CDCl<sub>3</sub>)  $\delta$  = -70.37 (s, 3F) ppm; <sup>13</sup>C NMR (125 MHz, CDCl<sub>3</sub>)  $\delta$  = 130.5, 130.0, 129.3, 129.1, 123.9, 121.6, 112.8, 72.8, 48.1, 47.9, 36.3 ppm; HRMS (ESI+): m/z Calcd. for C<sub>11</sub>H<sub>10</sub>F<sub>3</sub>N<sub>2</sub>O<sub>2</sub> [M+H]<sup>+</sup> 259.0694, Found: 259.0701; CHIRALCEL OD-H column, *n*-hexane/2-propanol = 80:20, flow rate 1 mL/min,  $t_{r1}$  (minor) = 13.53 min,  $t_{r2}$  (major) = 17.83 min.

### HPLC Chromatograms

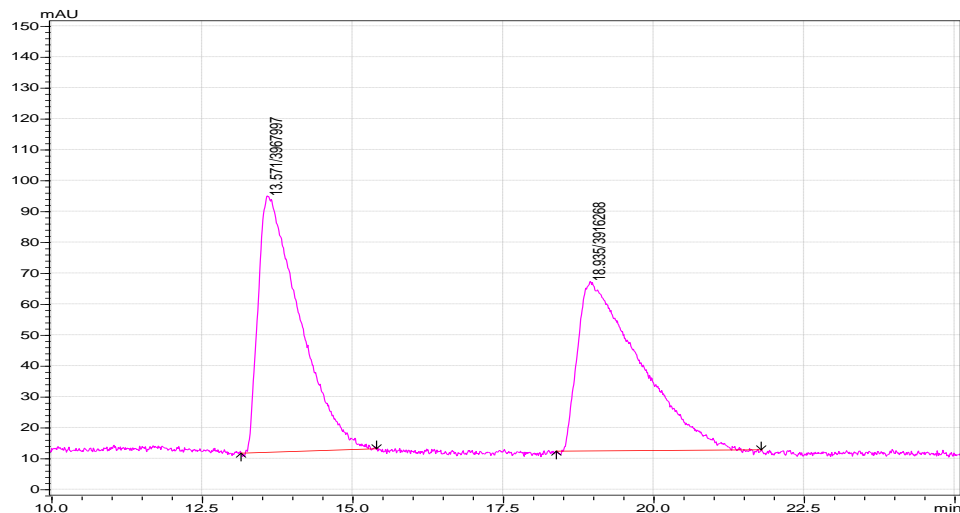

| Peak | Ret. Time | Area    | Peak Start | Peak End | Area%   |
|------|-----------|---------|------------|----------|---------|
| 1    | 13.571    | 3967997 | 13.141     | 15.392   | 50.3281 |
| 2    | 18.935    | 3916268 | 18.379     | 21.781   | 49.6719 |

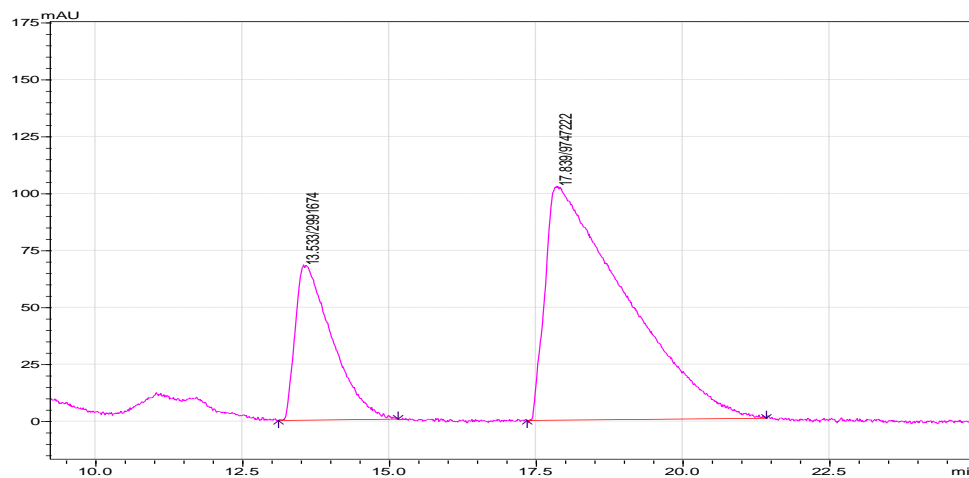

| Peak | Ret. Time | Area    | Peak Start | Peak End | Area%   |
|------|-----------|---------|------------|----------|---------|
| 1    | 13.533    | 2991674 | 13.109     | 15.147   | 23.4846 |
| 2    | 17.839    | 9747222 | 17.344     | 21.419   | 76.5154 |

### 3. Synthesis of (S)-2-(((*tert*-Butoxycarbonyl)amino)methyl)-3,3,3-trifluoro-2-phenylpropanoic acid (5a):<sup>1</sup>

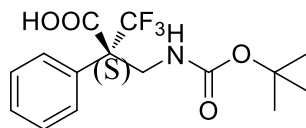

Zinc powder (15eq.) and 3 mL of 6 M HCl (aq.) were added to a stirring solution of (*S*)-3,3,3-trifluoro-2-(nitromethyl)-2-phenylpropanenitrile (**2a**) (0.5 mmol) in ethanol (5ml). After 1 h excess Zinc powder removed by filtration and ethanol was removed in vacuo. NaOH (10%) was added to the above mixture until pH 10. The aqueous layer was extracted with DCM (15 mL x 3). The organic layer was washed with brine, dried over anhydrous Na<sub>2</sub>SO<sub>4</sub> and concentrated to give amine (**3a**) which was used for next step without purification.

To the above crude amine was added 3 mL H<sub>2</sub>SO<sub>4</sub> (75%) and heated under reflux for 2 h. The reaction mixture was allowed to cool to 0 °C and carefully maintain to pH 10 with 40% NaOH. Dioxane (3 mL) was added to above reaction mixture followed by (Boc)<sub>2</sub>O (1.1 eq. to **2a**). The solution was allowed to attain to room temperature and stirred for further one . The dioxane was removed in vacuo, the aqueous layer was acidified (pH 2) with 1 M NaHSO<sub>4</sub> and extracted with ethyl acetate (3 x 15 mL). The organic layer was dried and concentrated in vacuo. The residue was purified by silica gel chromatography using EtOAc/hexane to afford as a white solid (**5a**) (36% yield from **2a**).

White solid; m.p. = 122-124 °C; [ $\alpha$ ]<sub>D</sub><sup>27</sup> = +5.6 (c 0.9, CHCl<sub>3</sub>); <sup>1</sup>H NMR (200 MHz, CDCl<sub>3</sub>)  $\delta$  = 7.39-7.35 (m, 5H), 5.32-5.26 (br, 1H), 3.94-3.91 (d, *J* = 6.2 Hz, 2H), 1.32 (s, 9H) ppm; <sup>19</sup>F NMR (376 MHz, CDCl<sub>3</sub>)  $\delta$  = -65.23 (s, 3F); <sup>13</sup>C NMR (125 MHz, CDCl<sub>3</sub>)  $\delta$  = 170.1, 155.4, 132.6, 128.7, 128.5, 128.3, 127.9, 124.4, 79.5, 61.9 (q, *J* = 23.1 Hz), 43.6, 28.1 ppm; HRMS (ESI+) *m/z* Calcd. for C<sub>15</sub>H<sub>19</sub>F<sub>3</sub>NO<sub>4</sub> [M+H]<sup>+</sup> 334.1266, Found: 334.1262.

1.(a) J. X. Qiu, E. J. Petersson, E. E. Matthews and A. Schepartz, *J. Am. Chem. Soc.*, 2006, **128**, 11338; (b) L. Lin, W. Yin, X. Fu, J. Zhang, X. Ma and R. Wang, *Org. Biomol. Chem.*, 2012, **10**, 83.

#### 4. Copy of $^1\text{H}$ and $^{13}\text{C}$ NMR Spectra for product

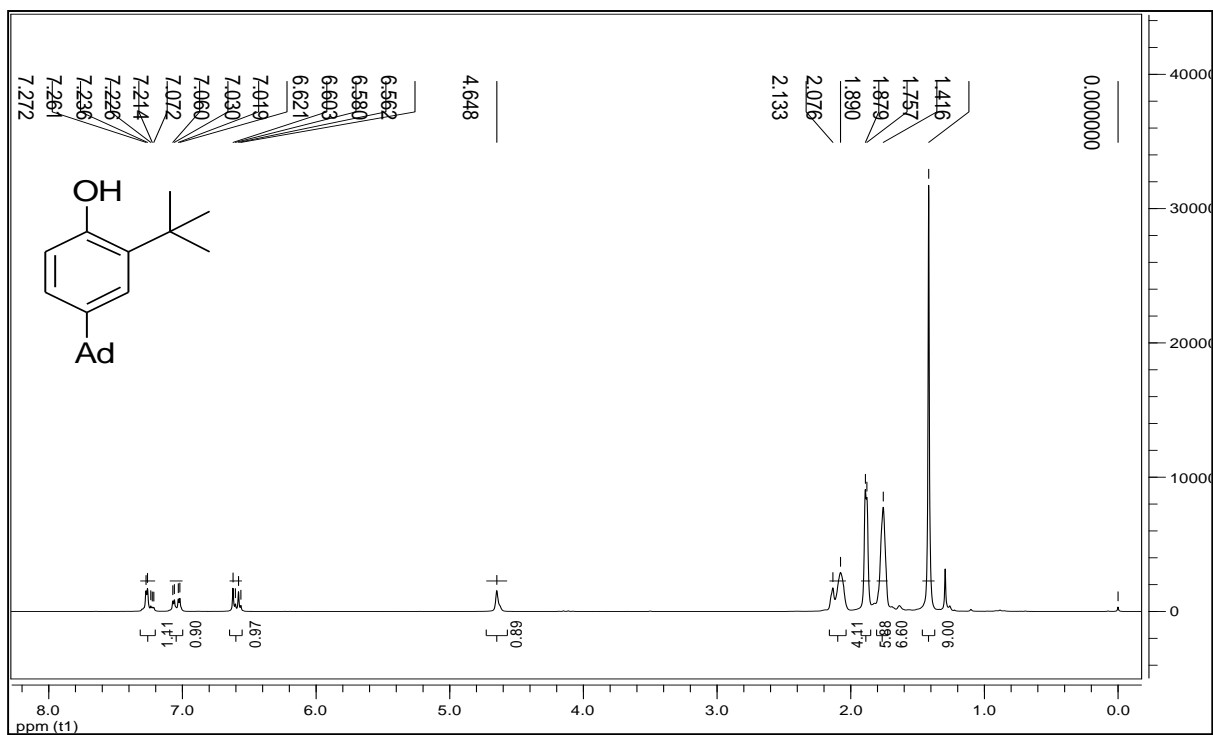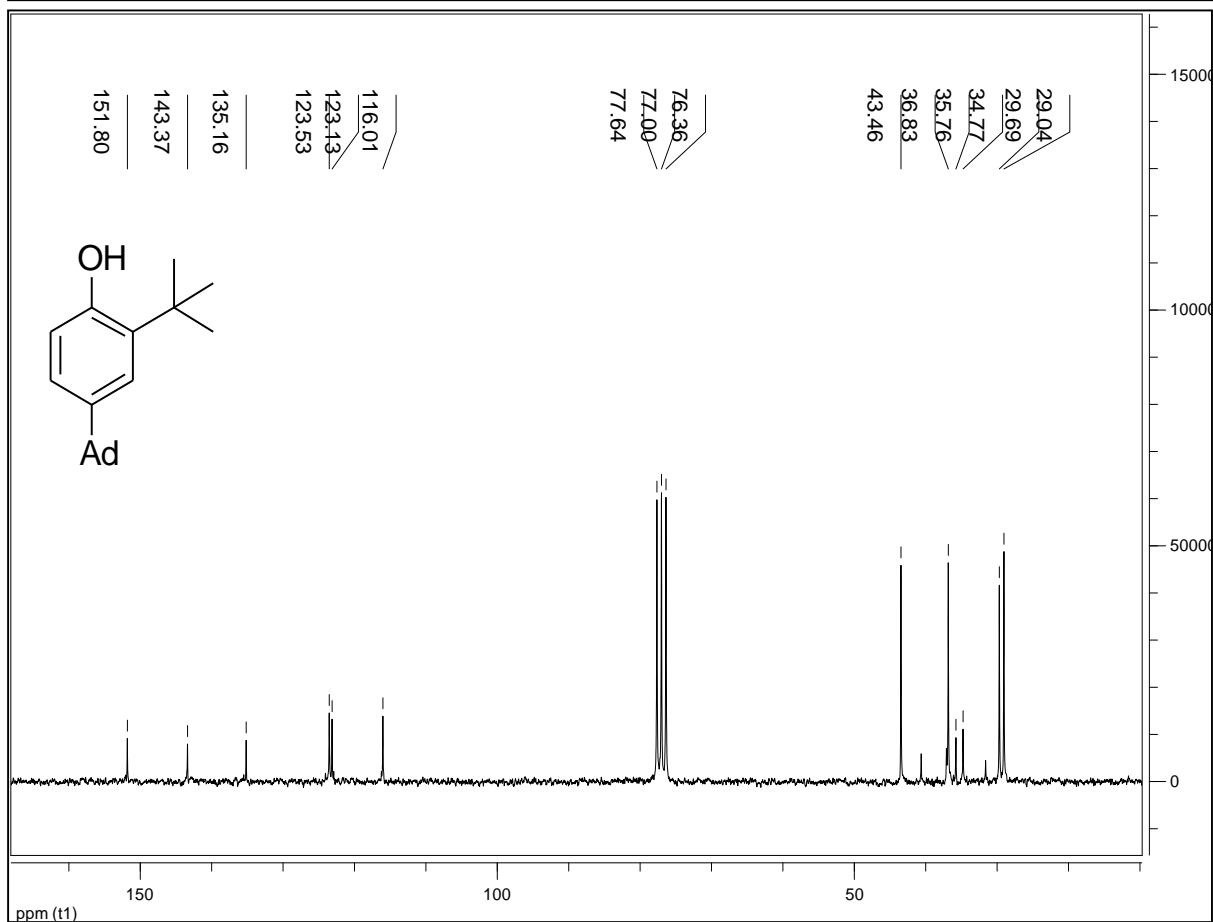

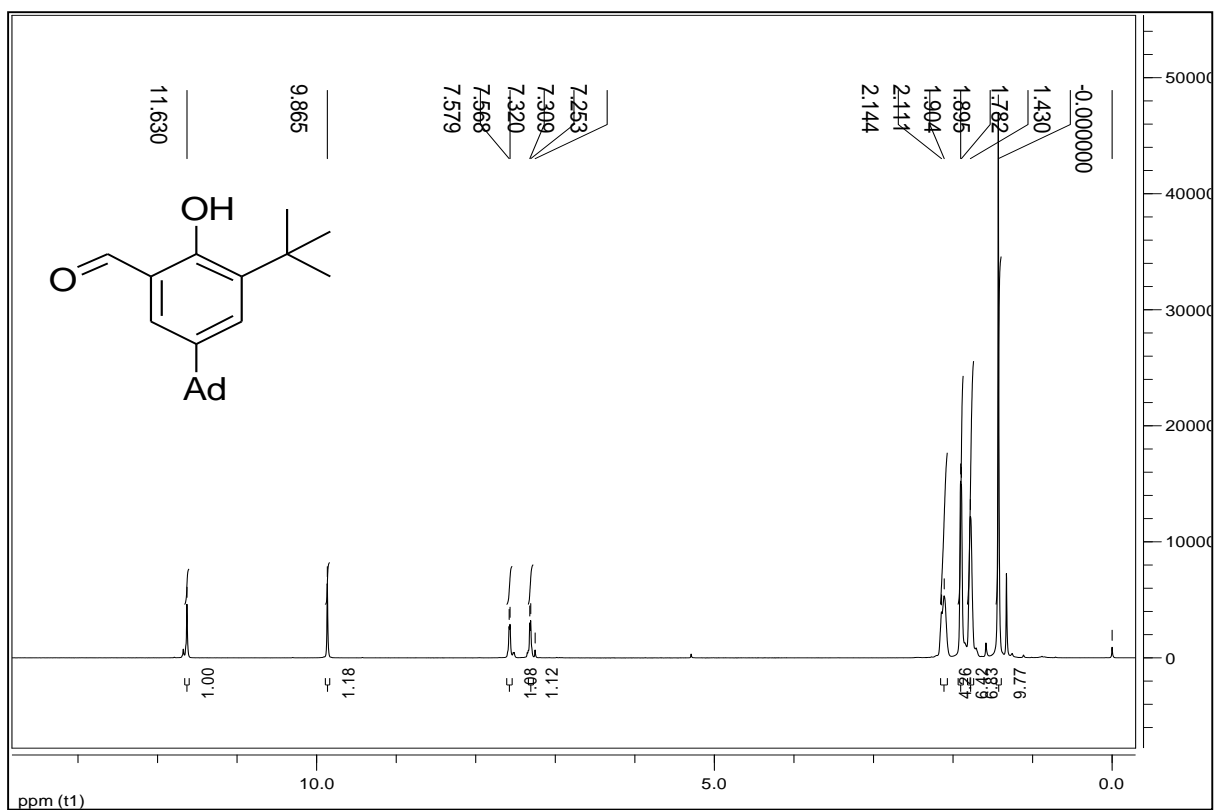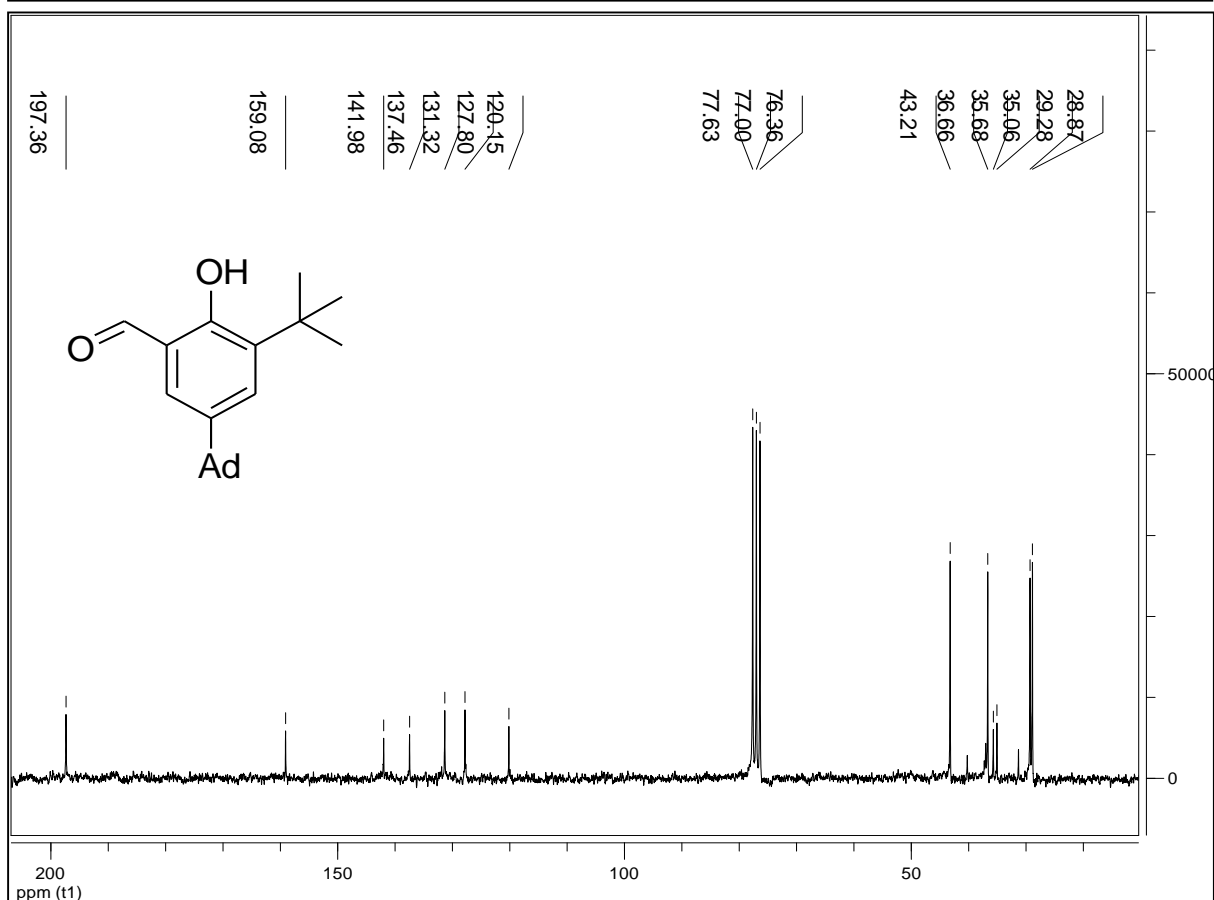

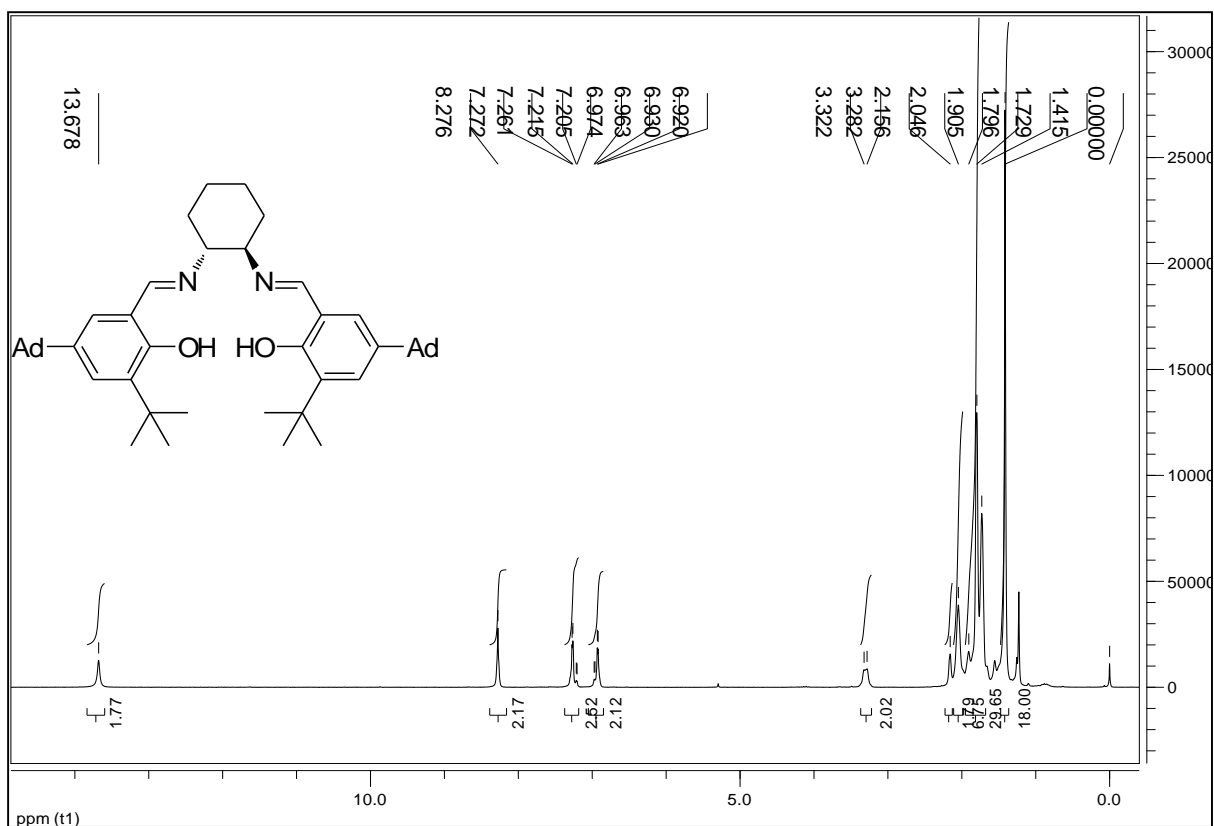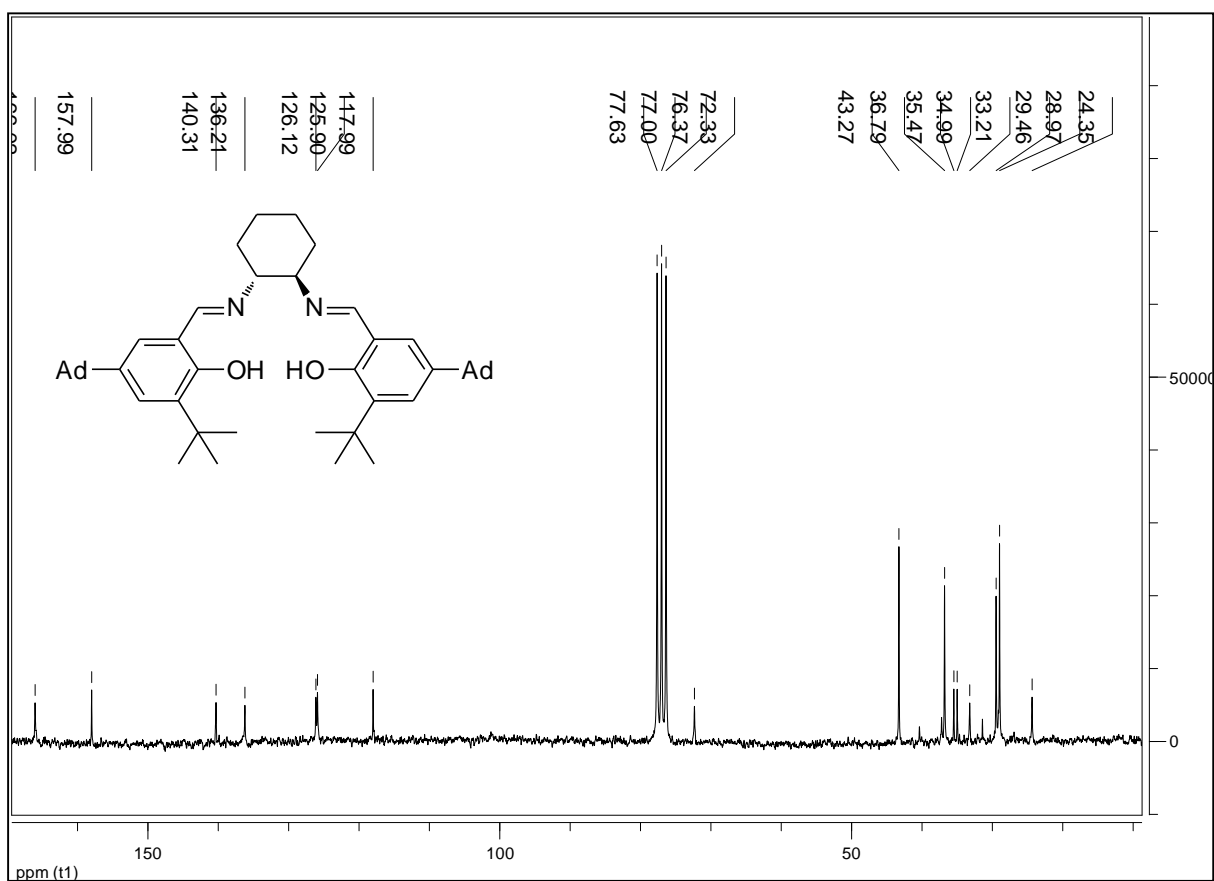

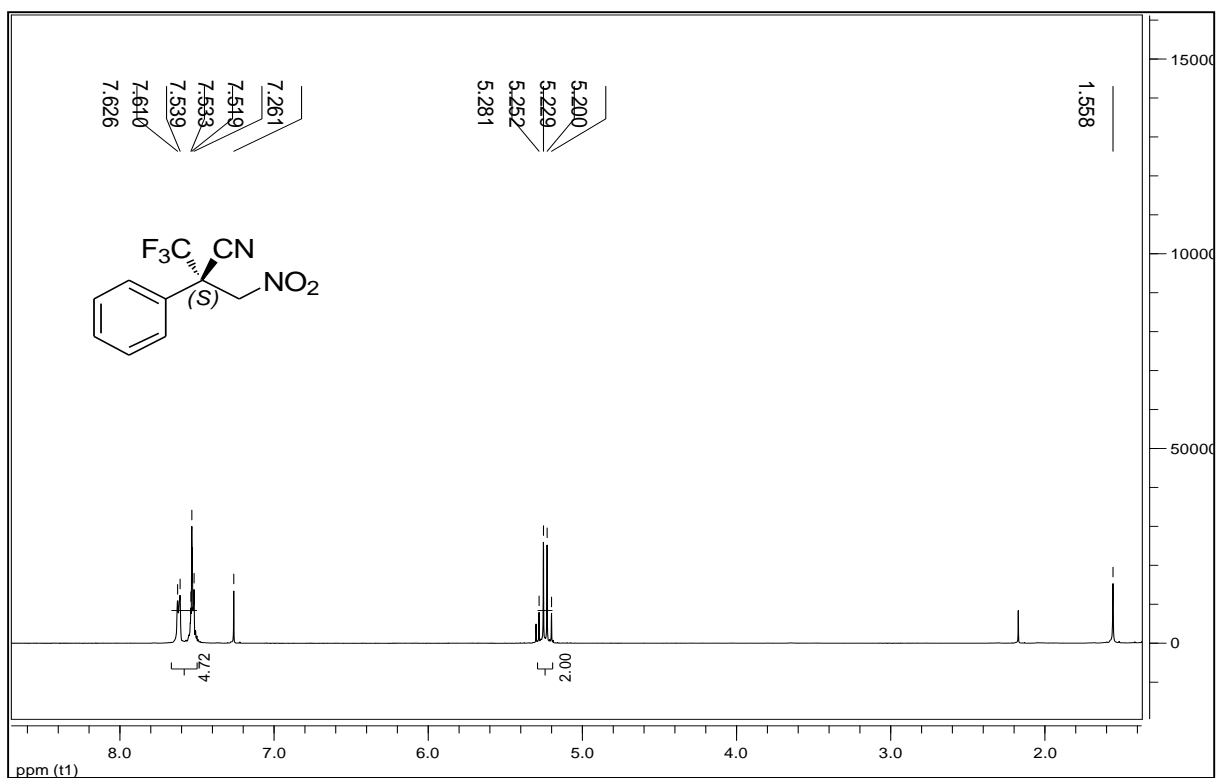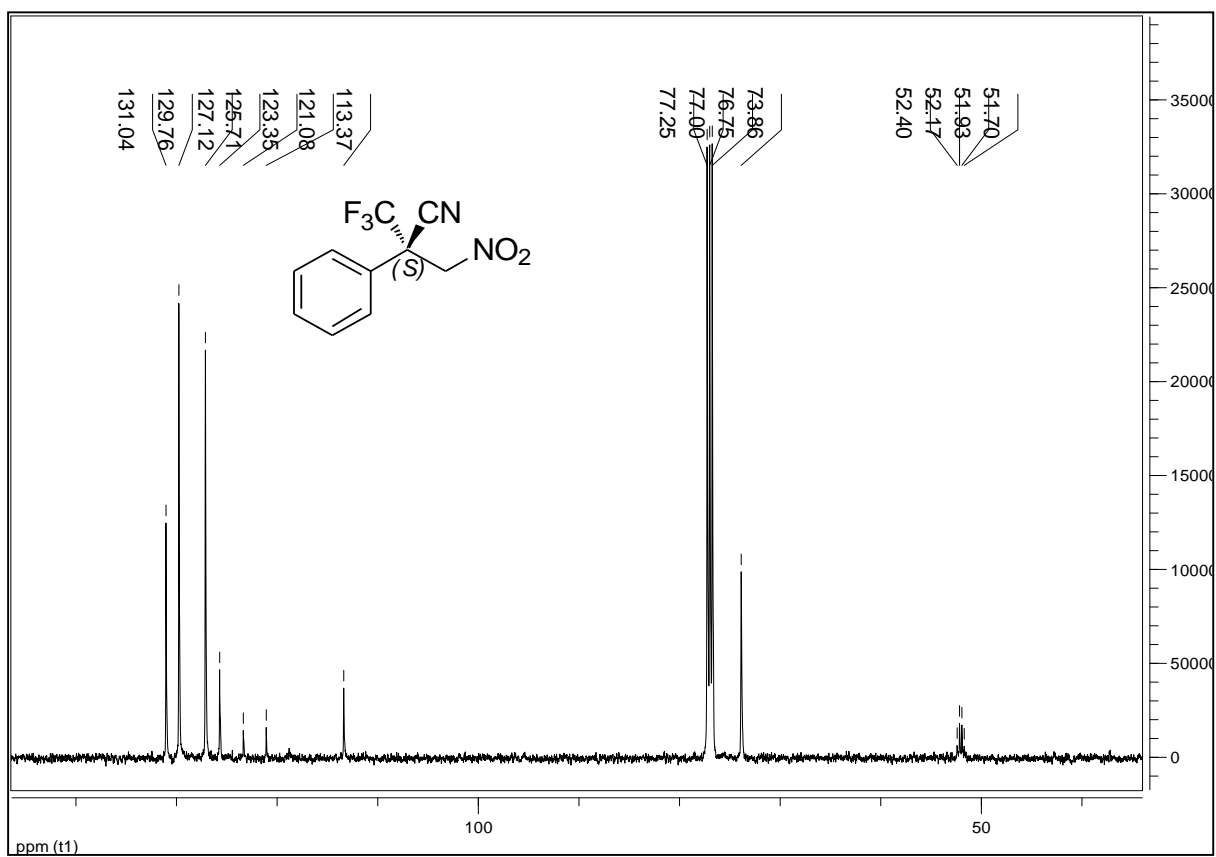



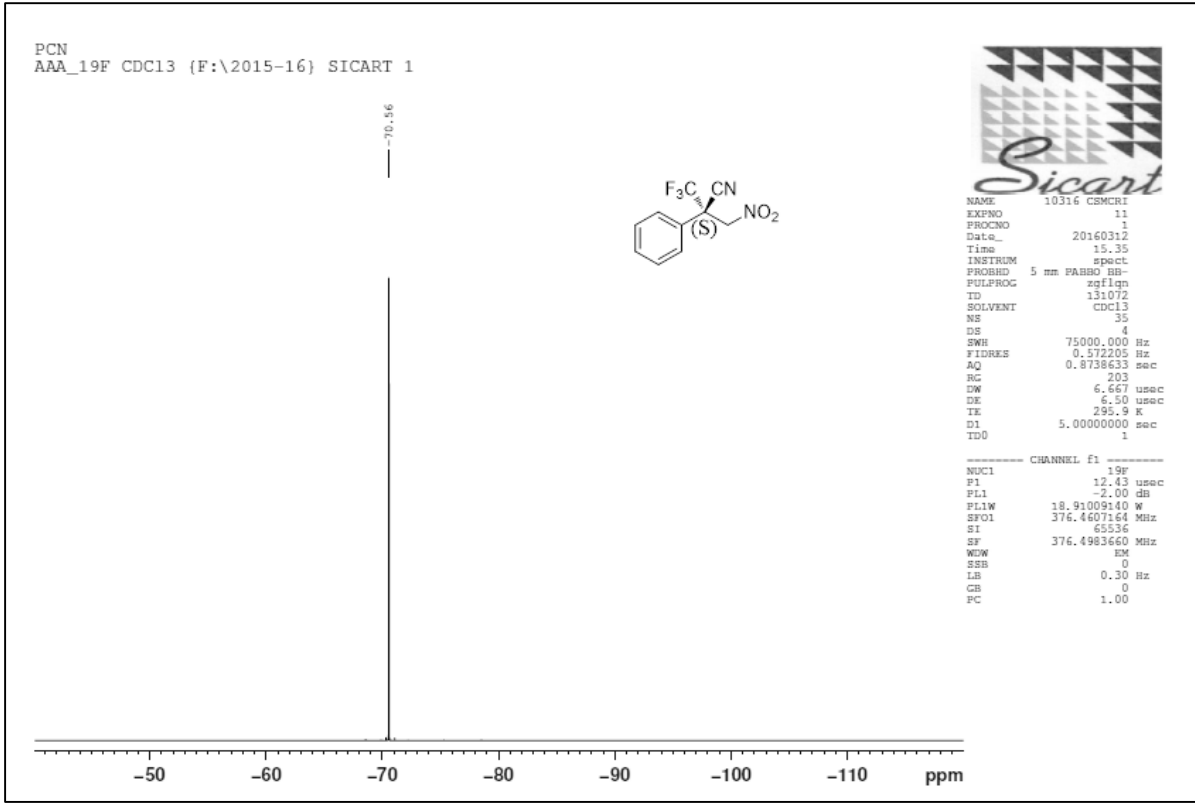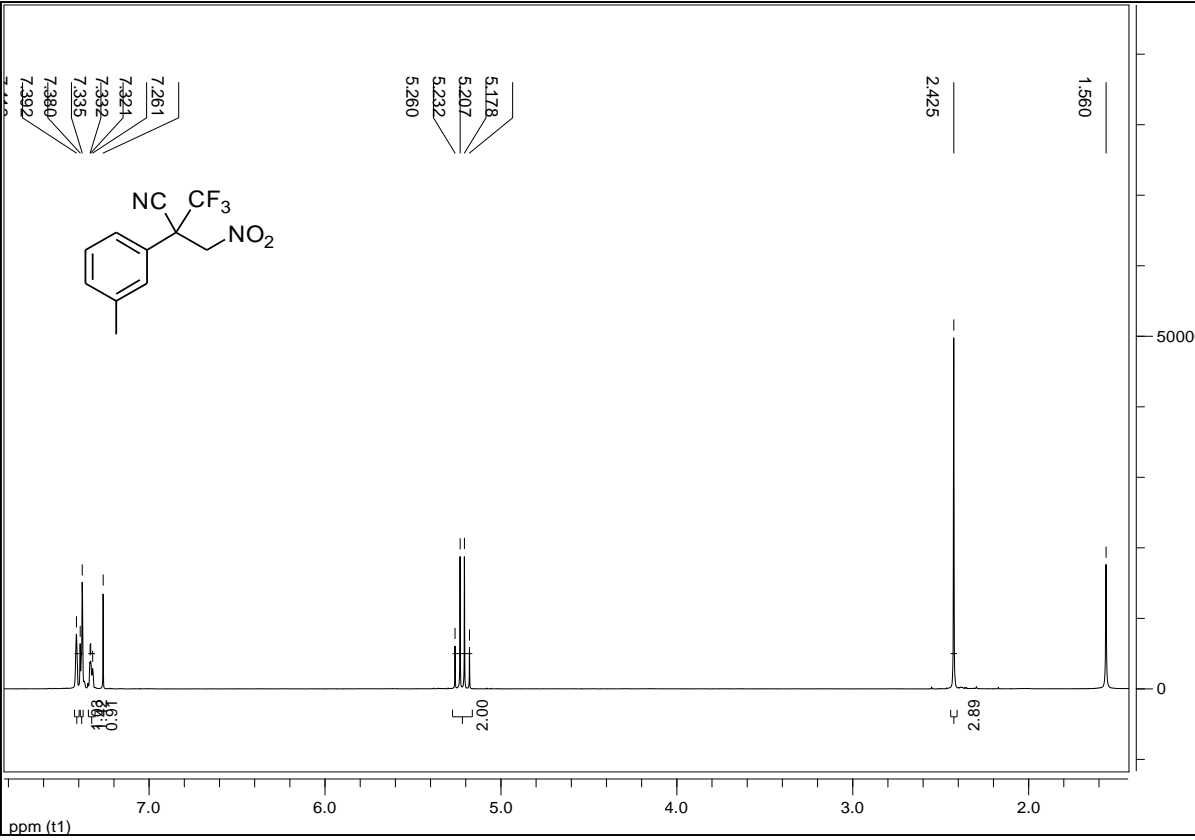

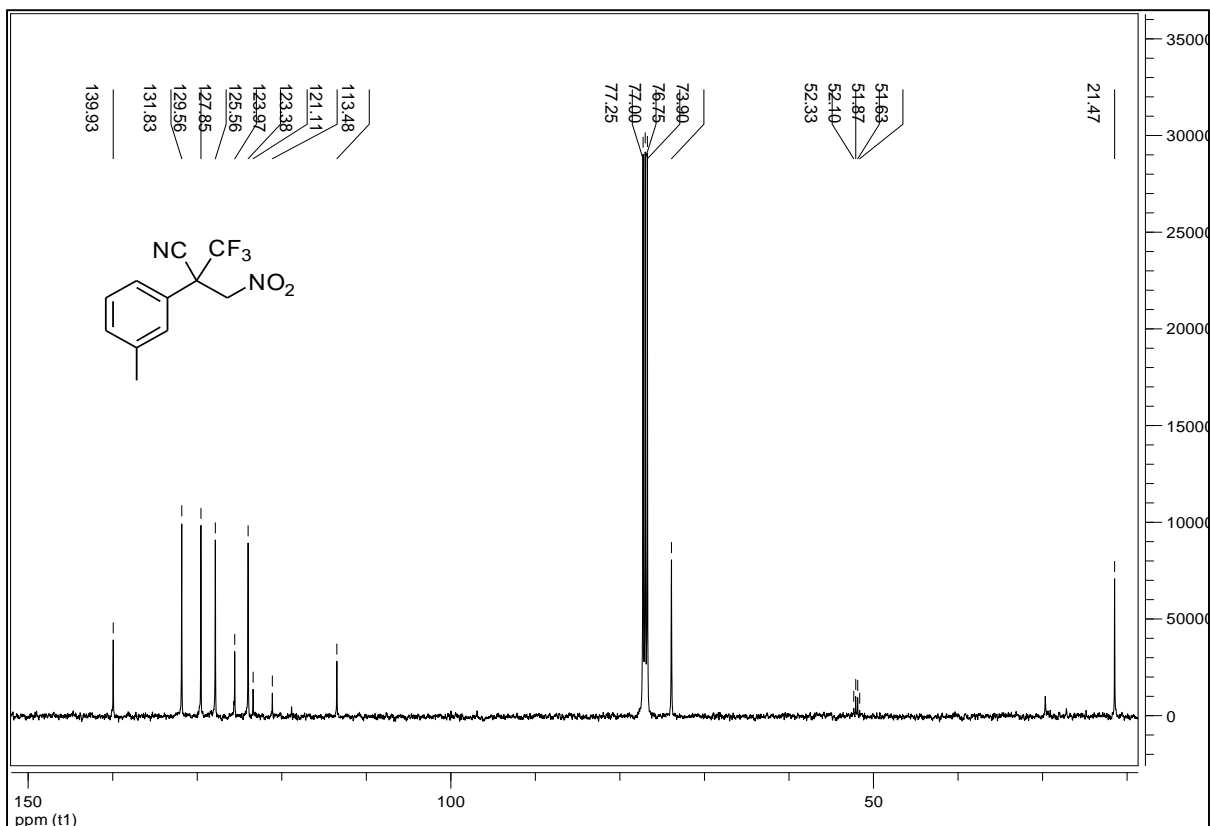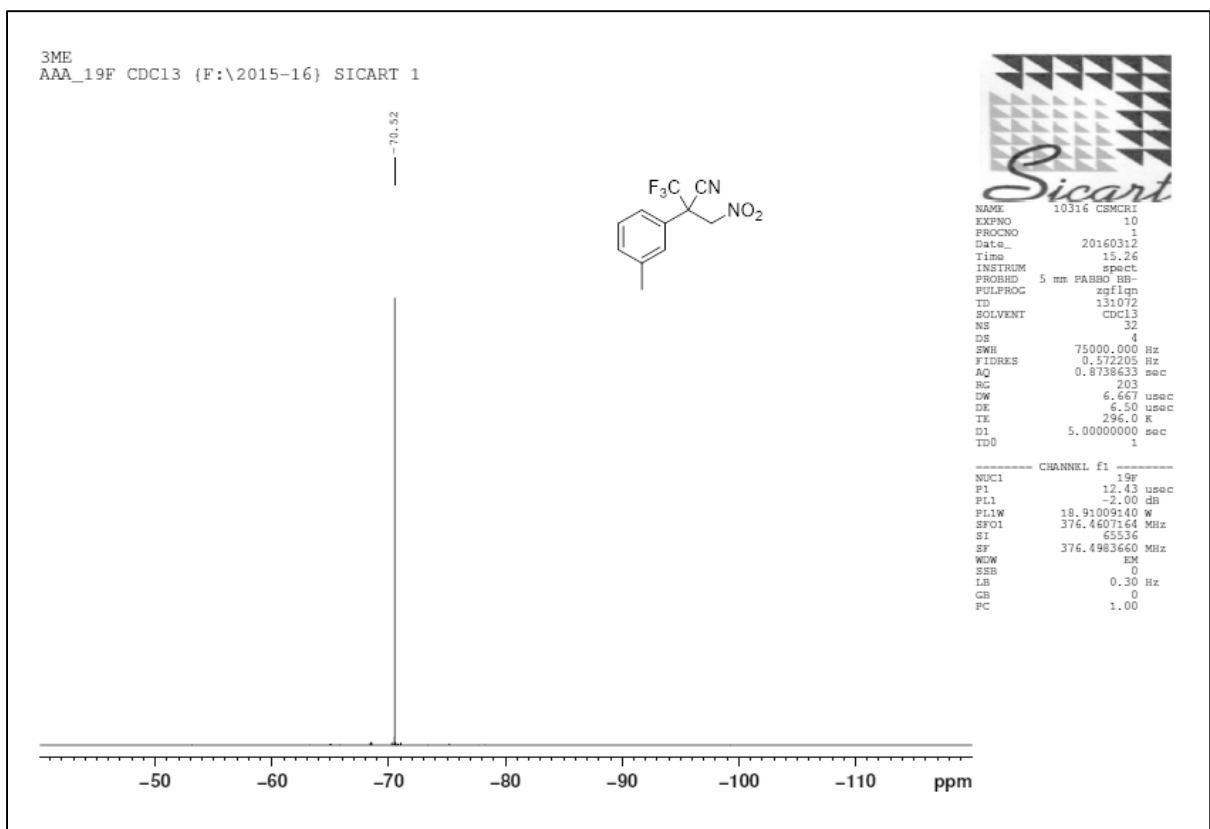

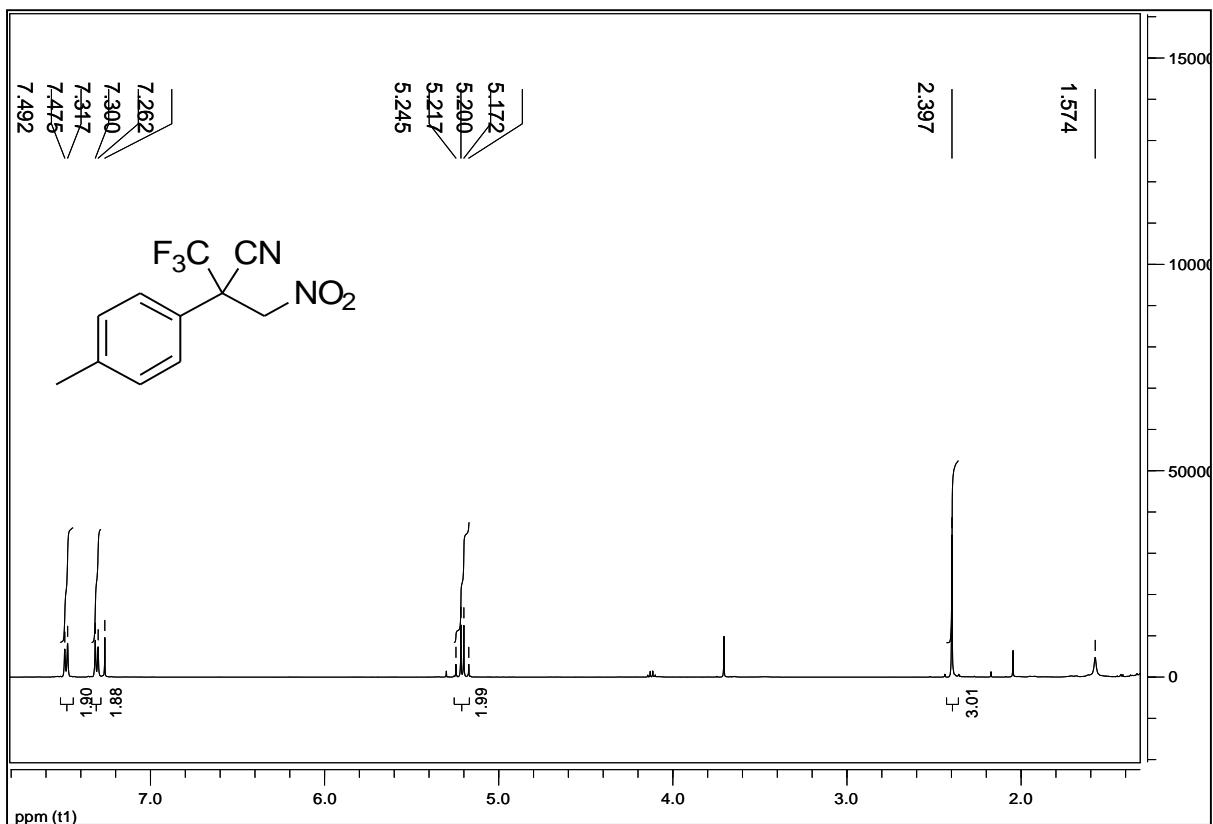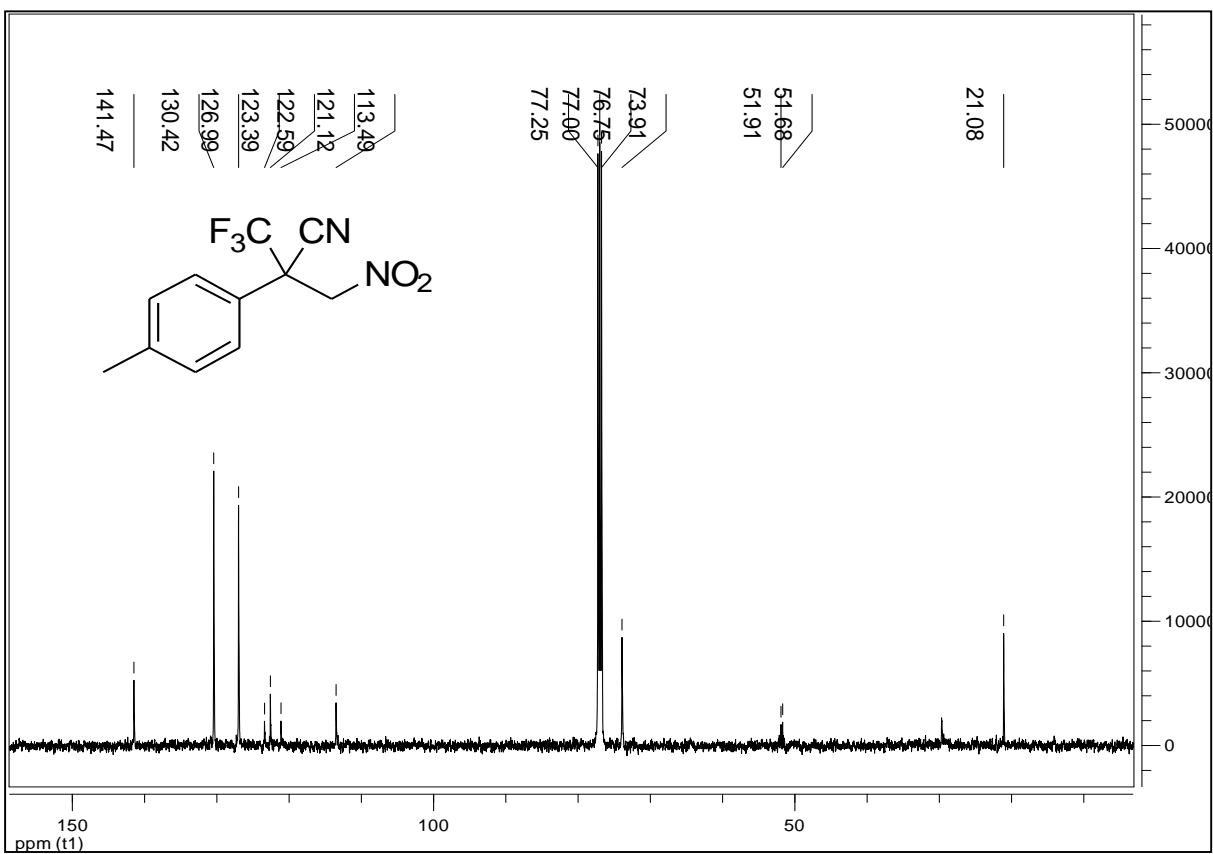



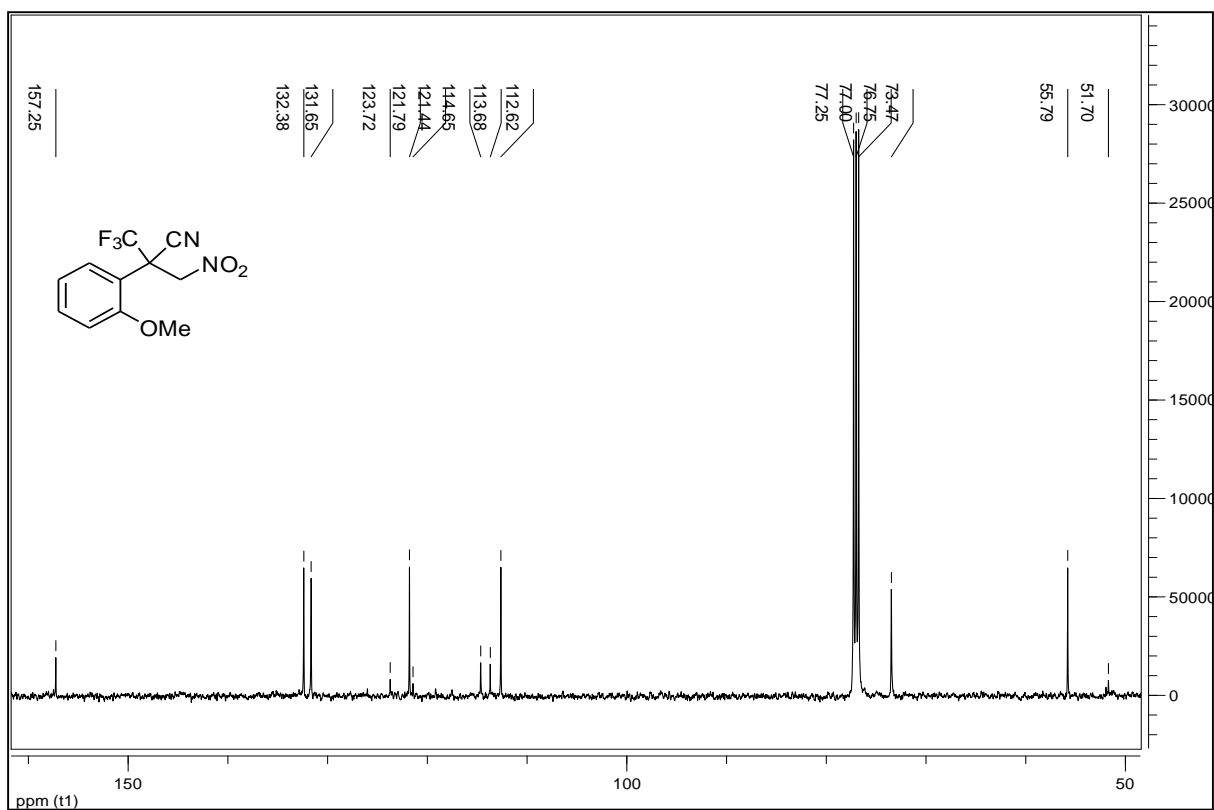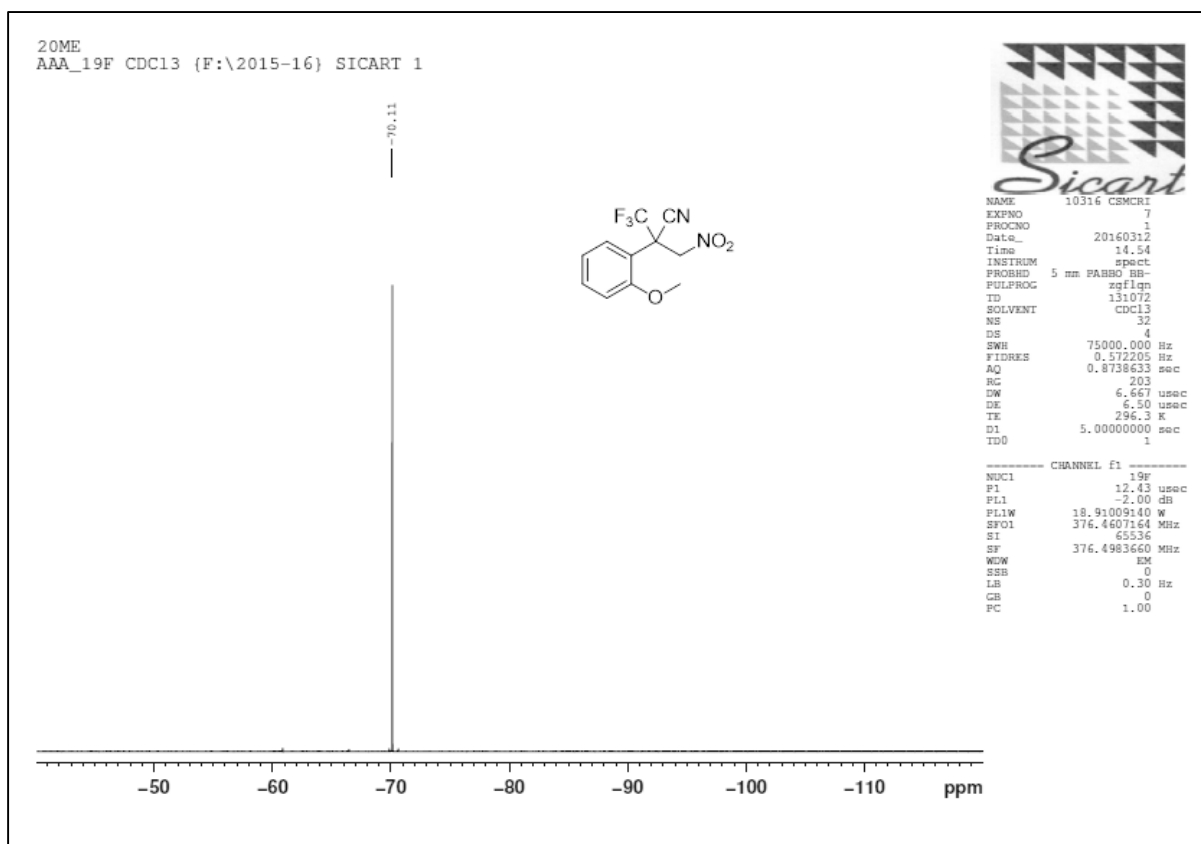

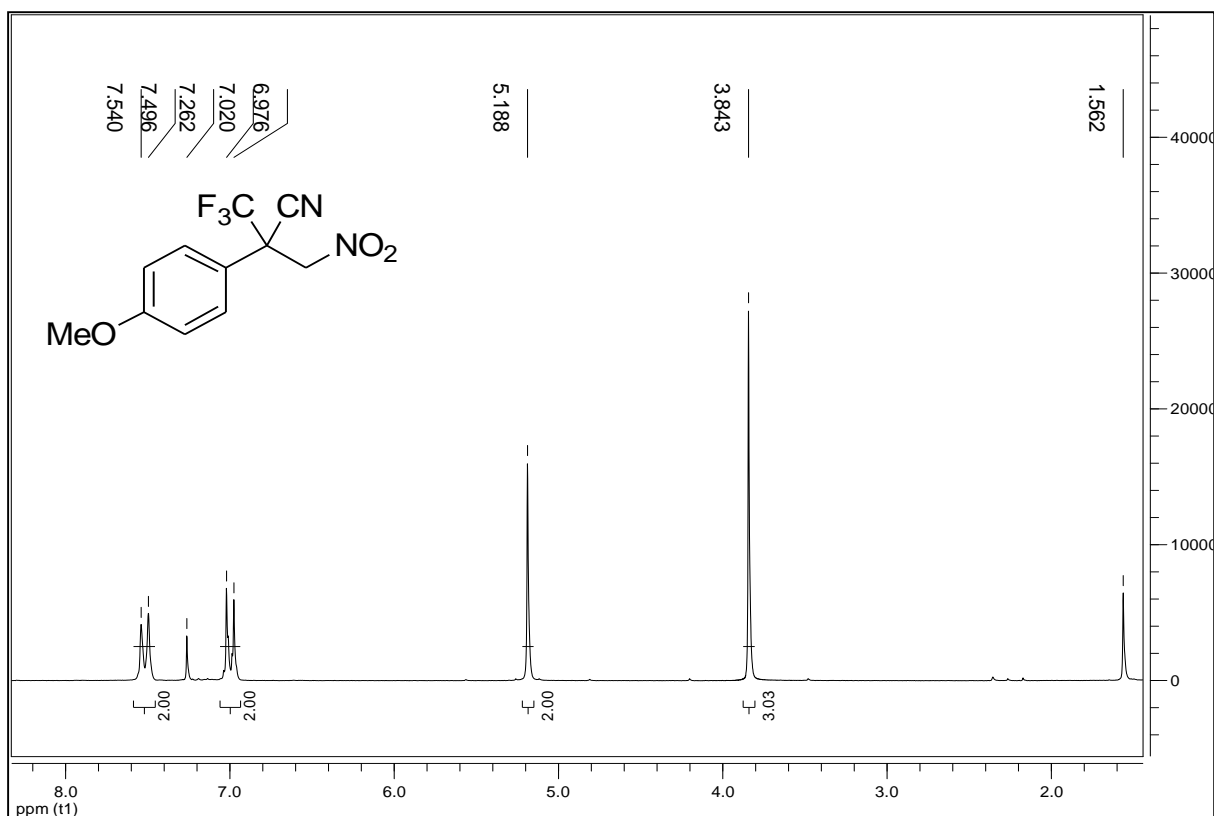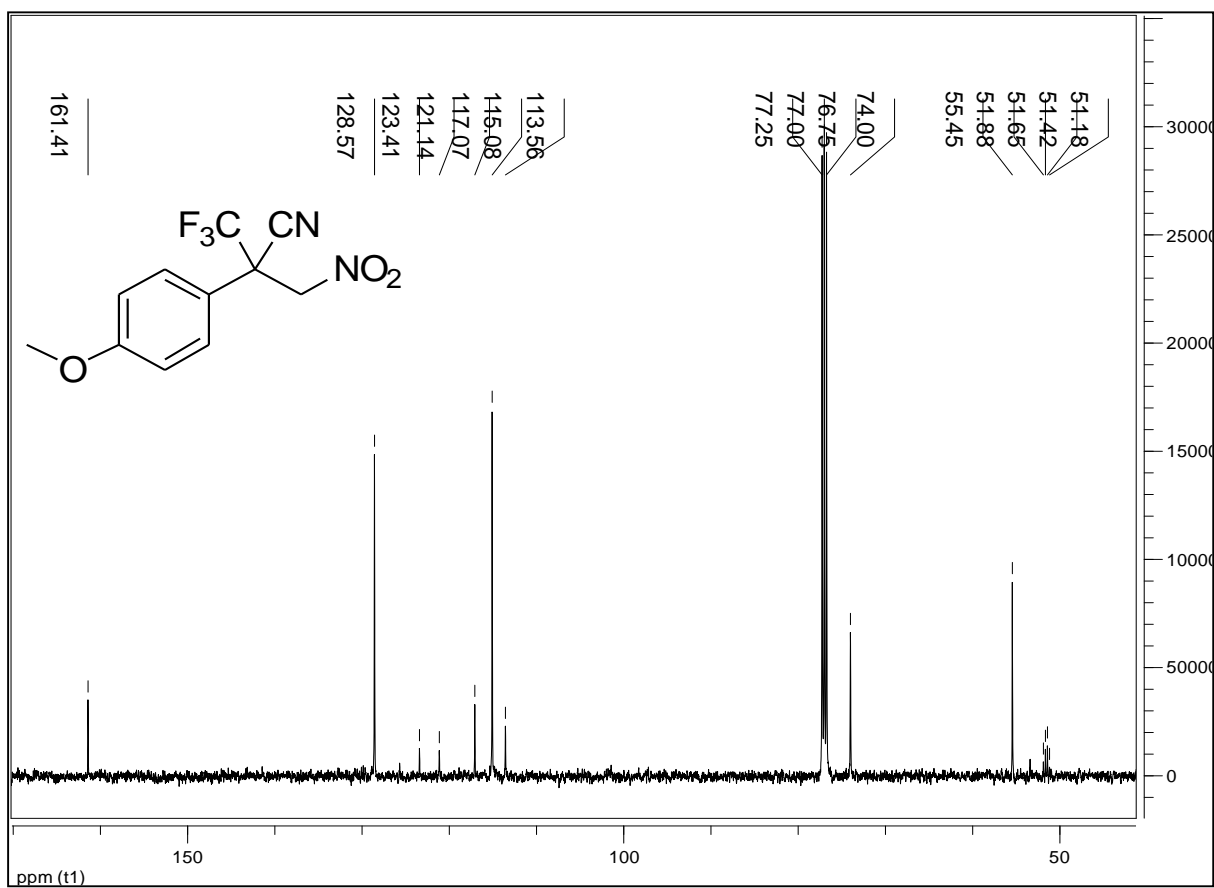

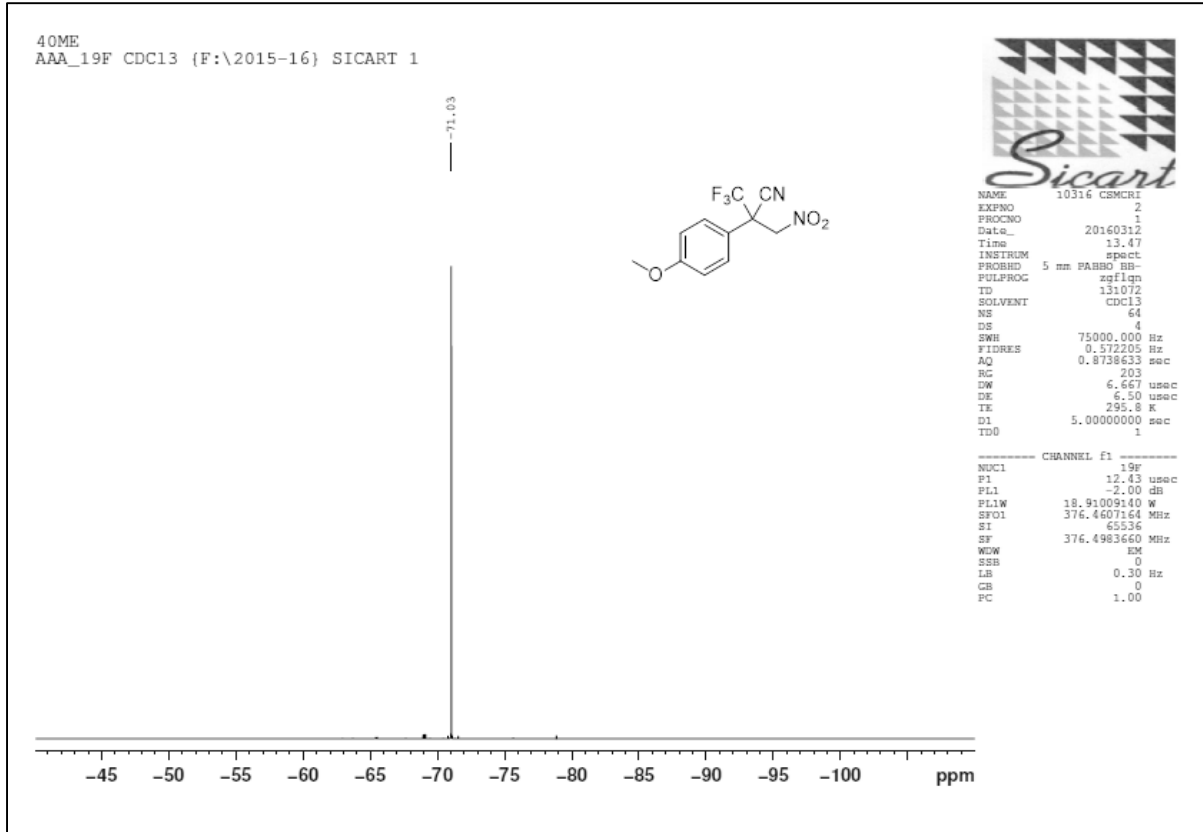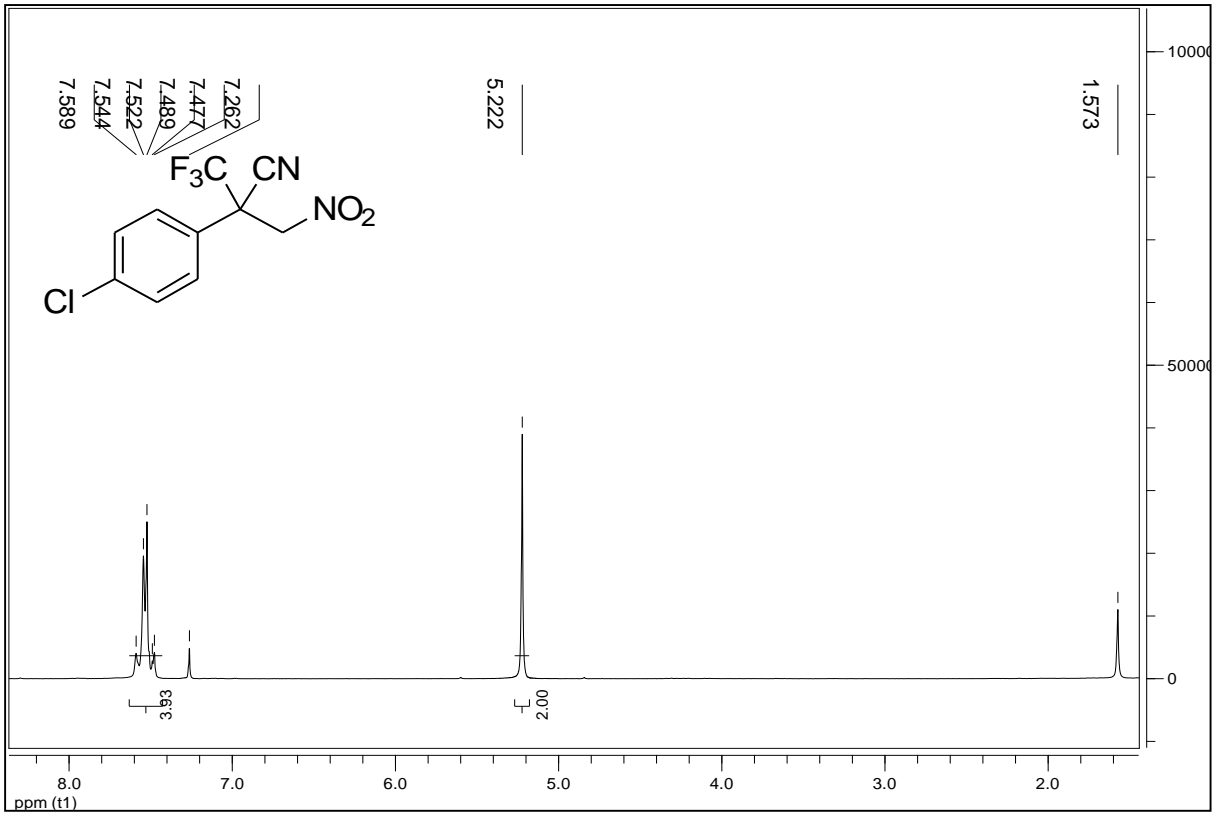

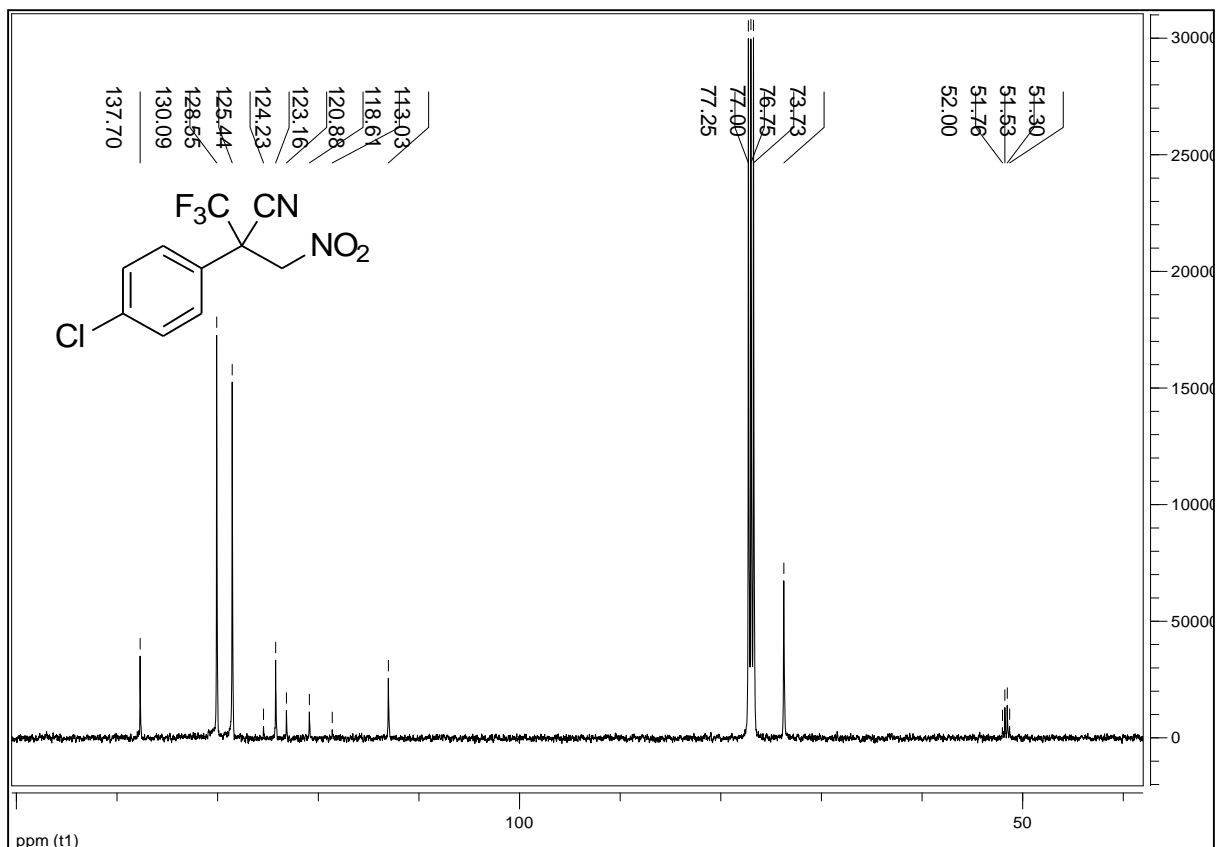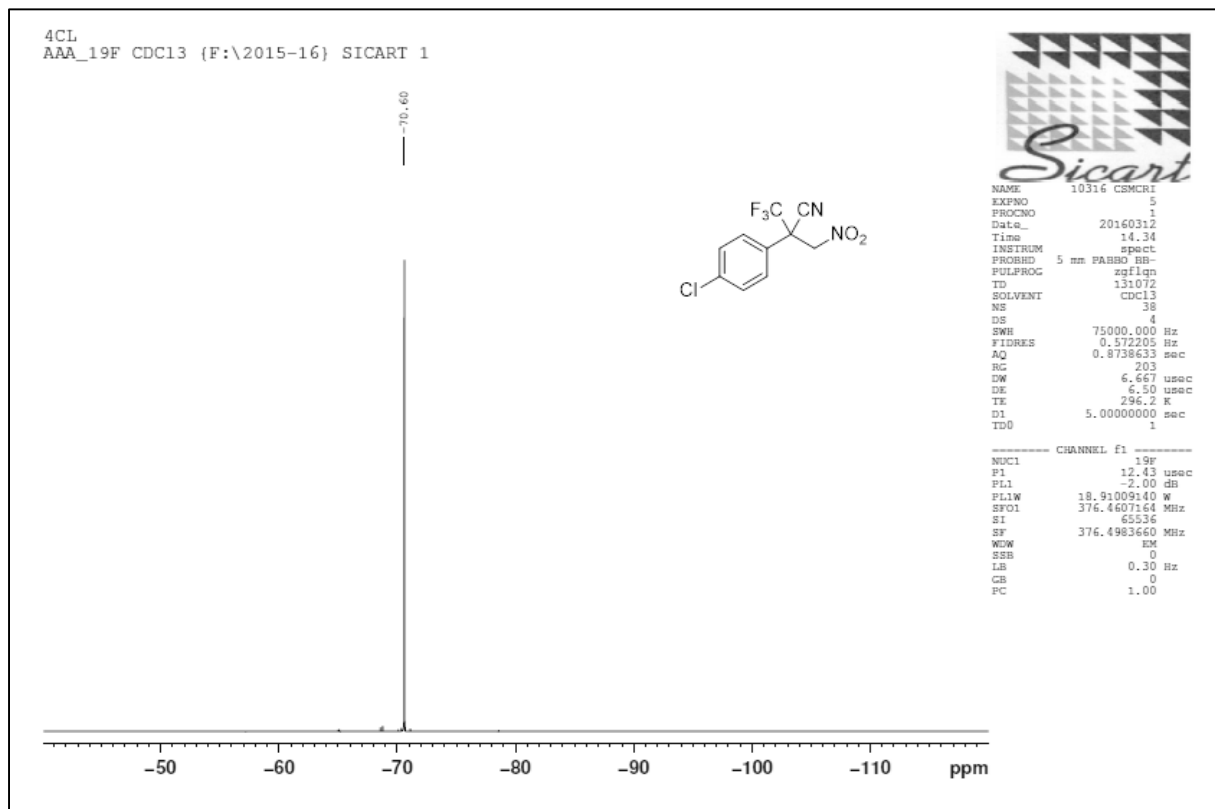



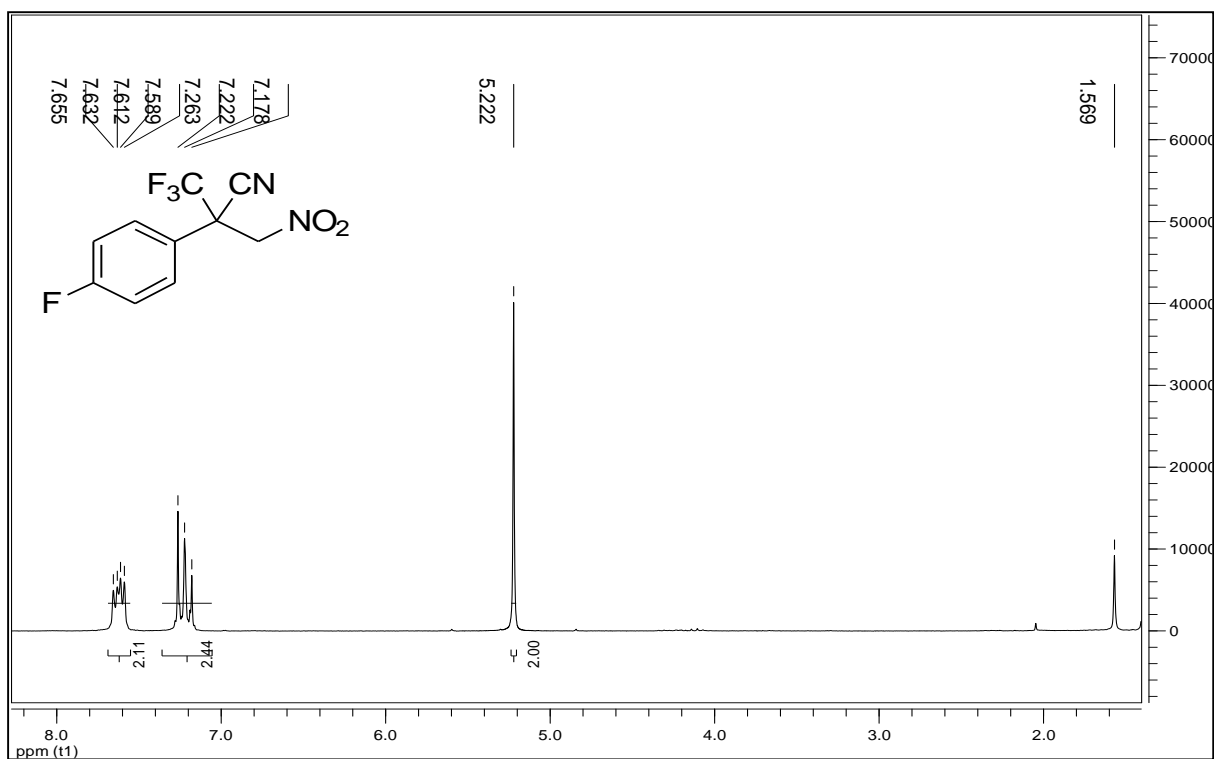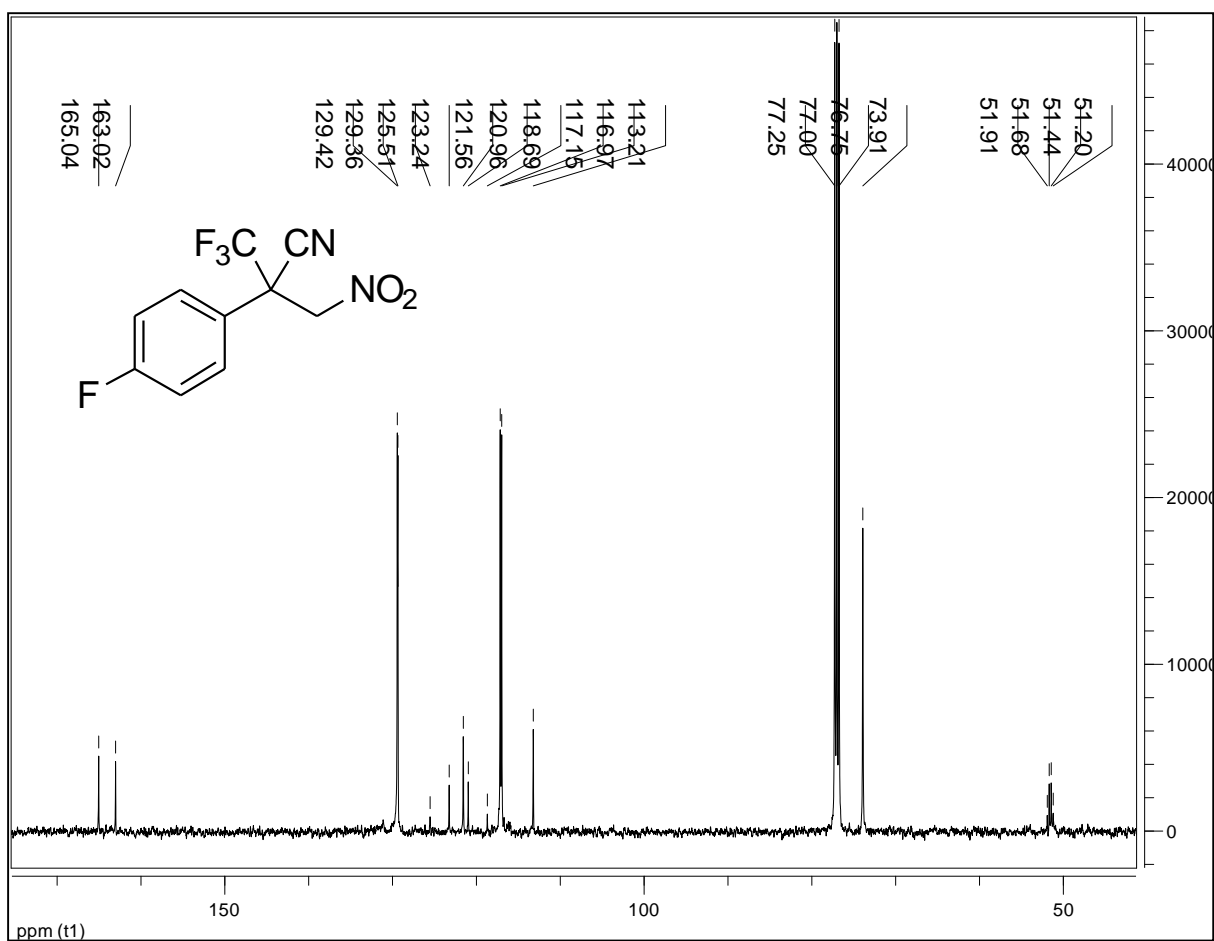

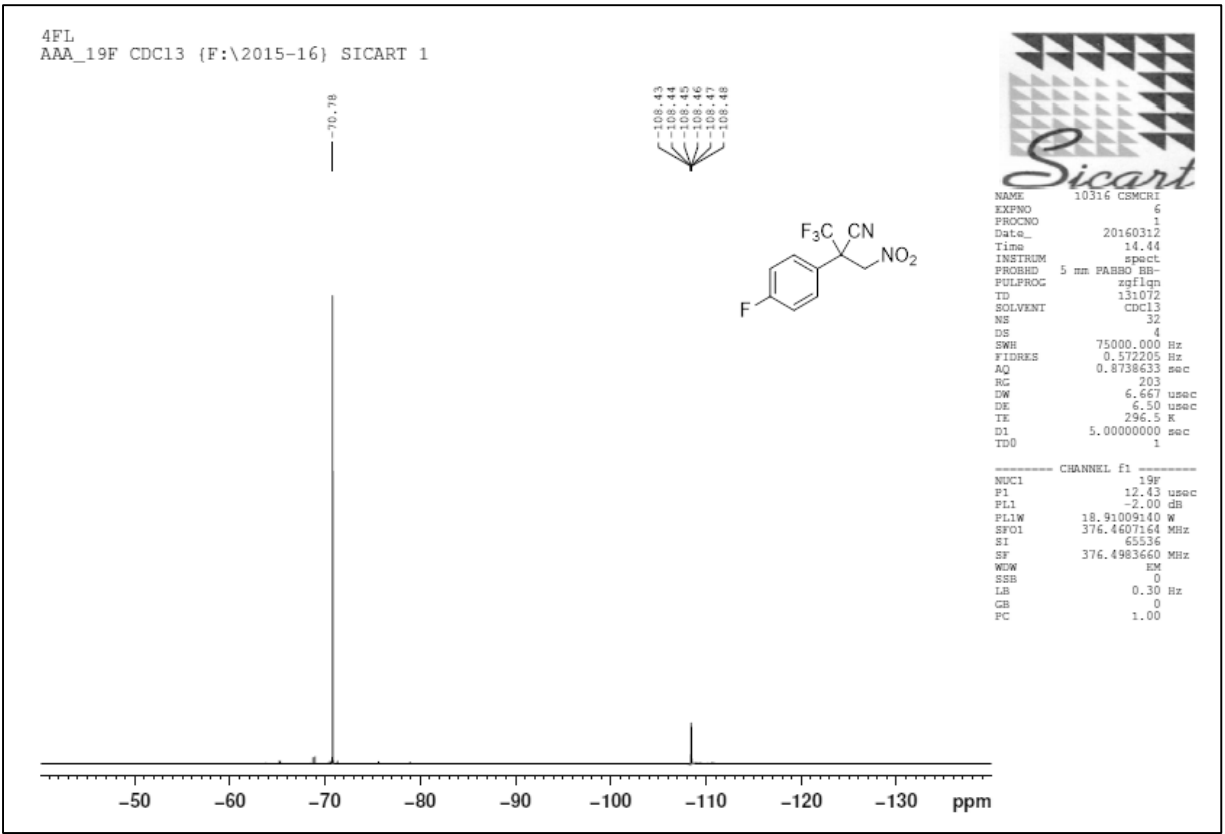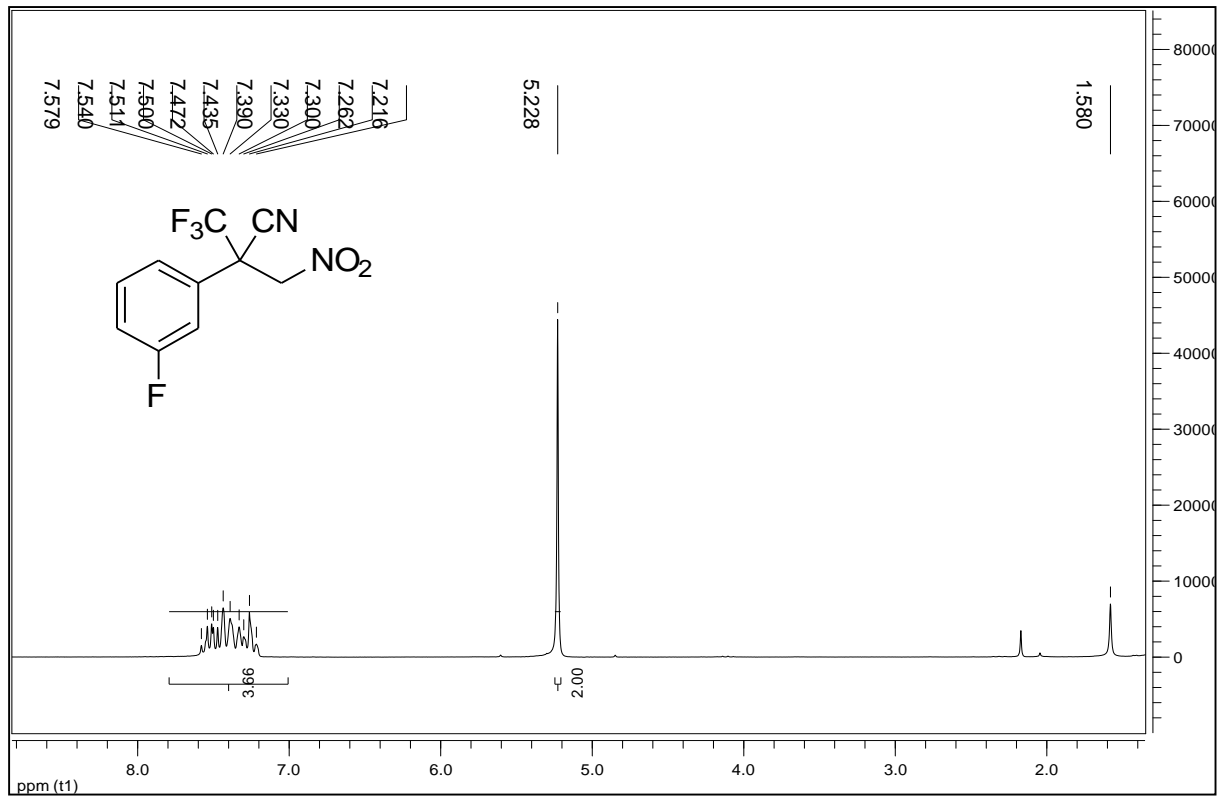

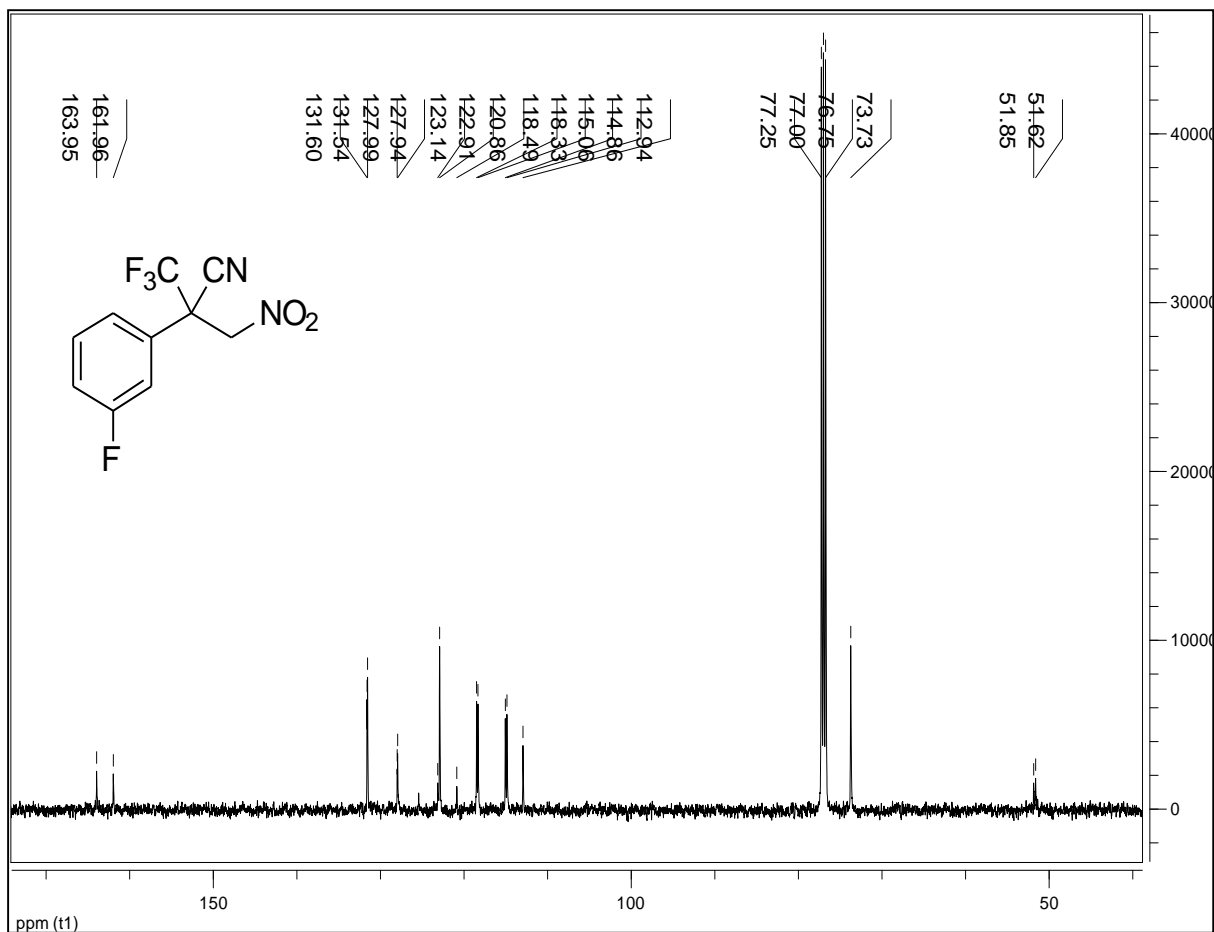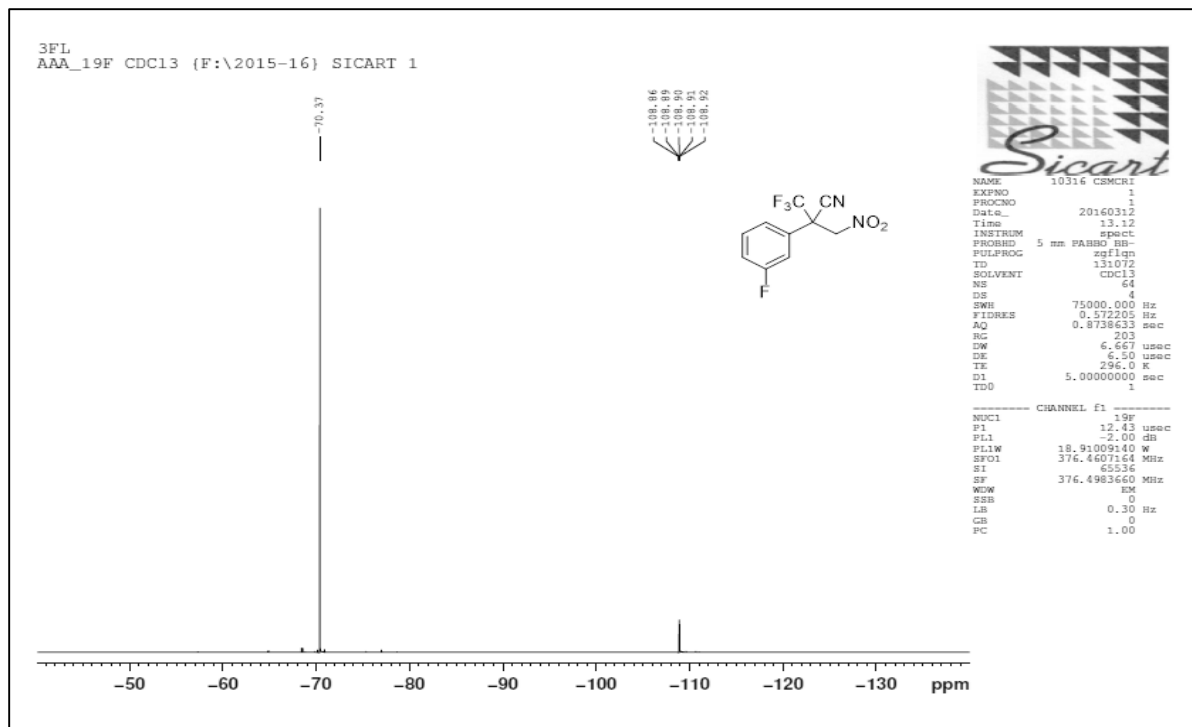

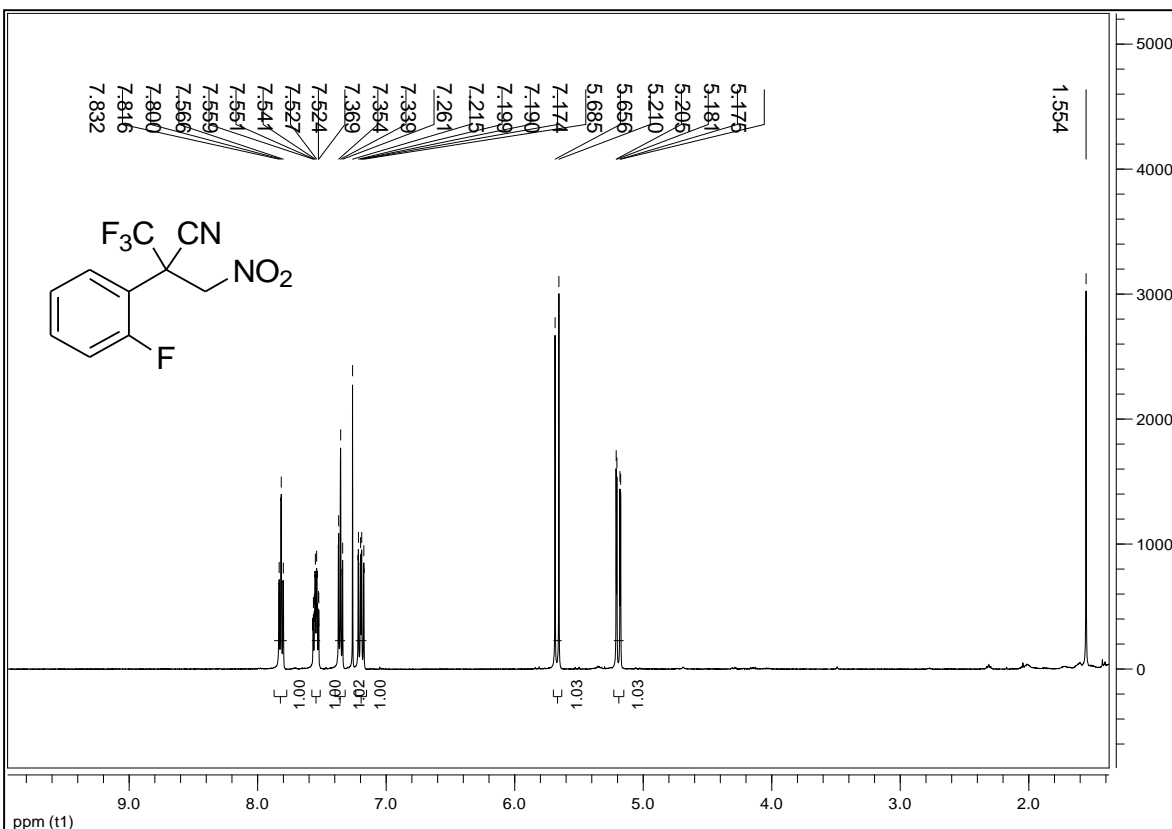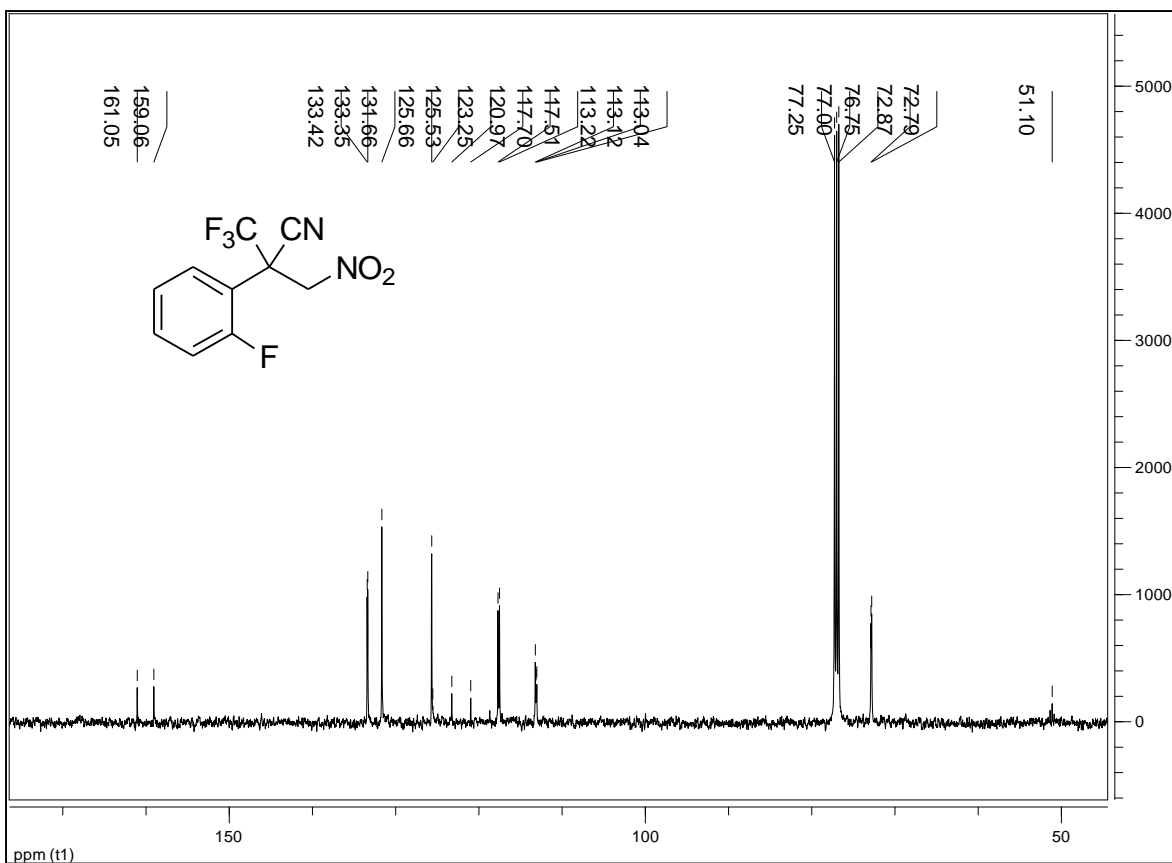

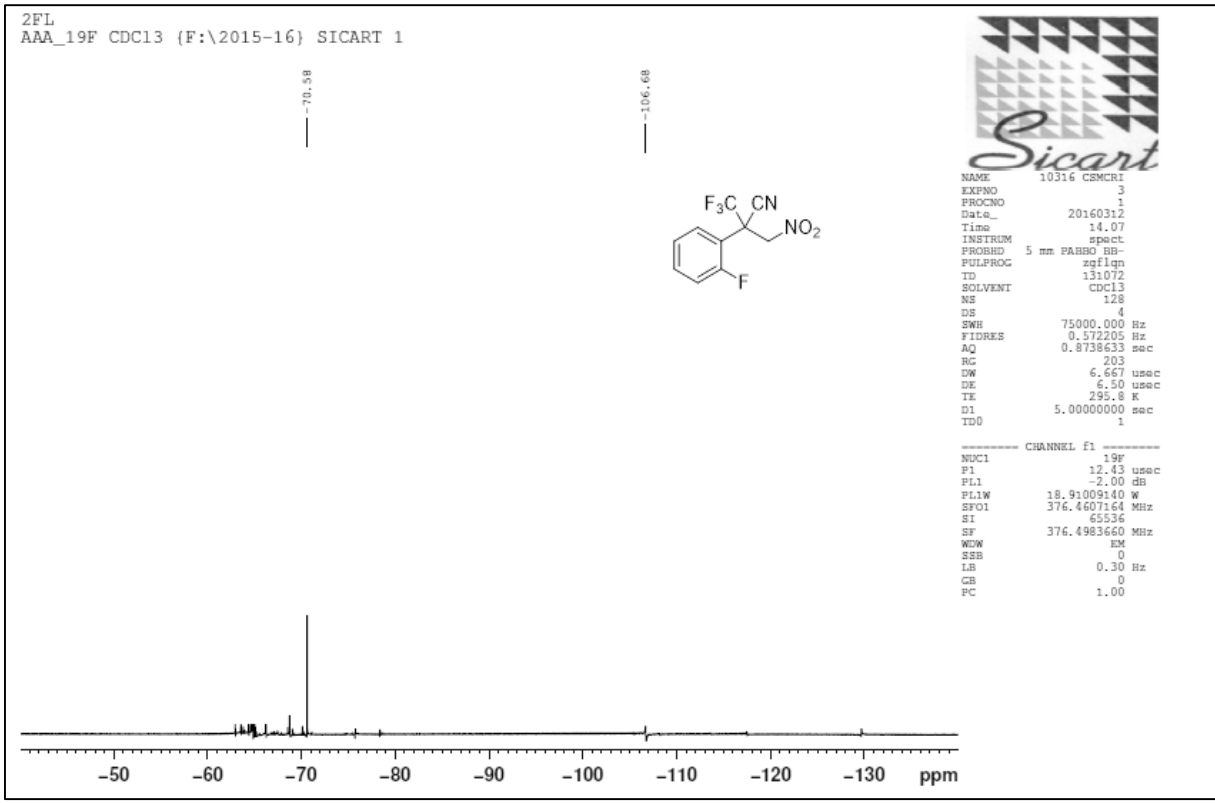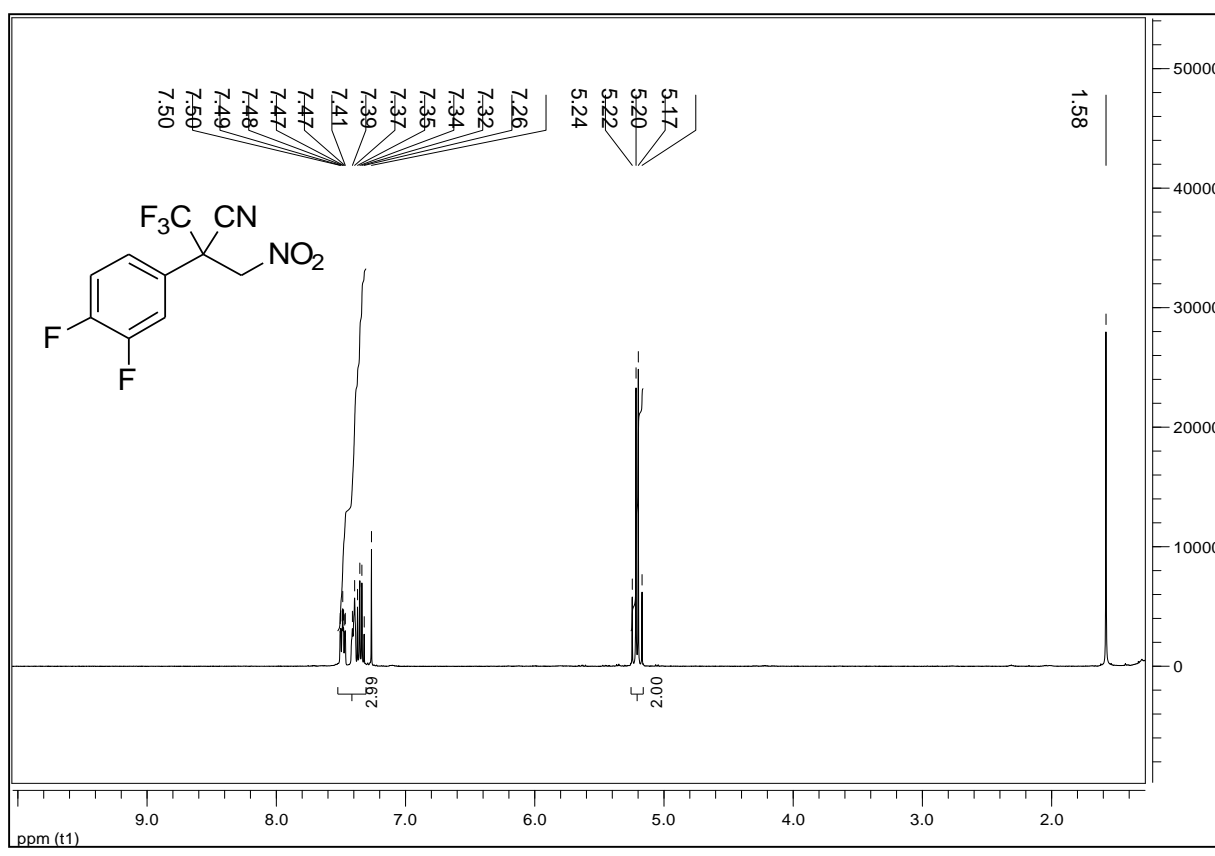

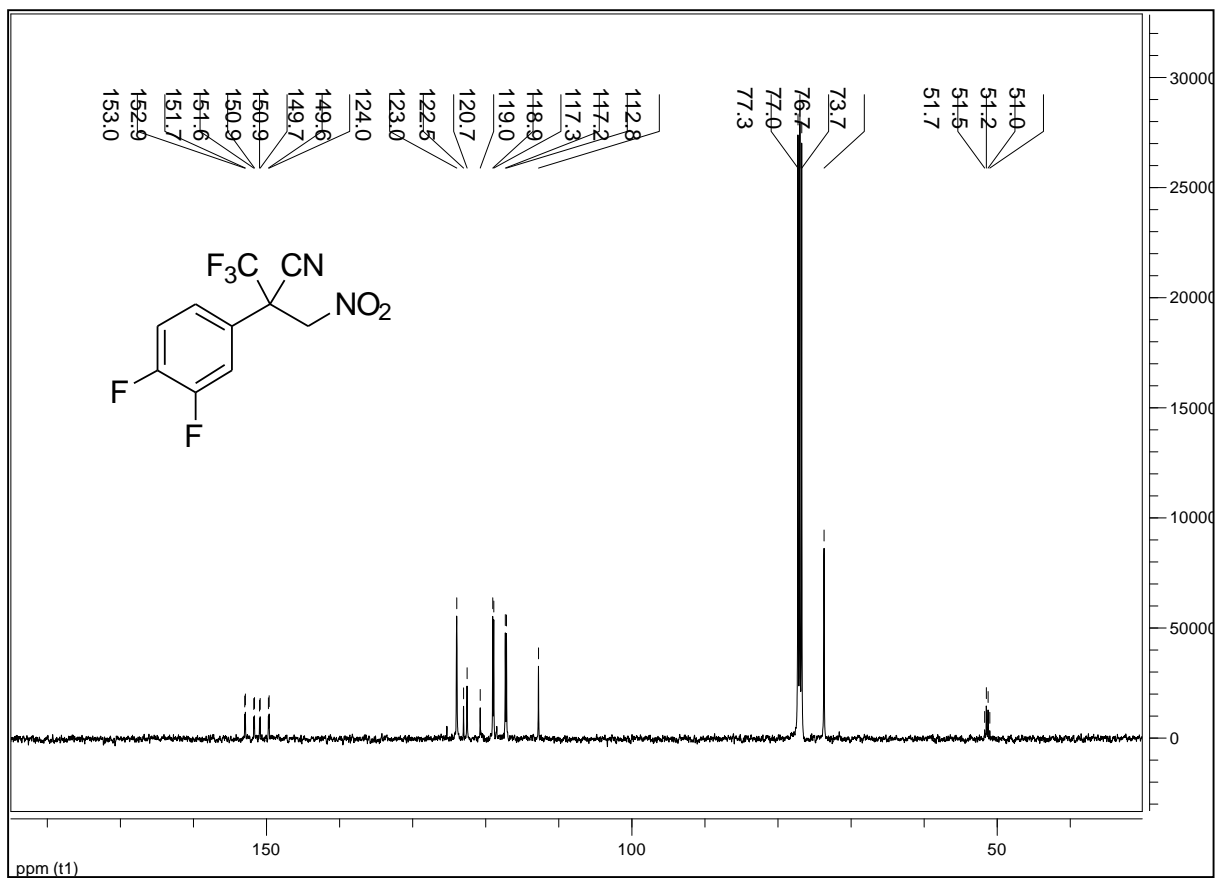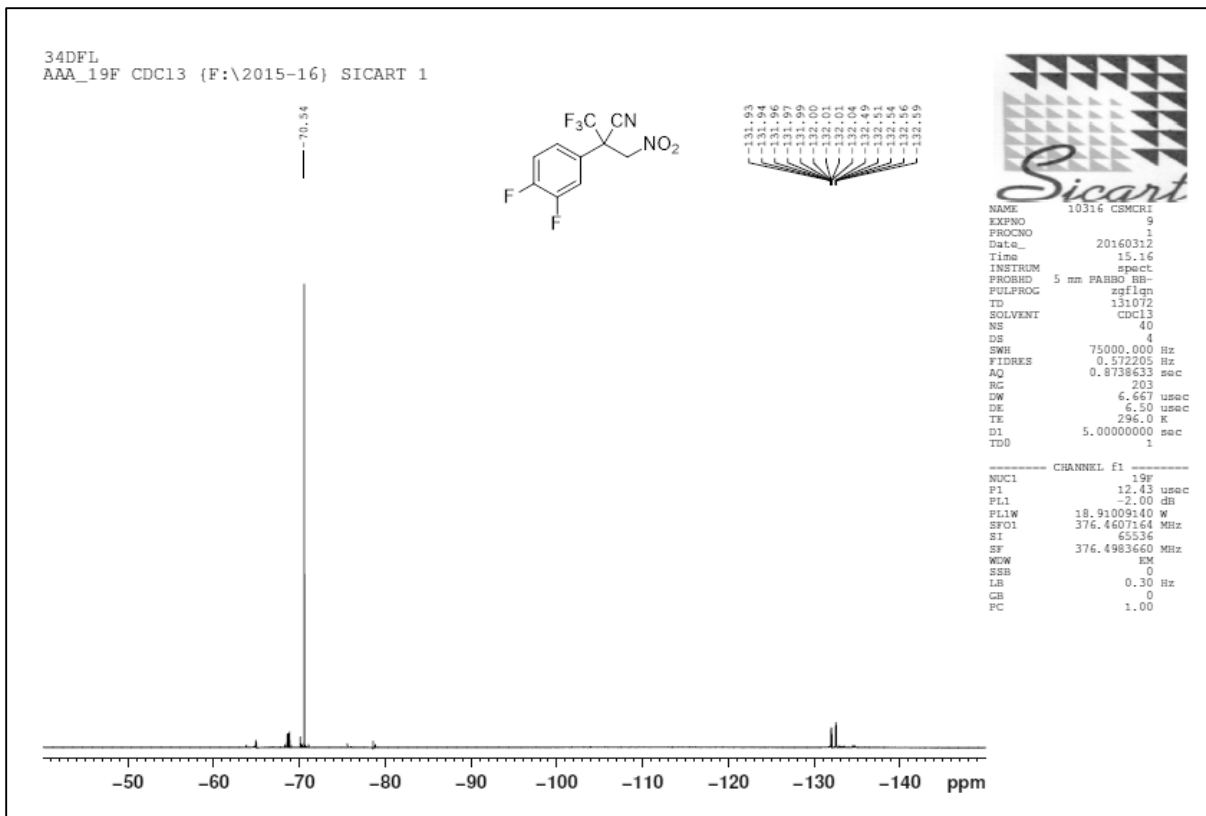

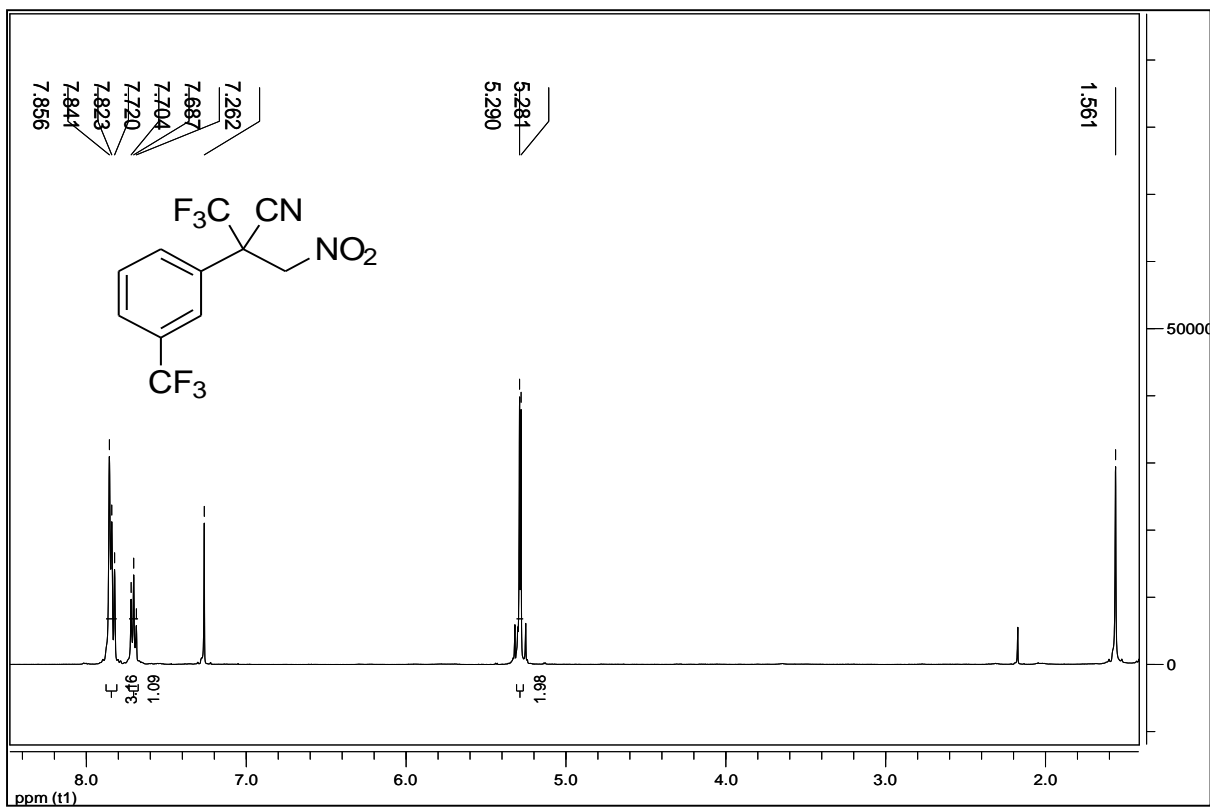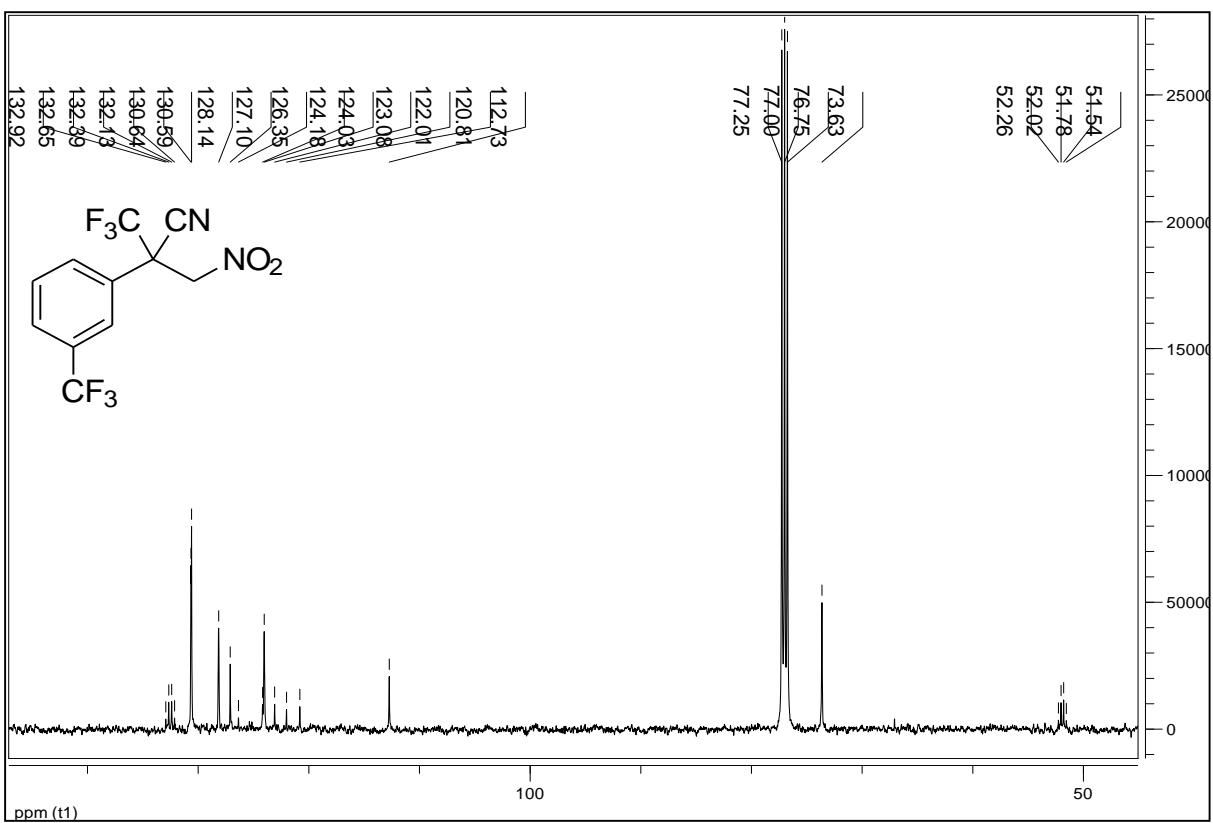

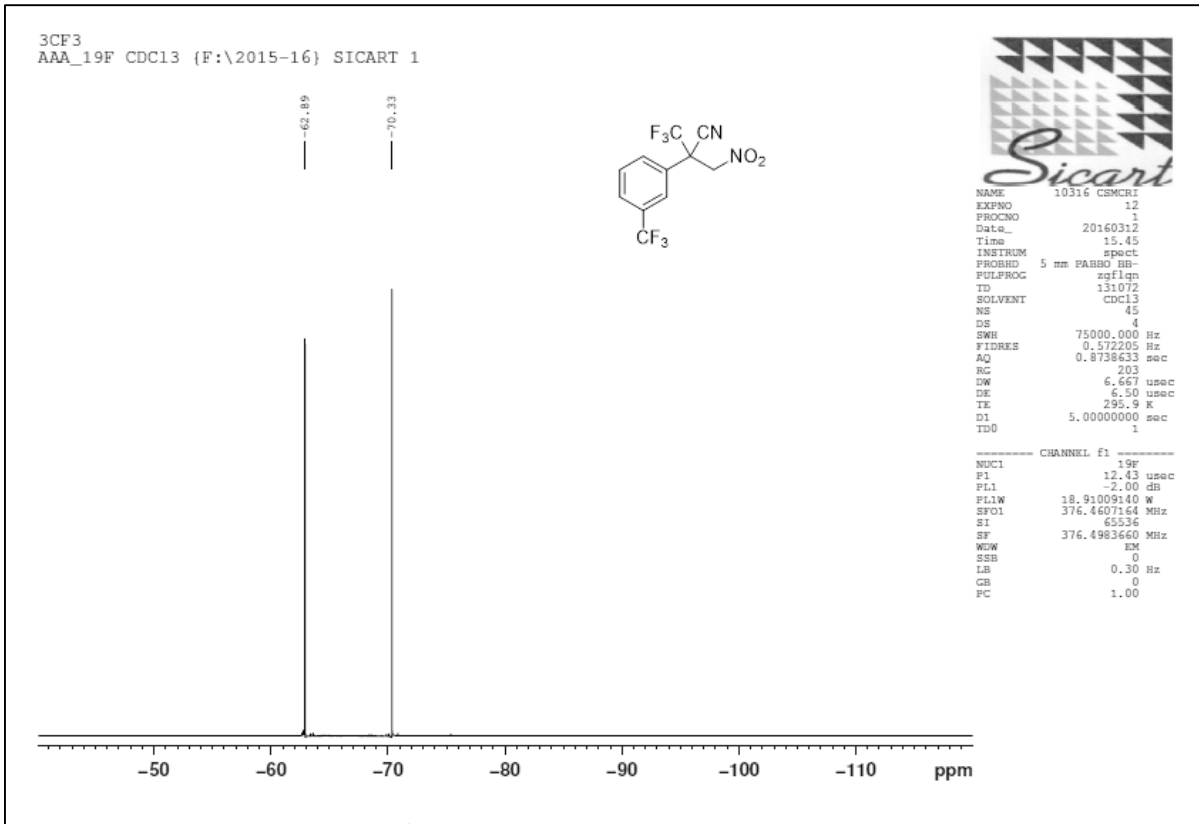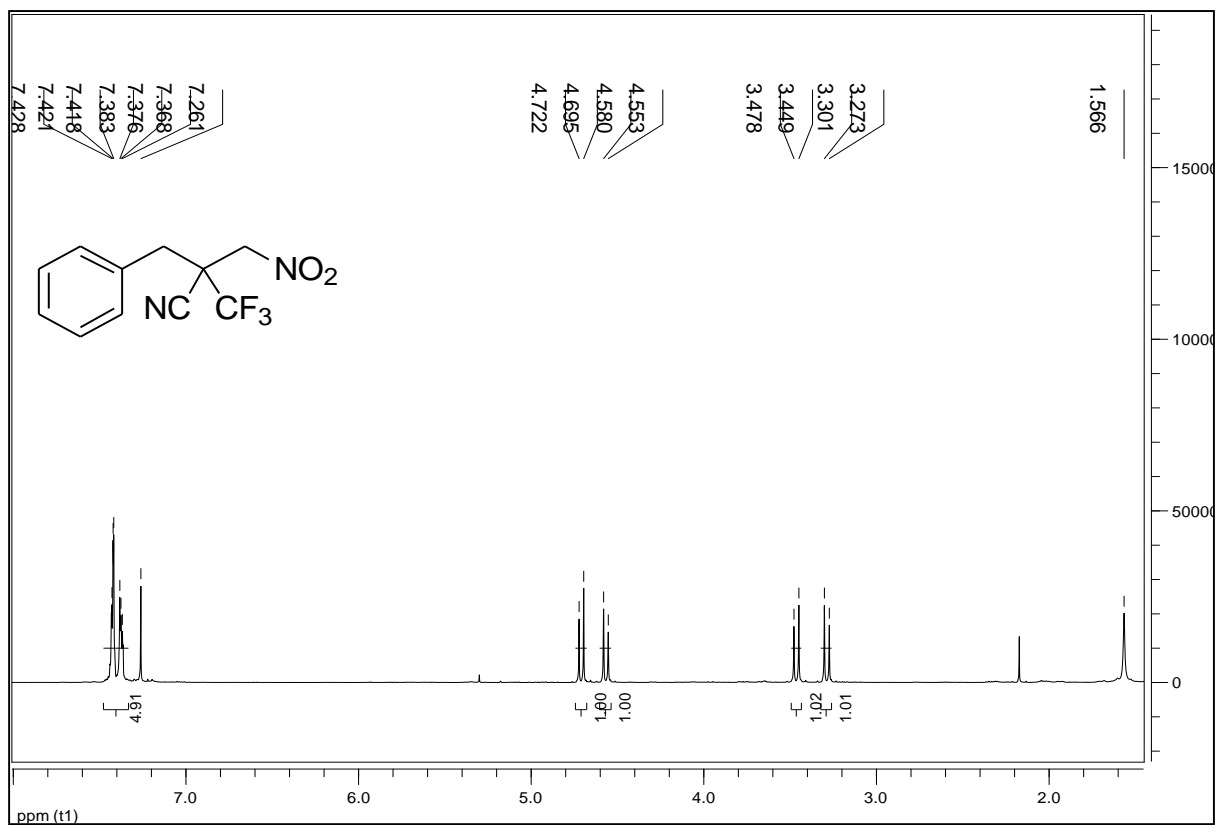



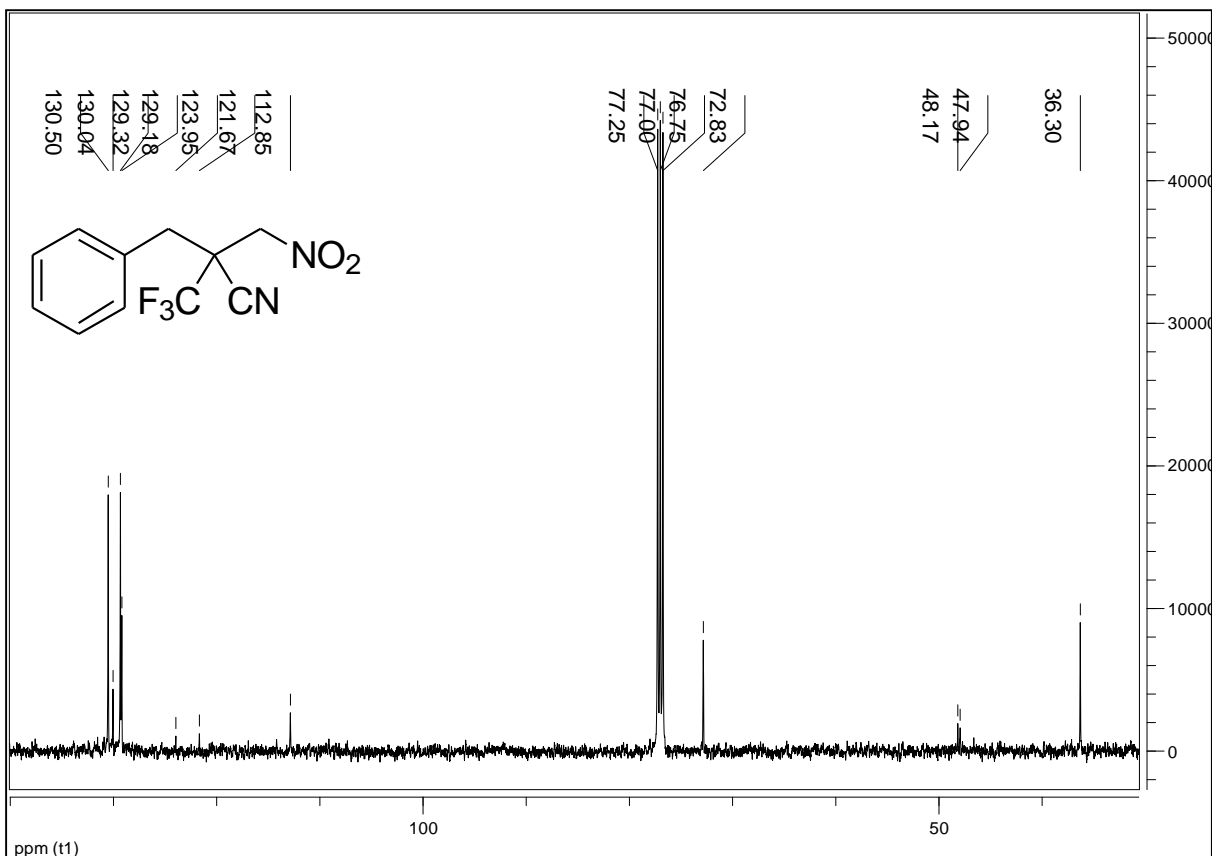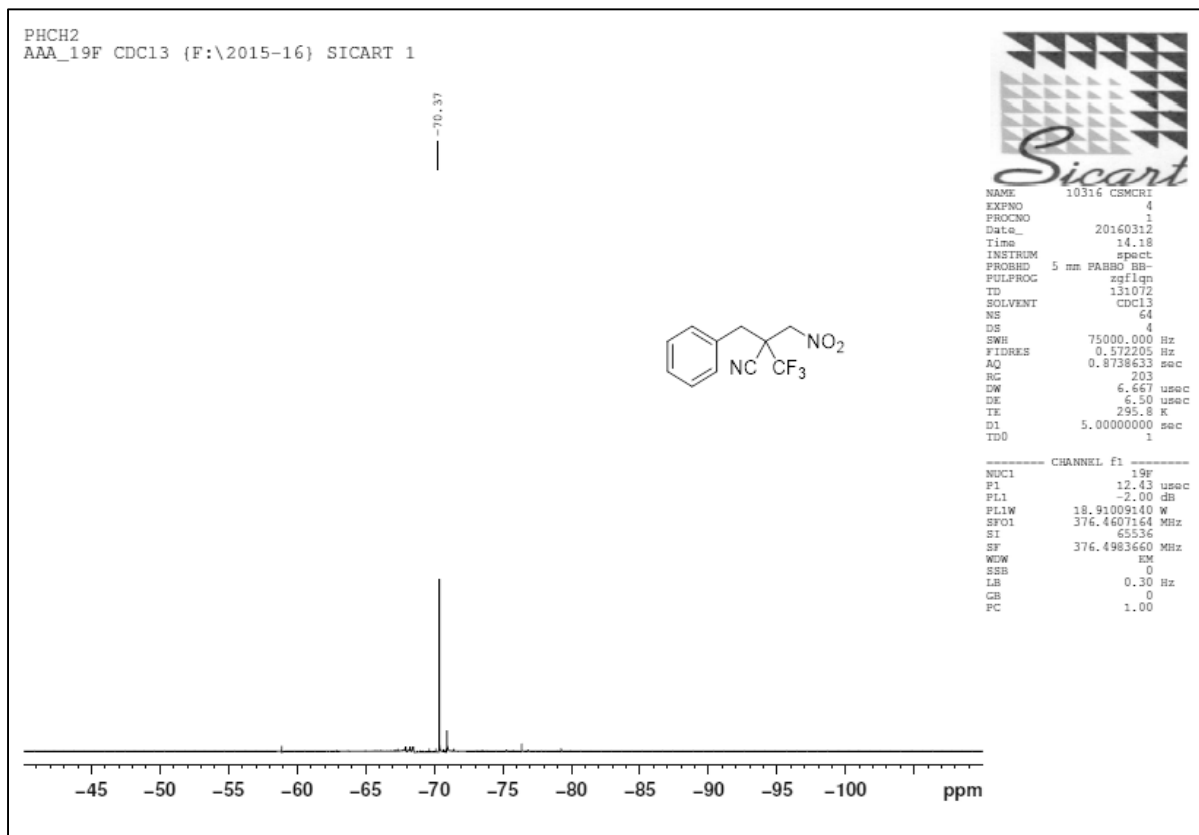

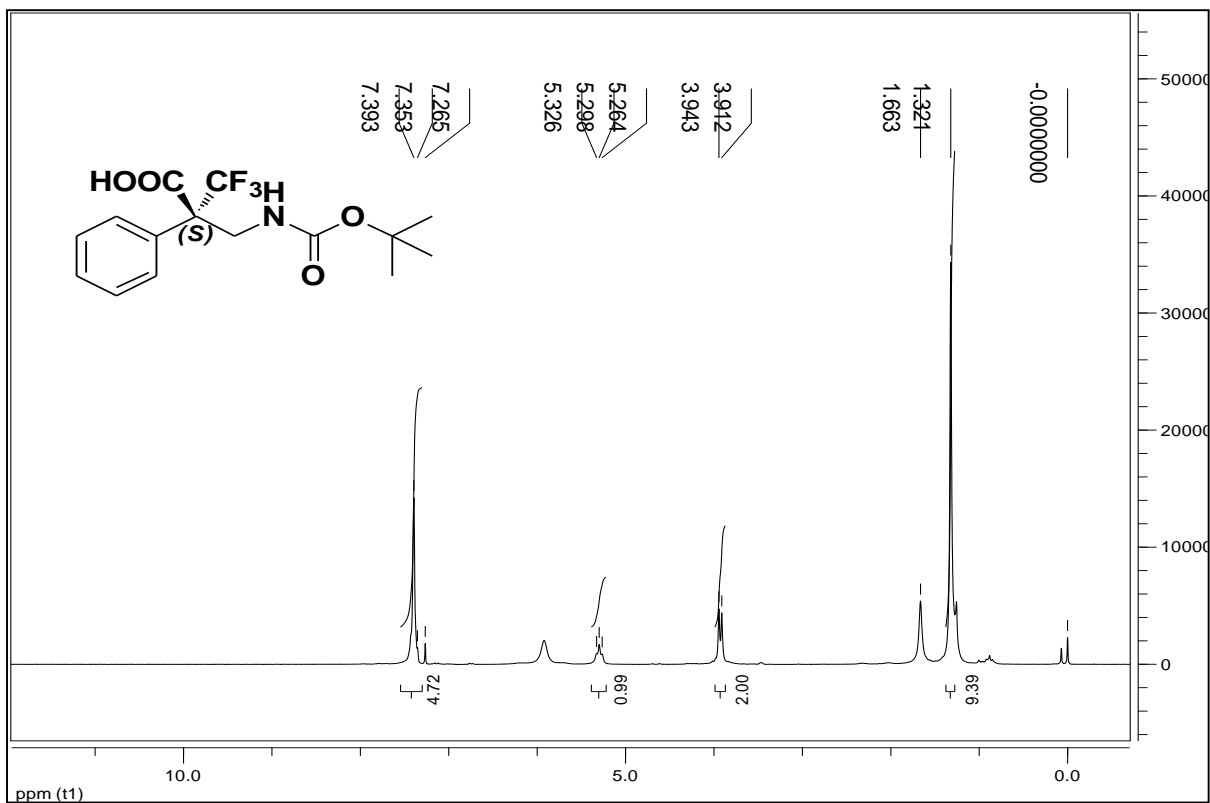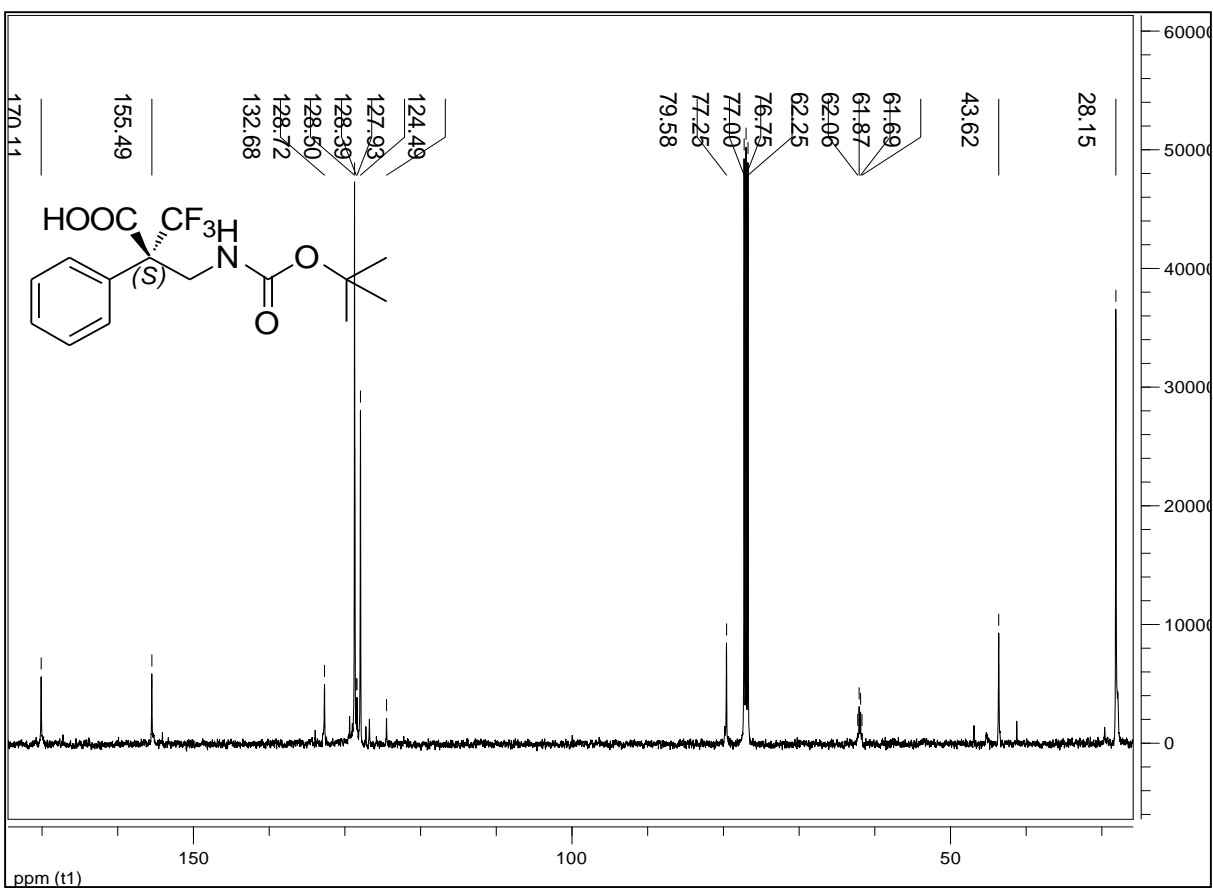

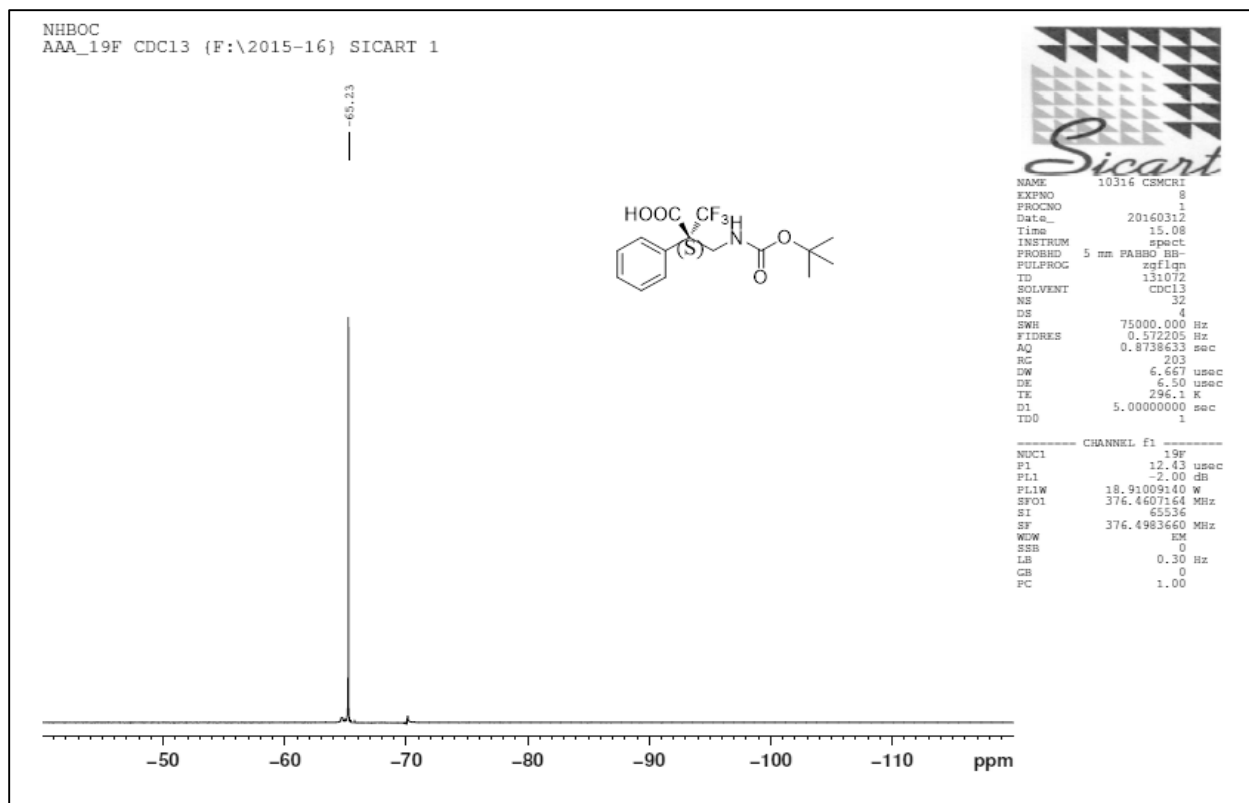

## 5. Copy of HRMS for product

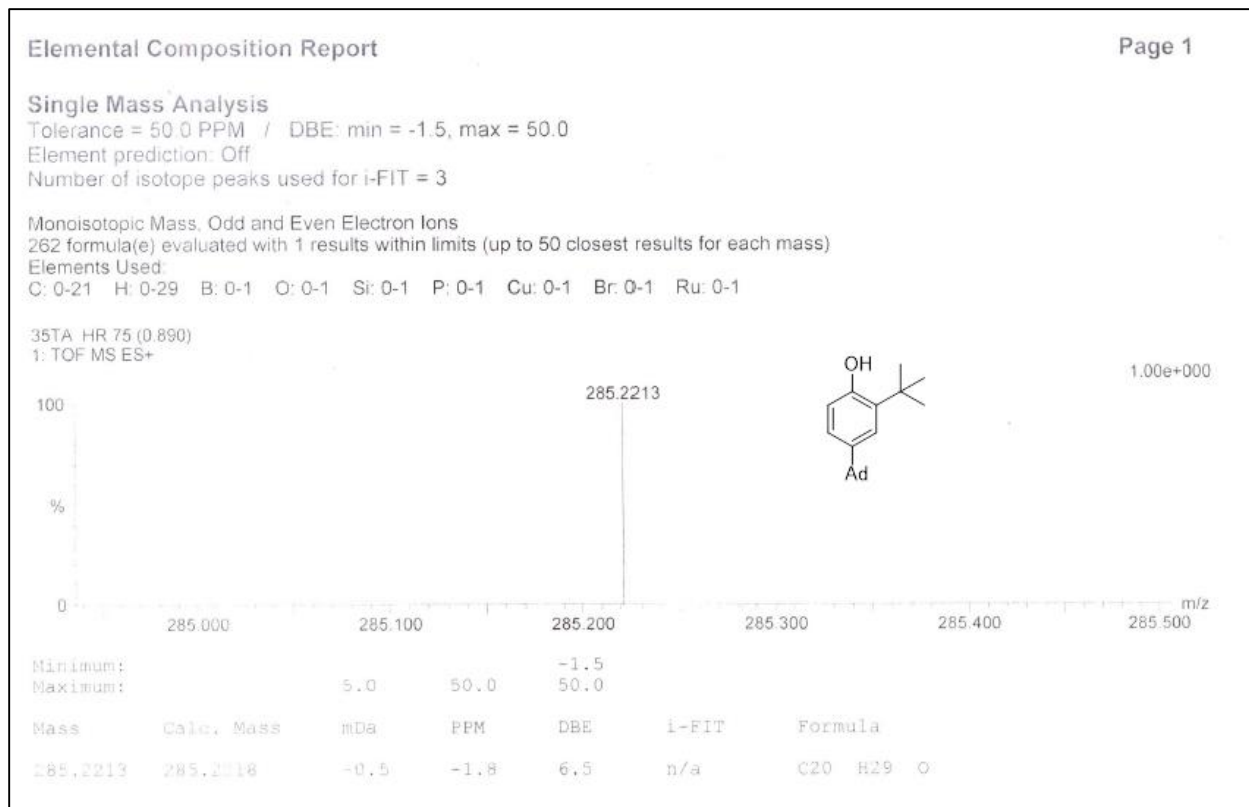

Elemental Composition Report

Single Mass Analysis

Tolerance = 50.0 PPM / DBE: min = -1.5, max = 50.0  
 Element prediction: Off  
 Number of isotope peaks used for i-FIT = 3

Monoisotopic Mass, Odd and Even Electron Ions

412 formula(e) evaluated with 1 results within limits (up to 50 closest results for each mass)

Elements Used:

C: 0-22 H: 0-29 B: 0-1 O: 0-2 Si: 0-1 P: 0-1 Cu: 0-1 Br: 0-1 Ru: 0-1

5AS HR 42 (0.499)  
 1: TOF MS ES+

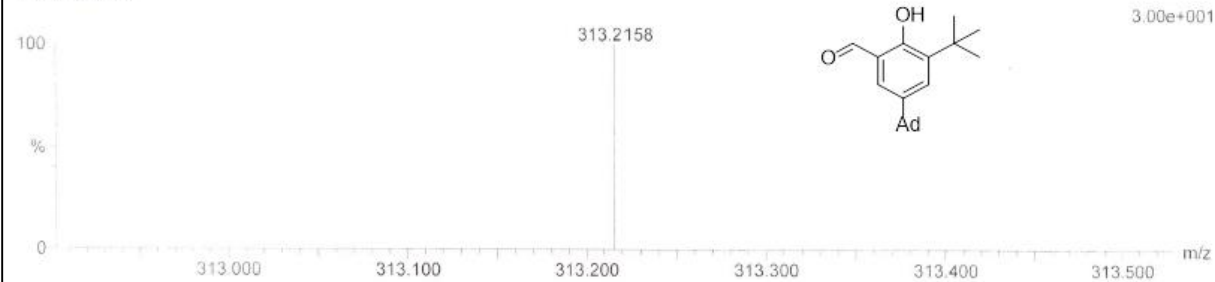

| Minimum: |            |      |      | -1.5 |       |            |
|----------|------------|------|------|------|-------|------------|
| Maximum: | 5.0        | 50.0 | 50.0 | 50.0 |       |            |
| Mass     | Calc. Mass | mDa  | PPM  | DBE  | i-FIT | Formula    |
| 313.2158 | 313.2168   | -1.0 | -3.2 | 7.5  | n/a   | C21 H29 O2 |

Elemental Composition Report

Single Mass Analysis

Tolerance = 50.0 PPM / DBE: min = -1.5, max = 50.0  
 Element prediction: Off  
 Number of isotope peaks used for i-FIT = 3

Monoisotopic Mass, Odd and Even Electron Ions

3 formula(e) evaluated with 1 results within limits (up to 50 closest results for each mass)

Elements Used:

C: 0-49 H: 0-67 N: 0-2 O: 0-2

N2 1 HR 57 (0.677)

1: TOF MS ES+

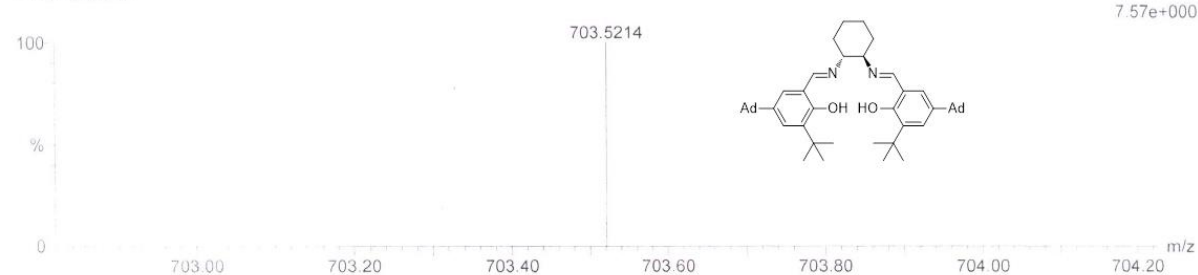

| Minimum: |            |      |      | -1.5 |       |               |
|----------|------------|------|------|------|-------|---------------|
| Maximum: | 5.0        | 50.0 | 50.0 | 50.0 |       |               |
| Mass     | Calc. Mass | mDa  | PPM  | DBE  | i-FIT | Formula       |
| 703.5214 | 703.5203   | 1.1  | 1.6  | 16.5 | n/a   | C48 H67 N2 O2 |

### Elemental Composition Report

Page 1

#### Single Mass Analysis

Tolerance = 50.0 PPM / DBE: min = -1.5, max = 50.0

Element prediction: Off

Number of isotope peaks used for i-FIT = 3

Monoisotopic Mass, Even Electron Ions

27 formula(e) evaluated with 1 results within limits (up to 50 closest results for each mass)

Elements Used:

C: 0-11 H: 0-8 N: 0-2 O: 0-2 F: 0-3

PCN HR 10 (0.139)

1: TOF MS ES+

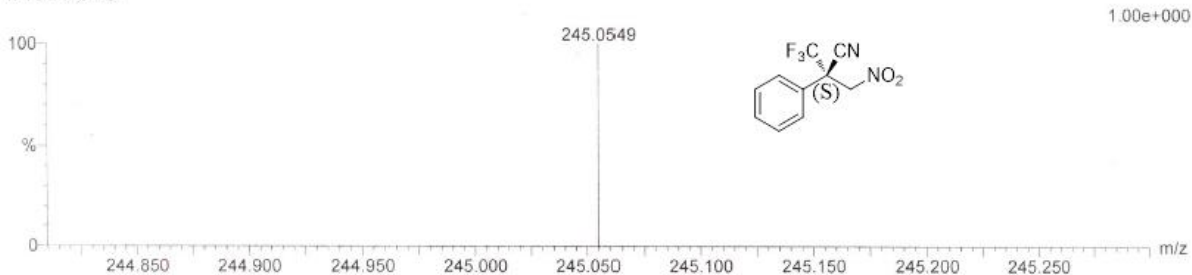

Minimum: -1.5  
Maximum: 50.0 50.0 50.0

| Mass     | Calc. Mass | mDa | PPM | DBE | i-FIT | Formula         |
|----------|------------|-----|-----|-----|-------|-----------------|
| 245.0549 | 245.0538   | 1.1 | 4.5 | 6.5 | n/a   | C10 H8 N2 O2 F3 |

### Elemental Composition Report

Page 1

#### Single Mass Analysis

Tolerance = 50.0 PPM / DBE: min = -1.5, max = 50.0

Element prediction: Off

Number of isotope peaks used for i-FIT = 3

Monoisotopic Mass, Even Electron Ions

27 formula(e) evaluated with 1 results within limits (up to 50 closest results for each mass)

Elements Used:

C: 0-12 H: 0-10 N: 0-2 O: 0-2 F: 0-3

MEC HR 3 (0.042)

1: TOF MS ES+

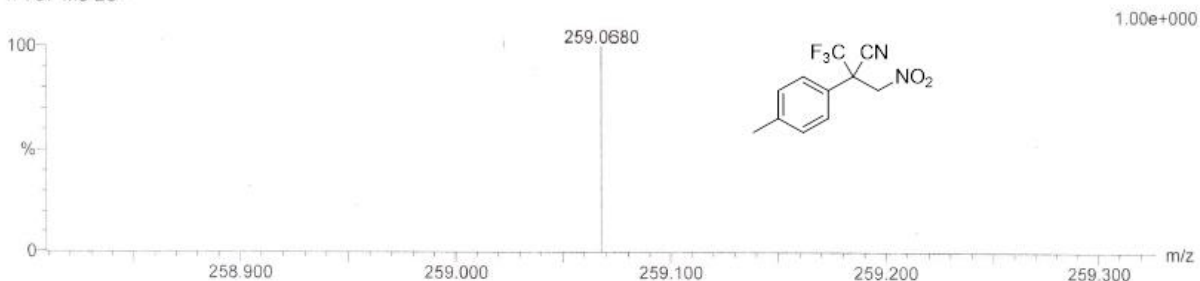

Minimum: -1.5  
Maximum: 5.0 50.0 50.0

| Mass     | Calc. Mass | mDa  | PPM  | DBE | i-FIT | Formula          |
|----------|------------|------|------|-----|-------|------------------|
| 259.0680 | 259.0694   | -1.4 | -5.4 | 6.5 | n/a   | C11 H10 N2 O2 F3 |

Elemental Composition Report

Single Mass Analysis

Tolerance = 50.0 PPM / DBE: min = -1.5, max = 50.0

Element prediction: Off

Number of isotope peaks used for i-FIT = 3

Monoisotopic Mass, Even Electron Ions

973 formula(e) evaluated with 4 results within limits (up to 50 closest results for each mass)

Elements Used:

C: 0-12 H: 0-10 B: 0-1 N: 0-2 O: 0-3 F: 0-3 Na: 0-1 Si: 0-1 V: 0-2

MEOCN 50 (0.594)

1: TOF MS ES+

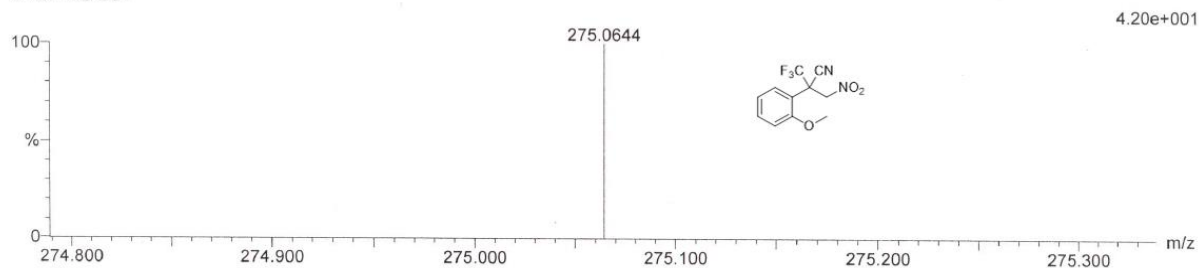

Minimum: -1.5  
Maximum: 5.0 50.0 50.0

| Mass     | Calc. Mass | mDa | PPM  | DBE | i-FIT | Formula              |
|----------|------------|-----|------|-----|-------|----------------------|
| 275.0644 | 275.0644   | 0.0 | 0.0  | 6.5 | n/a   | C11 H10 N2 O3 F3     |
|          | 275.0624   | 2.0 | 7.3  | 9.5 | n/a   | C12 H10 B N2 O F2 Si |
|          | 275.0608   | 3.6 | 13.1 | 7.5 | n/a   | C12 H10 N2 O2 F2 Na  |
|          | 275.0579   | 6.5 | 23.6 | 7.5 | n/a   | C11 H8 B N2 O F3 Na  |

Elemental Composition Report

Single Mass Analysis

Tolerance = 50.0 PPM / DBE: min = -1.5, max = 50.0

Element prediction: Off

Number of isotope peaks used for i-FIT = 3

Monoisotopic Mass, Even Electron Ions

80 formula(e) evaluated with 1 results within limits (up to 50 closest results for each mass)

Elements Used:

C: 0-12 H: 0-10 N: 0-2 O: 0-3 F: 0-3 Br: 0-1

4MEO HR 6 (0.083)

1: TOF MS ES+

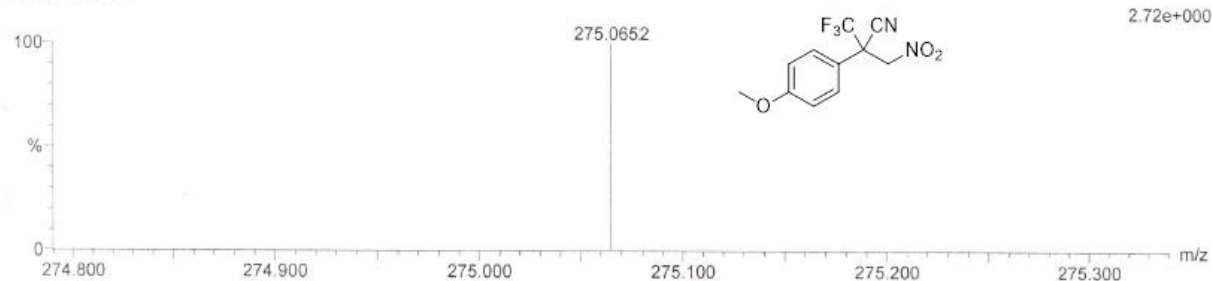

Minimum: -1.5  
Maximum: 5.0 50.0 50.0

| Mass     | Calc. Mass | mDa | PPM | DBE | i-FIT | Formula          |
|----------|------------|-----|-----|-----|-------|------------------|
| 275.0652 | 275.0644   | 0.8 | 2.9 | 6.5 | n/a   | C11 H10 N2 O3 F3 |

Elemental Composition Report

Single Mass Analysis

Tolerance = 50.0 PPM / DBE: min = -1.5, max = 50.0

Element prediction: Off

Number of isotope peaks used for i-FIT = 3

Monoisotopic Mass, Odd and Even Electron Ions

2352 formula(e) evaluated with 8 results within limits (up to 50 closest results for each mass)

Elements Used:

C: 0-11 H: 0-7 B: 0-1 N: 0-2 O: 0-2 F: 0-3 Si: 0-1 P: 0-1 Cl: 0-1 Cu: 0-1 Br: 0-1 Ru: 0-1

4CL HR1 20 (0.237)

1: TOF MS ES+

3.13e+001

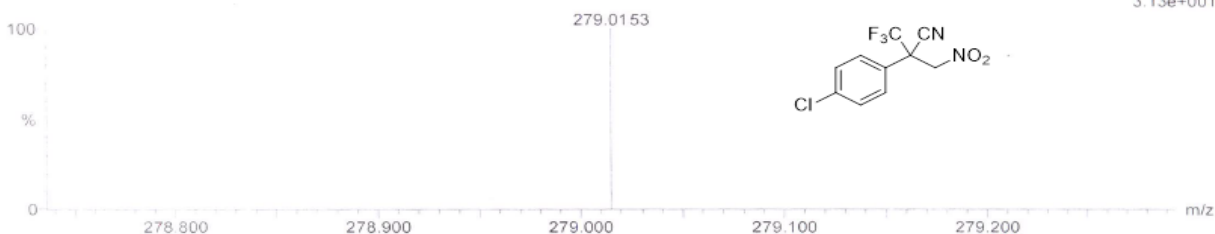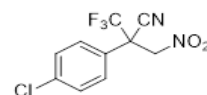

Minimum:  
Maximum:

| Mass     | Calc. Mass | mDa  | PPM  | DBE  | i-FIT | Formula                |
|----------|------------|------|------|------|-------|------------------------|
| 279.0153 | 279.0148   | 0.5  | 1.8  | 6.5  | n/a   | C10 H7 N2 O2 F3 Cl     |
|          | 279.0135   | 1.8  | 6.5  | 10.0 | n/a   | C11 H5 B N O2 F3 Si    |
|          | 279.0128   | 2.5  | 9.0  | 9.5  | n/a   | C11 H7 B N2 O F2 Si Cl |
|          | 279.0126   | 2.7  | 9.7  | 9.5  | n/a   | C10 H7 B N2 O F2 Si P  |
|          | 279.0106   | 4.7  | 16.8 | 10.5 | n/a   | C11 H4 B N2 O F3 P     |
|          | 279.0062   | 9.1  | 32.6 | 9.5  | n/a   | C11 H7 B N2 O F P Cl   |
|          | 279.0052   | 10.1 | 36.2 | 10.0 | n/a   | C11 H6 B N F3 Si P     |
|          | 279.0019   | 13.9 | 49.8 | 9.5  | n/a   | C11 H7 B O2 F2 Si P    |

Elemental Composition Report

Single Mass Analysis

Tolerance = 50.0 PPM / DBE: min = -1.5, max = 50.0

Element prediction: Off

Number of isotope peaks used for i-FIT = 3

Monoisotopic Mass, Even Electron Ions

66 formula(e) evaluated with 1 results within limits (up to 50 closest results for each mass)

Elements Used:

C: 0-11 H: 0-7 N: 0-2 O: 0-2 F: 0-4 Br: 0-1

4FCN HR 6 (0.083)

1: TOF MS ES+

1.00e+000

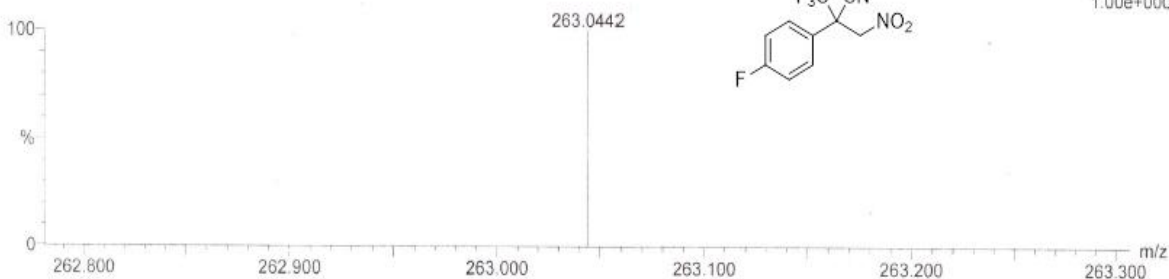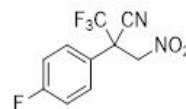

Minimum:  
Maximum:

| Mass     | Calc. Mass | mDa  | PPM  | DBE | i-FIT | Formula         |
|----------|------------|------|------|-----|-------|-----------------|
| 263.0442 | 263.0444   | -0.2 | -0.8 | 6.5 | n/a   | C10 H7 N2 O2 F4 |

Elemental Composition Report

Single Mass Analysis

Tolerance = 50.0 PPM / DBE: min = -1.5, max = 50.0

Element prediction: Off

Number of isotope peaks used for i-FIT = 3

Monoisotopic Mass, Even Electron Ions

1396 formula(e) evaluated with 3 results within limits (up to 50 closest results for each mass)

Elements Used:

C: 0-11 H: 0-7 B: 0-1 N: 0-2 O: 0-2 F: 0-4 Si: 0-1 P: 0-1 Cu: 0-1 Br: 0-1 Ru: 0-1

3F HR 10 (0.119)

1: TOF MS ES-

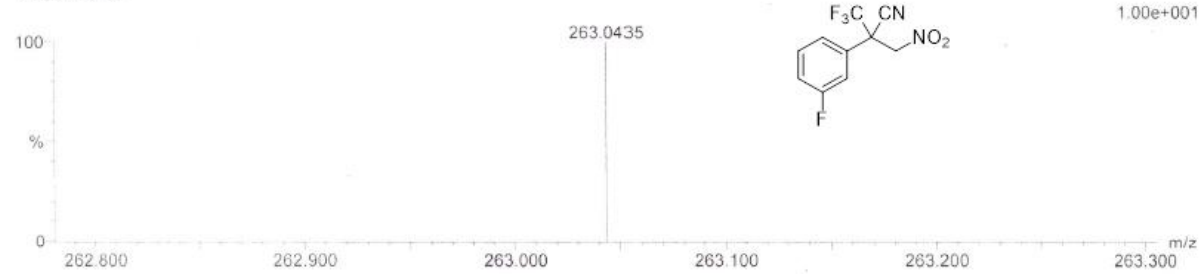

Minimum: -1.5  
Maximum: 5.0 50.0 50.0

| Mass     | Calc. Mass | mDa  | PPM  | DBE | i-FIT | Formula            |
|----------|------------|------|------|-----|-------|--------------------|
| 263.0435 | 263.0444 ✓ | -0.9 | -3.4 | 6.5 | n/a   | C10 H7 N2 O2 F4    |
|          | 263.0424   | 1.1  | 4.2  | 9.5 | n/a   | C11 H7 B N2 F3 Si  |
|          | 263.0357   | 7.8  | 29.7 | 9.5 | n/a   | C11 H7 B N2 O F2 P |

Elemental Composition Report

Single Mass Analysis

Tolerance = 50.0 PPM / DBE: min = -1.5, max = 50.0

Element prediction: Off

Number of isotope peaks used for i-FIT = 3

Monoisotopic Mass, Even Electron Ions

1417 formula(e) evaluated with 4 results within limits (up to 50 closest results for each mass)

Elements Used:

C: 0-11 H: 0-7 B: 0-1 N: 0-2 O: 0-2 F: 0-4 Na: 0-1 Si: 0-1 Cl: 0-1 V: 0-2

2FM 82 (0.973)

1: TOF MS ES+

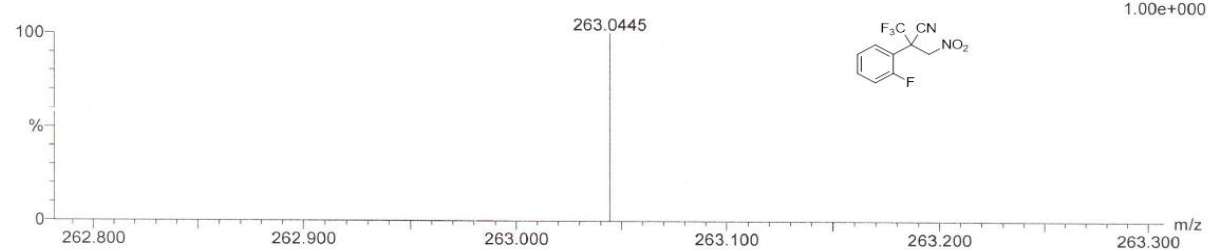

Minimum: -1.5  
Maximum: 5.0 50.0 50.0

| Mass     | Calc. Mass | mDa | PPM  | DBE | i-FIT | Formula           |
|----------|------------|-----|------|-----|-------|-------------------|
| 263.0445 | 263.0444   | 0.1 | 0.4  | 6.5 | n/a   | C10 H7 N2 O2 F4   |
|          | 263.0424   | 2.1 | 8.0  | 9.5 | n/a   | C11 H7 B N2 F3 Si |
|          | 263.0408   | 3.7 | 14.1 | 7.5 | n/a   | C11 H7 N2 O F3 Na |
|          | 263.0380   | 6.5 | 24.7 | 7.5 | n/a   | C10 H5 B N2 F4 Na |



Elemental Composition Report

Single Mass Analysis

Tolerance = 50.0 PPM / DBE: min = -1.5, max = 50.0

Element prediction: Off

Number of isotope peaks used for i-FIT = 3

Monoisotopic Mass, Even Electron Ions

78 formula(e) evaluated with 1 results within limits (up to 50 closest results for each mass)

Elements Used:

C: 0-11 H: 0-6 N: 0-2 O: 0-2 F: 0-5 Br: 0-1

34FCN HR 4 (0.055)

1: TOF MS ES+

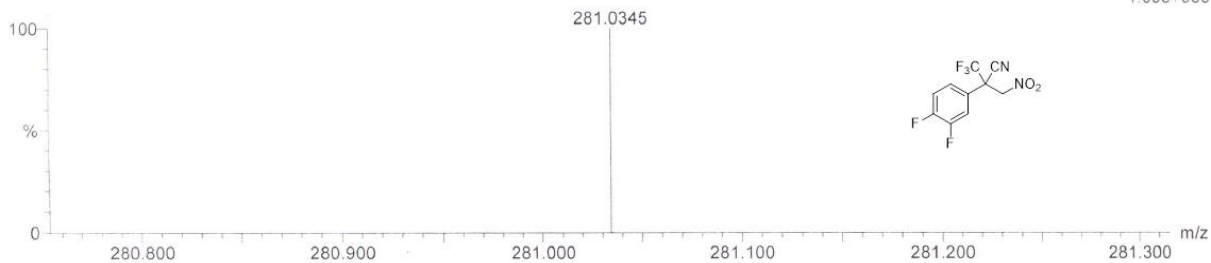

Minimum: -1.5  
Maximum: 5.0 50.0 50.0

| Mass     | Calc. Mass | mDa  | PPM  | DBE | i-FIT | Formula         |
|----------|------------|------|------|-----|-------|-----------------|
| 281.0345 | 281.0349   | -0.4 | -1.4 | 6.5 | n/a   | C10 H6 N2 O2 F5 |

Elemental Composition Report

Single Mass Analysis

Tolerance = 50.0 PPM / DBE: min = -1.5, max = 50.0

Element prediction: Off

Number of isotope peaks used for i-FIT = 3

Monoisotopic Mass, Even Electron Ions

98 formula(e) evaluated with 1 results within limits (up to 50 closest results for each mass)

Elements Used:

C: 0-12 H: 0-7 N: 0-2 O: 0-2 F: 0-6 Br: 0-1

C3 HR 10 (0.139)

1: TOF MS ES+

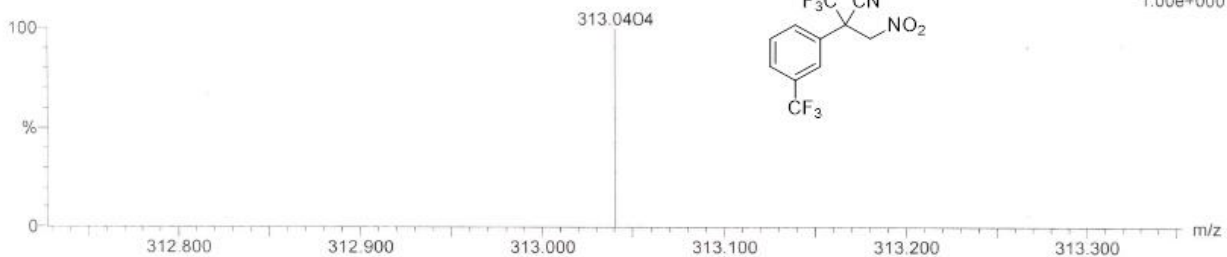

Minimum: -1.5  
Maximum: 5.0 50.0 50.0

| Mass     | Calc. Mass | mDa  | PPM  | DBE | i-FIT | Formula         |
|----------|------------|------|------|-----|-------|-----------------|
| 313.0404 | 313.0412   | -0.8 | -2.6 | 6.5 | n/a   | C11 H7 N2 O2 F6 |

## Elemental Composition Report

Page 1

### Single Mass Analysis

Tolerance = 50.0 PPM / DBE: min = -1.5, max = 50.0

Element prediction: Off

Number of isotope peaks used for i-FIT = 3

Monoisotopic Mass, Even Electron Ions

27 formula(e) evaluated with 1 results within limits (up to 50 closest results for each mass)

Elements Used:

C: 0-12 H: 0-10 N: 0-2 O: 0-2 F: 0-3

PHCH HR 74 (0.879)

1: TOF MS ES+

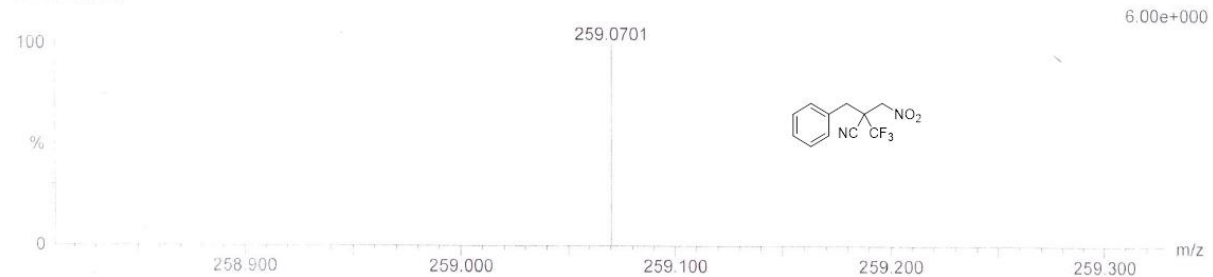

| Mass     | Calc. Mass | mDa | PPM | DBE | i-FIT | Formula          |
|----------|------------|-----|-----|-----|-------|------------------|
| 259.0701 | 259.0694   | 0.7 | 2.7 | 6.5 | n/a   | C11 H10 N2 O2 F3 |

## Elemental Composition Report

Page 1

### Single Mass Analysis

Tolerance = 50.0 PPM / DBE: min = -1.5, max = 50.0

Element prediction: Off

Number of isotope peaks used for i-FIT = 3

Monoisotopic Mass, Odd and Even Electron Ions

34 formula(e) evaluated with 1 results within limits (up to 50 closest results for each mass)

Elements Used:

C: 0-16 H: 0-19 N: 0-1 O: 0-4 F: 0-3

CHRL HR 78 (0.926)

1: TOF MS ES+

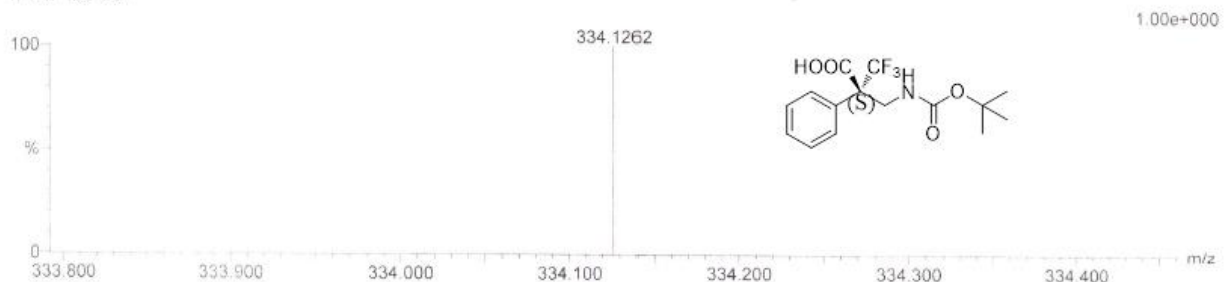

| Mass     | Calc. Mass | mDa  | PPM  | DBE | i-FIT | Formula         |
|----------|------------|------|------|-----|-------|-----------------|
| 334.1262 | 334.1266   | -0.4 | -1.2 | 5.5 | n/a   | C15 H19 N O4 F3 |

6. Crystal reports for product (2a):

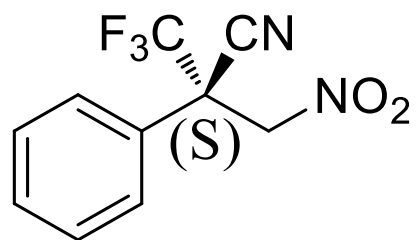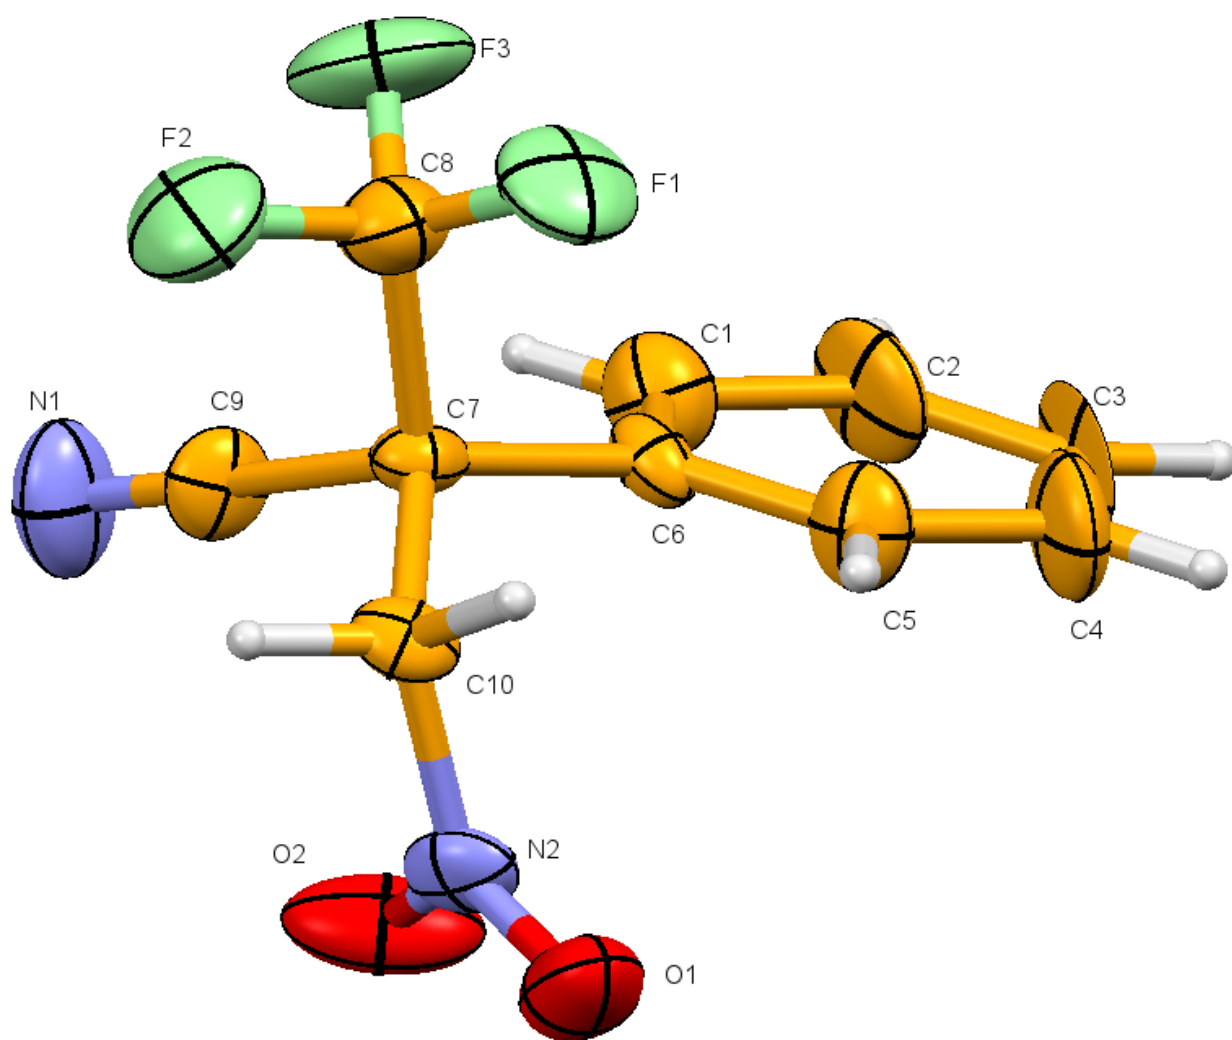

**Fig.** ORTEP diagram of the chiral organic compound with atom numbering scheme ( 40% probability factor for the thermal ellipsoids)

| Identification code                                                                                                          | AJT1M                                                                       |
|------------------------------------------------------------------------------------------------------------------------------|-----------------------------------------------------------------------------|
| Chemical formula                                                                                                             | C <sub>10</sub> H <sub>7</sub> F <sub>3</sub> N <sub>2</sub> O <sub>2</sub> |
| Formula weight                                                                                                               | 244.18                                                                      |
| Crystal Colour                                                                                                               | Colourless                                                                  |
| Crystal Size (mm)                                                                                                            | 0.23 x 0.11 x 0.04                                                          |
| Temperature (K)                                                                                                              | 293(2)                                                                      |
| Crystal System                                                                                                               | Monoclinic                                                                  |
| Space Group                                                                                                                  | P2 <sub>1</sub>                                                             |
| a(Å)                                                                                                                         | 8.085(5)                                                                    |
| b(Å)                                                                                                                         | 6.710(4)                                                                    |
| c(Å)                                                                                                                         | 10.341(6)                                                                   |
| α(°)                                                                                                                         | 90                                                                          |
| β(°)                                                                                                                         | 93.418(9)                                                                   |
| γ(°)                                                                                                                         | 90                                                                          |
| Z                                                                                                                            | 2                                                                           |
| Volume(Å <sup>3</sup> )                                                                                                      | 560.0(5)                                                                    |
| Density (Mg/m <sup>3</sup> )                                                                                                 | 1.448                                                                       |
| μ (mm <sup>-1</sup> )                                                                                                        | 0.135                                                                       |
| F(000)                                                                                                                       | 248                                                                         |
| Reflections Collected                                                                                                        | 3502                                                                        |
| Independent Reflections                                                                                                      | 1733                                                                        |
| R <sub>int</sub>                                                                                                             | 0.0475                                                                      |
| Number of parameters                                                                                                         | 154                                                                         |
| GOF on F <sup>2</sup>                                                                                                        | 1.187                                                                       |
| Final R <sub>1</sub> /wR <sub>2</sub> (I ≥ 2σ(I))                                                                            | 0.0902/0.1719                                                               |
| Weighted R <sub>1</sub> /wR <sub>2</sub> (all data)                                                                          | 0.1184/0.1827                                                               |
| $R_1 = \frac{\sum   F_o  -  F_c  }{\sum  F_o }; wR_2 = \left[ \frac{\sum w(F_o^2 - F_c^2)^2}{\sum w(F_o^2)^2} \right]^{1/2}$ |                                                                             |
